# Supplementary material
Source: MDPI journal article supplement (https://www.mdpi.com/1996-1073/10/5/632)
Supplement: s1 [file s1]

## Sheet: energy times series
Table S1. Energy time series.
NODE	Node 1	Node 1	Node 2	Node 2	Node 3	Node 3	Node 4	Node 4	Node 4	Node 5	Node 5	Node 6	Node 6	Node 7	Node 7
DIRECTION	in to 66 kV	out of 66 kV	in to 66 kV	out of 66 kV	in to 66 kV	out of 66 kV	in to 66 kV	out of 66 kV	out of 66 kV	in to 66 kV	out of 66 kV	in to 66 kV	out of 66 kV	in to 66 kV	out of 66 kV
Unit	MWh	MWh	MWh	MWh	MWh	MWh	MWh	MWh	MVAr	MWh	MWh	MWh	MWh	MWh	MWh
01/01 2013	21.15	3.06	0	0	0	0	8.178	0	0.889	0	0.17	0	8.35	0	16.63
Time 02	21.38	2.99	0	0	0	0	8.171	0	0.834	0	0.18	0	8.83	0	16.41
Time 03	21.42	2.88	0	0	0	0	8.178	0	0.876	0	0.19	0	9.14	0	16.2
Time 04	21.4	2.83	0	0	0	0	8.17	0	0.865	0	0.22	0	9.5	0	15.8
Time 05	21.51	2.83	0	0	0	0	8.173	0	0.704	0	0.25	0	9.72	0	15.73
Time 06	21.53	2.9	0	0	0	0	8.168	0	0.764	0	0.26	0	9.36	0	15.97
Time 07	21.44	3.11	0	0	0	0	8.176	0	0.83	0	0.02	0	8.74	0	16.61
Time 08	21.64	3.23	0	0	0	0	8.165	0	0.763	0	0.04	0	7.87	0	17.46
Time 09	21.55	3.38	0	0	0	0	8.174	0	0.746	0	0.05	0	7.1	0	18.06
Time 10	21.51	3.49	0	0	0	0	8.165	0	0.736	0.01	0.09	0	6.29	0	18.74
Time 11	21.62	3.59	0	0	0	0	8.17	0	0.68	0.01	0.08	0	5.5	0	19.55
Time 12	21.6	3.66	0	0	0	0	8.162	0	0.612	0.01	0.18	0	4.8	0	20.08
Time 13	21.58	3.65	0	0	0	0	8.164	0	0.472	0.03	0.24	0	4.1	0	20.7
Time 14	21.67	3.68	0	0	0	0	8.162	0	0.366	0.05	0.24	0	4.22	0	20.69
Time 15	21.64	3.66	0	0	0	0	8.162	0	0.455	0.01	0.22	0	4.34	0	20.51
Time 16	21.53	3.59	0	0	0	0	8.164	0	0.498	0.04	0.42	0	4.2	0	20.5
Time 17	21.38	3.73	0	0	0	0	8.158	0	0.503	0.01	0.24	0	3.72	0	20.81
Time 18	21.6	3.91	0	0	0	0	8.153	0	0.32	0.04	0.6	0	3.65	0	20.65
Time 19	21.51	3.86	0	0	0	0	8.155	0	0.352	0.03	0.71	0	3.53	0	20.61
Time 20	21.26	3.76	0	0	0	0	8.15	0	0.407	0.01	0.44	0	3.7	0	20.53
Time 21	21.24	3.66	0	0	0	0	8.159	0	0.463	0.01	0.4	0	4.1	0	20.27
Time 22	21.35	3.6	0	0	0	0	8.15	0	0.533	0.02	0.82	0	4.32	0	19.83
Time 23	21.55	3.37	0	0	0	0	8.159	0	0.594	0.03	0.76	0	5.38	0	19.09
Time 24	21.2	3.2	0	0	0	0	8.152	0	0.74	0.02	1.08	0	5.78	0	18.27
02/01 2013	21.06	0.25	0	0	0	0	8.159	0	0.744	0.01	0.74	0	9.17	0	17.77
Time 02	21.45	0.06	0	0	0	0	8.153	0	0.746	0.03	0.63	0	10.13	0	17.27
Time 03	21.2	0.13	0	0	0	0	8.158	0	0.682	0	0.7	0	9.94	0	17.17
Time 04	21.49	0.04	0	0	0	0	8.152	0	0.576	0	0.52	0	10.46	0	17.15
Time 05	21.62	0.01	0	0	0	0	8.154	0	0.656	0	0.71	0	10.15	0	17.38
Time 06	21.55	0.29	0	0	0	0	8.15	0	0.737	0.01	1.15	0	8.88	0	17.94
Time 07	26.49	0	0	0	0	0	8.15	0	0.648	0.01	1.07	0	12.05	0	19.39
Time 08	26.16	0	0	0	0	0	8.147	0	0.395	0.02	0.94	0	9.46	0	21.9
Time 09	26.18	0	0	0	0	0	8.142	0	0.227	0.01	0.77	0	8.11	0	23.44
Time 10	26.38	0	0	0	0	0	8.142	0	0.208	0.02	1	0	7.8	0	23.73
Time 11	26.44	0	0	0	0	0	8.138	0	0.176	0.01	0.55	0	7.8	0	24.17
Time 12	26.52	0	0	0	0	0	8.142	0	0.185	0	0.85	0	7.9	0	23.82
Time 13	25.99	0	0	0	0	0	8.136	0	0.259	0	1.15	0	7.22	0	23.75
Time 14	26.12	0	0	0	0	0	8.147	0	0.264	0	0.76	0	7.68	0	23.79
Time 15	26.3	0	0	0	0	0	8.136	0	0.263	0	0.38	0	8.4	0	23.61
Time 16	26.38	0	0	0	0	0	8.147	0	0.329	0.01	0.52	0	8.95	0	22.95
Time 17	26.23	0	0	0	0	0	8.138	0	0.324	0.01	0.5	0	8.98	0	22.86
Time 18	26.21	0	0	0	0	0	8.143	0	0.354	0	1	0	8.9	0	22.41
Time 19	26.04	0	0	0	0	0	8.138	0	0.456	0	1.28	0	8.93	0	21.92
Time 20	25.8	0	0	0	0	0	8.147	0	0.544	0	1.55	0	8.57	0	21.87
Time 21	25.85	0	0	0	0	0	8.141	0	0.598	0	1.21	0	9.36	0	21.47
Time 22	26.3	0	0	0	0	0	8.13	0	0.607	0	1.23	0	10.2	0	20.96
Time 23	26.65	0	0	0	0	0	8.142	0	0.518	0	1.1	0	11.62	0	19.96
Time 24	26.24	0	0	0	0	0	8.144	0	0.666	0	0.69	0	12.84	0	18.78
03/01 2013	21.87	2.92	0	0	0	0	8.146	0	0.595	0	0.82	0	7.32	0	17.77
Time 02	21.6	2.94	0	0	0	0	8.141	0	0.632	0	1.04	0	7.39	0	17.27
Time 03	21.58	2.8	0	0	0	0	8.149	0	0.737	0	0.86	0	7.87	0	17.06
Time 04	21.64	2.7	0	0	0	0	8.141	0	0.622	0.01	1.56	0	7.44	0	16.92
Time 05	21.64	2.75	0	0	0	0	8.149	0	0.737	0	1.58	0	7.58	0	16.7
Time 06	21.4	2.82	0	0	0	0	8.142	0	0.751	0.01	1.45	0	7.46	0	16.7
Time 07	21.19	3.16	0	0	0	0	8.144	0	0.59	0.02	0.76	0	6.43	0	17.89
Time 08	21.35	3.42	0	0	0	0	8.141	0	0.347	0.01	0.46	0	4.46	0	20.12
Time 09	21.1	3.5	0	0	0	0	8.138	0	0.382	0.02	0.24	0	3.38	0	21.08
Time 10	21.87	3.2	0	0	0	0	8.143	0	0.336	0.02	0.43	0	4.22	0	21.04
Time 11	22.12	3.19	0	0	0	0	8.137	0	0.24	0.03	0.64	0	4.01	0	21.29
Time 12	22.18	3.18	0	0	0	0	8.143	0	0.256	0.01	0.39	0	4.37	0	21.23
Time 13	22.09	3.02	0	0	0	0	8.142	0	0.324	0.01	0.78	0	4.22	0	21.05
Time 14	22.03	3.02	0	0	0	0	8.142	0	0.354	0.02	0.44	0	4.54	0	21
Time 15	22.01	2.98	0	0	0	0	8.149	0	0.378	0	0.33	0	5.11	0	20.58
Time 16	22.05	3.08	0	0	0	0	8.141	0	0.433	0.01	0.42	0	5.52	0	20.04
Time 17	22.09	3.24	0	0	0	0	8.149	0	0.371	0.01	0.49	0	4.73	0	20.66
Time 18	22.05	3.36	0	0	0	0	8.143	0	0.334	0.01	1.05	0	4.06	0	20.61
Time 19	21.92	3.37	0	0	0	0	8.146	0	0.418	0	1.13	0	4.22	0	20.24
Time 20	21.8	3.28	0	0	0	0	8.15	0	0.484	0	1.61	0	4.08	0	19.89
Time 21	21.8	3.14	0	0	0	0	8.141	0	0.533	0	1.2	0	5.04	0	19.46
Time 22	21.89	3.04	0	0	0	0	8.149	0	0.544	0	1.24	0	5.64	0	18.97
Time 23	21.8	2.83	0	0	0	0	8.147	0	0.631	0	1.02	0	6.96	0	17.96
Time 24	21.83	2.52	0	0	0	0	8.144	0	0.674	0	0.7	0	8.54	0	17.01
04/01 2013	21.83	2.44	0	0	0	0	8.148	0	0.689	0	0.74	0	9.43	0	16.1
Time 02	22.01	2.39	0	0	0	0	8.141	0	0.692	0	0.59	0	10.2	0	15.66
Time 03	21.76	2.28	0	0	0	0	8.147	0	0.707	0	1.75	0	9.14	0	15.49
Time 04	21.98	2.3	0	0	0	0	8.146	0	0.688	0	1.43	0	9.65	0	15.46
Time 05	22.03	2.4	0	0	0	0	8.143	0	0.677	0	0.75	0	10.18	0	15.52
Time 06	21.89	2.63	0	0	0	0	8.149	0	0.896	0.01	1	0	9.17	0	15.99
Time 07	21.71	2.87	0	0	0	0	8.14	0	0.734	0.03	0.99	0	7.58	0	17.25
Time 08	21.74	3.3	0	0	0	0	8.14	0	0.47	0.02	1.12	0	4.68	0	19.7
Time 09	21.67	3.41	0	0	0	0	8.143	0	0.35	0	1.1	0	3.86	0	20.35
Time 10	22.03	3.08	0	0	0	0	8.132	0	0.258	0	1.29	0.02	4.18	0	20.46
Time 11	22.18	2.99	0	0	0	0	8.135	0	0.271	0.01	0.53	0	5.35	0	20.21
Time 12	21.82	2.83	0	0	0	0	8.14	0	0.408	0.02	0.32	0	5.66	0	19.97
Time 13	21.89	2.77	0	0	0	0	8.135	0	0.413	0.03	0.48	0	5.81	0	19.79
Time 14	21.91	2.84	0	0	0	0	8.143	0	0.437	0.01	0.48	0	5.74	0	19.79
Time 15	22.21	2.86	0	0	0	0	8.141	0	0.42	0.01	0.58	0	6.1	0	19.57
Time 16	22.18	2.93	0	0	0	0	8.141	0	0.505	0.01	0.46	0	6.79	0	18.91
Time 17	22.19	2	0	0	0	0	8.149	0	0.456	0.02	0.54	0	7.32	0	19.13
Time 18	22.18	1.09	0	0	0	0	8.14	0	0.427	0.02	1.02	0	7.51	0	19.27
Time 19	22.09	2.32	0	0	0	0	8.142	0	0.494	0	0.91	0	6.43	0	19.26
Time 20	22.03	2.36	0	0	0	0	8.144	0	0.56	0	1.07	0	6.31	0	19.16
Time 21	21.94	2.16	0	0	0	0	8.147	0	0.599	0	1.07	0	6.89	0	18.69
Time 22	21.73	1.58	0	0	0	0	8.149	0	0.686	0.01	0.96	0	7.75	0	18.29
Time 23	21.87	0.19	0	0	0	0	8.146	0	0.686	0	0.54	0	10.44	0	17.24
Time 24	22.38	0	0	0	0	0	8.143	0	0.64	0.01	0.67	0	11.71	0	16.39
05/01 2013	22.28	0	0	0	0	0	8.147	0	0.73	0.03	0.29	0	12.82	0	15.57
Time 02	22.33	0	0	0	0	0	8.147	0	0.834	0.02	0.26	0	13.42	0	15
Time 03	22.38	0	0	0	0	0	8.147	0	0.912	0	0.16	0	13.78	0	14.73
Time 04	22.63	0	0	0	0	0	8.144	0	0.75	0	0.4	0	13.9	0	14.59
Time 05	22.77	0	0	0	0	0	8.147	0	0.709	0.01	0.19	0	14.18	0	14.65
Time 06	22.28	0	0	0	0	0	8.149	0	0.85	0.02	0.21	0	13.75	0	14.66
Time 07	22.29	0	0	0	0	0	8.141	0	0.881	0.01	0.21	0	13.32	0	15.06
Time 08	22.11	0	0	0	0	0	8.148	0	0.835	0.01	0.33	0	12.19	0	15.96
Time 09	22.11	0.05	0	0	0	0	8.149	0	0.74	0.03	0.33	0	11.47	0	16.73
Time 10	22.23	0.7	0	0	0	0	8.144	0	0.562	0.05	0.44	0	9.79	0	17.91
Time 11	22.1	0.88	0	0	0	0	8.138	0	0.505	0.02	0.17	0	9.07	0	18.63
Time 12	22.12	0.85	0	0	0	0	8.141	0	0.48	0.03	0.2	0	9.1	0	18.64
Time 13	22.19	0.66	0	0	0	0	8.147	0	0.479	0.04	0.46	0	9.19	0	18.51
Time 14	22.09	0.76	0	0	0	0	8.14	0	0.607	0.02	0.29	0	9.38	0	18.26
Time 15	21.78	0.82	0	0	0	0	8.141	0	0.726	0.01	0.19	0	9.48	0	17.92
Time 16	21.89	0.84	0	0	0	0	8.143	0	0.641	0.01	0.14	0	9.5	0	18.06
Time 17	22.1	1.02	0	0	0	0	8.142	0	0.515	0.02	0.25	0	8.66	0	18.85
Time 18	22.05	1.3	0	0	0	0	8.134	0	0.482	0.01	0.71	0	7.61	0	19.2
Time 19	22.09	1.31	0	0	0	0	8.14	0	0.51	0.01	0.53	0	7.94	0	19.01
Time 20	21.91	1.32	0	0	0	0	8.14	0	0.604	0.02	0.18	0	8.45	0	18.73
Time 21	22.01	1.12	0	0	0	0	8.141	0	0.648	0.02	0.13	0	9.36	0	18.09
Time 22	22.01	1.2	0	0	0	0	8.147	0	0.742	0.04	0.27	0	9.94	0	17.32
Time 23	22.07	1.94	0	0	0	0	8.156	0	0.782	0.03	0.04	0	10.18	0	16.66
Time 24	21.98	1.78	0	0	0	0	8.159	0	0.836	0.01	0.01	0	10.85	0	16.09
06/01 2013	21.67	1.73	0	0	0	0	8.149	0	0.928	0.01	0.01	0	11.09	0	15.53
Time 02	21.94	1.6	0	0	0	0	8.154	0	0.832	0	0.04	0	12.1	0	14.88
Time 03	21.96	1.51	0	0	0	0	8.155	0	0.746	0	0.06	0	12.41	0	14.61
Time 04	21.91	1.48	0	0	0	0	8.153	0	0.84	0	0.04	0	12.43	0	14.56
Time 05	21.96	1.45	0	0	0	0	8.152	0	0.782	0	0.05	0	12.53	0	14.55
Time 06	22.18	1.55	0	0	0	0	8.155	0	0.766	0	0.08	0	12.48	0	14.64
Time 07	21.94	1.61	0	0	0	0	8.153	0	0.81	0	0.11	0	12.07	0	14.84
Time 08	21.78	1.79	0	0	0	0	8.153	0	0.75	0.02	0.26	0	10.9	0	15.57
Time 09	21.8	1.98	0	0	0	0	8.149	0	0.764	0.01	0.11	0	10.13	0	16.42
Time 10	22.1	1.99	0	0	0	0	8.152	0	0.637	0	0.13	0	9.43	0	17.3
Time 11	22.12	2.08	0	0	0	0	8.155	0	0.641	0.01	0.25	0	8.52	0	18.09
Time 12	22.21	2.16	0	0	0	0	8.154	0	0.598	0.01	0.63	0	8.02	0	18.25
Time 13	21.89	2.05	0	0	0	0	8.15	0	0.666	0.01	0.77	0	7.94	0	18
Time 14	21.85	1.94	0	0	0	0	8.15	0	0.655	0.01	0.53	0	8.3	0	17.88
Time 15	22	1.97	0	0	0	0	8.148	0	0.613	0.02	0.44	0	8.93	0	17.51
Time 16	22.09	1.91	0	0	0	0	8.149	0	0.624	0.02	0.38	0	8.93	0	17.67
Time 17	22.14	2.17	0	0	0	0	8.15	0	0.521	0.01	0.44	0	7.73	0	18.64
Time 18	21.98	2.26	0	0	0	0	8.148	0	0.569	0.01	0.41	0	7.27	0	18.92
Time 19	21.71	2.39	0	0	0	0	8.148	0	0.612	0.01	0.42	0	6.89	0	18.94
Time 20	21.74	1.06	0	0	0	0	8.141	0	0.578	0.01	0.48	0	7.87	0	19.11
Time 21	21.78	0.19	0	0	0	0	8.143	0	0.619	0.02	0.5	0	8.64	0	19.09
Time 22	21.85	0.11	0	0	0	0	8.147	0	0.674	0.02	0.63	0	9.1	0	18.63
Time 23	22.09	0	0	0	0	0	8.149	0	0.655	0.01	0.14	0	10.66	0	17.86
Time 24	22	0	0	0	0	0	8.142	0	0.654	0.02	0.29	0	11.28	0	16.93
07/01 2013	21.67	2.53	0	0	0	0	8.136	0	0.524	0.02	0.28	0	9.79	0	15.99
Time 02	21.85	2.57	0	0	0	0	8.14	0	0.382	0.02	0.12	0	10.39	0	15.71
Time 03	22.09	2.48	0	0	0	0	8.143	0	0.421	0	0.28	0	10.58	0	15.55
Time 04	22.23	2.47	0	0	0	0	8.147	0	0.349	0	0.21	0	10.82	0	15.52
Time 05	22.05	2.7	0	0	0	0	8.14	0	0.432	0.01	0.17	0	10.13	0	15.94
Time 06	22	2.72	0	0	0	0	8.137	0	0.335	0.02	0.35	0	9.31	0	16.5
Time 07	21.94	0.49	0	0	0	0	8.136	0	0.272	0.02	0.65	0	9.29	0	18.21
Time 08	22.09	0.89	0	0	0	0	8.14	0	0.3	0.03	0.45	0	6.31	0	21.15
Time 09	22	1.34	0	0	0	0	8.136	0	0.184	0.02	0.35	0	4.85	0	22.25
Time 10	21.91	1.26	0	0	0	0	8.132	0	0.22	0.03	0.43	0	4.97	0	22.06
Time 11	21.94	1.1	0	0	0	0	8.131	0	0.205	0.05	0.44	0	5.02	0	22.14
Time 12	21.87	0.98	0	0	0	0	8.132	0	0.264	0.02	0.4	0	5.38	0	21.89
Time 13	21.89	0.78	0	0	0	0	8.132	0	0.253	0.02	1.03	0	5.23	0	21.58
Time 14	22.14	0.84	0	0	0	0	8.135	0	0.205	0.02	0.58	0	5.81	0	21.63
Time 15	21.98	0.97	0	0	0	0	8.112	0	0.254	0.01	0.29	0	5.81	0	21.59
Time 16	21.76	1.12	0	0	0	0	8.114	0	0.391	0.02	0.37	0	6.22	0	20.84
Time 17	21.71	1.33	0	0	0	0	8.113	0	0.388	0.01	0.45	0	5.98	0	20.74
Time 18	21.67	1.48	0	0	0	0	8.113	0	0.408	0	1.02	0	5.5	0	20.53
Time 19	22.18	1.32	0	0	0	0	8.122	0	0.362	0	0.95	0	6.29	0	20.33
Time 20	22.16	1.13	0	0	0	0	8.116	0	0.408	0	1.21	0	6.55	0	20.01
Time 21	21.78	1.18	0	0	0	0	8.114	0	0.496	0	1.58	0	6.1	0	19.75
Time 22	21.65	1.08	0	0	0	0	8.111	0	0.594	0	1.27	0	6.74	0	19.29
Time 23	21.83	0.79	0	0	0	0	8.117	0	0.686	0	1.03	0	8.54	0	18.2
Time 24	21.78	0.65	0	0	0	0	8.119	0	0.798	0	0.71	0	9.96	0	17.06
08/01 2013	21.67	3.02	0	0	0	0	8.112	0	0.904	0	0.79	0	8.52	0	16.27
Time 02	22.1	2.83	0	0	0	0	8.118	0	0.73	0	0.99	0	9.38	0	15.75
Time 03	21.92	2.84	0	0	0	0	8.119	0	0.762	0	1.14	0	9.26	0	15.58
Time 04	21.96	2.94	0	0	0	0	8.12	0	0.766	0	1.5	0	8.9	0	15.54
Time 05	22.01	3.01	0	0	0	0	8.118	0	0.724	0	1.62	0	8.57	0	15.75
Time 06	21.96	3.12	0	0	0	0	8.116	0	0.758	0.01	1.37	0	8.06	0	16.37
Time 07	22	1.01	0	0	0	0	8.112	0	0.527	0	1.07	0	8.59	0	18
Time 08	22.03	1.61	0	0	0	0	8.111	0	0.324	0	0.82	0	5.69	0	20.72
Time 09	21.8	1.81	0	0	0	0	8.096	0	0.258	0.01	0.61	0	4.13	0	22.11
Time 10	21.94	1.5	0	0	0	0	8.101	0	0.232	0.06	0.54	0	4.39	0	22.33
Time 11	21.98	1.52	0	0	0	0	8.1	0	0.212	0.05	0.69	0	4.34	0	22.23
Time 12	21.94	1.51	0	0	0	0	8.096	0	0.24	0.07	1.01	0	4.27	0	22
Time 13	22.01	1.36	0	0	0	0	8.105	0	0.253	0	1.06	0	4.66	0	21.68
Time 14	21.83	1.52	0	0	0	0	8.092	0	0.301	0	0.7	0	4.51	0	21.84
Time 15	21.89	1.45	0	0	0	0	8.101	0	0.289	0	0.62	0	4.9	0	21.72
Time 16	22	1.56	0	0	0	0	8.101	0	0.382	0	0.7	0	5.18	0	21.34
Time 17	21.96	1.87	0	0	0	0	8.081	0	0.323	0	0.78	0	4.73	0	21.42
Time 18	21.74	2.1	0	0	0	0	8.056	0	0.361	0	1.03	0	3.94	0	21.51
Time 19	21.78	2.09	0	0	0	0	8.027	0	0.39	0	0.98	0	4.3	0	21.2
Time 20	21.94	1.97	0	0	0	0	7.997	0	0.366	0	1.56	0	4.13	0	21.07
Time 21	21.91	1.94	0	0	0	0	7.97	0	0.409	0	1.36	0	4.8	0	20.56
Time 22	22.01	1.61	0	0	0	0	7.436	0	0.359	0.01	1.23	0	5.33	0	20.05
Time 23	21.87	3.84	0	0	0	0	5.092	0	0.122	0	0.87	0	2.3	0	19.11
Time 24	21.78	3.6	0	0	0	0	5.129	0	0.292	0	0.47	0	4.03	0	17.92
09/01 2013	22.3	3.5	0	0	0	0	5.122	0	0.296	0.01	0.73	0	5.21	0	17.05
Time 02	22.28	3.43	0	0	0	0	5.116	0	0.331	0	0.83	0	5.62	0	16.56
Time 03	22	3.31	0	0	0	0	5.106	0	0.403	0	0.98	0	5.52	0	16.36
Time 04	21.98	3.32	0	0	0	0	5.084	0	0.23	0.01	1.61	0	5.14	0	16.12
Time 05	21.85	3.44	0	0	0	0	5.076	0	0.346	0	1.36	0	4.85	0	16.39
Time 06	21.87	3.54	0	0	0	0	5.068	0	0.115	0.01	1.3	0	4.44	0	16.83
Time 07	21.83	3.89	0	0	0	0	5.054	0	0.011	0	0.96	0	2.66	0	18.52
Time 08	21.98	4.3	0	0	0	0	5.041	0	0	0	0.65	0.5	0.29	0	21.45
Time 09	21.78	4.49	0	0	0	0	5.027	0	0	0.02	0.54	1.7	0	0	22.64
Time 10	21.92	4.25	0	0	0	0	5.009	0	0	0.05	0.49	1.22	0	0	22.57
Time 11	22.1	4.24	0	0	0	0	4.981	0	0	0.03	0.56	1.08	0	0	22.48
Time 12	22.09	4.21	0	0	0	0	4.966	0	0	0.01	0.83	1.22	0	0	22.3
Time 13	22.1	4.16	0	0	0	0	4.948	0	0	0.02	1.31	1.61	0	0	22.28
Time 14	21.96	4.14	0	0	0	0	4.928	0	0	0	0.8	1.32	0	0	22.34
Time 15	21.87	4.15	0	0	0	0	4.896	0	0	0	0.57	1.2	0	0	22.37
Time 16	22.16	4.21	0	0	0	0	4.865	0	0	0	0.63	0.41	0	0	21.72
Time 17	21.71	4.38	0	0	0	0	4.866	0	0	0	0.7	1.06	0	0	21.71
Time 18	21.6	4.49	0	0	0	0	4.842	0	0.001	0.01	0.89	1.3	0	0	21.58
Time 19	21.73	4.49	0	0	0	0	4.816	0	0	0	1.13	1.03	0	0	21.12
Time 20	21.71	4.45	0	0	0	0	4.792	0	0.001	0	1.44	1.01	0.02	0	20.77
Time 21	21.78	4.45	0	0	0	0	4.747	0	0.004	0	1.08	0.41	0.12	0	20.51
Time 22	21.82	4.3	0	0	0	0	4.72	0	0.001	0.01	1.08	0.17	0.43	0	20.12
Time 23	21.94	4.14	0	0	0	0	4.7	0	0	0	0.84	0.05	1.37	0	19.51
Time 24	21.64	3.89	0	0	0	0	4.652	0	0	0	0.41	0	2.62	0	18.62
10/01 2013	21.48	0.19	0	0	0	0	4.624	0	0	0	1	0	6.1	0	17.72
Time 02	21.94	0.02	0	0	0	0	4.583	0	0	0	1.21	0	6.74	0	17.35
Time 03	22.16	0	0	0	0	0	4.552	0	0	0	0.34	0	7.9	0	17.24
Time 04	22.35	0.01	0	0	0	0	4.524	0	0	0	0.49	0	7.87	0	17.24
Time 05	22.12	0.1	0	0	0	0	4.48	0	0	0	0.95	0	6.82	0	17.56
Time 06	22.84	0.3	0	0	0	0	4.448	0	0	0	1.44	0	6.07	0	18.3
Time 07	26.92	0	0	0	0	0	4.41	0	0	0	1.38	0	7.87	0	20.36
Time 08	26.75	0	0	0	0	0	4.364	0	0	0	1.46	0	4.18	0	23.84
Time 09	26.53	0	0	0	0	0	4.309	0	0	0	1.08	0	2.9	0	25.17
Time 10	26.79	0	0	0	0	0	4.271	0	0	0.02	0.94	0.02	3.05	0	25.43
Time 11	26.96	0	0	0	0	0	4.225	0	0	0	0.64	0	3.5	0	25.32
Time 12	27.02	0	0	0	0	0	4.216	0	0	0.05	0.66	0	4.3	0	24.55
Time 13	26.85	0	0	0	0	0	4.211	0	0.001	0.01	0.98	0	4.01	0	24.36
Time 14	27.08	0	0	0	0	0	4.187	0	0.005	0.01	0.6	0	4.97	0	23.94
Time 15	27.09	0	0	0	0	0	4.168	0	0.02	0	0.75	0	5.33	0	23.44
Time 16	27.05	0	0	0	0	0	4.139	0	0.142	0	0.77	0	6.17	0	22.51
Time 17	26.43	0	0	0	0	0	4.096	0	0.136	0	0.79	0	5.26	0	22.82
Time 18	26.3	0	0	0	0	0	4.045	0	0.052	0	1.03	0	4.3	0	23.42
Time 19	26.28	0	0	0	0	0	3.996	0	0.036	0	1.22	0	3.91	0	23.56
Time 20	26.31	0	0	0	0	0	3.956	0	0.11	0	1.66	0	3.86	0	23.2
Time 21	26.22	0	0	0	0	0	3.904	0	0.198	0	1.15	0	4.51	0	22.88
Time 22	26.55	0	0	0	0	0	3.859	0	0.23	0.02	1	0	5.3	0	22.55
Time 23	26.55	0	0	0	0	0	3.816	0	0.371	0	0.6	0	6.38	0	21.78
Time 24	26.42	0	0	0	0	0	3.751	0	0.396	0	1.07	0	7.01	0	20.54
11/01 2013	26.73	0	0	0	0	0	3.689	0	0.307	0	1.28	0	7.66	0	19.88
Time 02	27.05	0	0	0	0	0	3.612	0	0.268	0	0.59	0	9.07	0	19.33
Time 03	27.01	0	0	0	0	0	3.626	0	0.296	0	0.77	0	8.93	0	19.28
Time 04	26.83	0	0	0	0	0	3.664	0	0.365	0	1.24	0	8.35	0	19.28
Time 05	26.67	0	0	0	0	0	3.674	0	0.358	0.01	2.02	0	7.2	0	19.51
Time 06	26.35	0	0	0	0	0	3.632	0	0.254	0	1.7	0	6.55	0	20.21
Time 07	26.03	0	0	0	0	0	3.631	0	0.013	0	1.05	0	4.58	0	22.56
Time 08	25.51	0	0	0	0	0	3.68	0	0.007	0.01	0.75	0.05	1.73	0	25.28
Time 09	25.25	0	0	0	0	0	4.219	0	0	0.01	0.49	0.1	0.5	0	27.01
Time 10	25.36	0	0	0	0	0	4.283	0	0	0.07	0.55	0.05	0.55	0	27.09
Time 11	25.34	0	0	0	0	0	4.223	0	0.012	0.06	0.62	0.12	0.62	0	26.92
Time 12	25.12	0	0	0	0	0	4.213	0	0.071	0.04	0.45	0	1.32	0	26.09
Time 13	25.54	0	0	0	0	0	4.248	0	0.092	0	1.04	0.02	1.68	0	25.48
Time 14	26.06	0	0	0	0	0	4.279	0	0.12	0	0.88	0	3	0	24.81
Time 15	26.17	0	0	0	0	0	4.265	0	0.145	0	0.67	0	3.53	0	24.61
Time 16	26.13	0	0	0	0	0	4.228	0	0.228	0	0.68	0	4.25	0	23.83
Time 17	25.63	0	0	0	0	0	4.176	0	0.247	0	0.73	0	3.38	0	24.18
Time 18	25.54	0	0	0	0	0	4.118	0	0.144	0	1.05	0	2.57	0	24.5
Time 19	25.18	0	0	0	0	0	4.087	0	0.224	0	0.76	0	2.69	0	24.33
Time 20	25.02	0	0	0	0	0	4.02	0	0.26	0	0.76	0	2.45	0	24.36
Time 21	25.47	0	0	0	0	0	3.974	0	0.242	0	1.27	0	2.66	0	24.01
Time 22	25.59	0	0	0	0	0	3.905	0	0.317	0.02	1.2	0	3.46	0	23.36
Time 23	25.63	0	0	0	0	0	3.851	0	0.248	0.01	0.62	0	4.61	0	22.77
Time 24	25.87	0	0	0	0	0	3.845	0	0.018	0	0.67	0	5.42	0	22.13
12/01 2013	25.39	0	0	0	0	0	3.816	0	0.02	0	0.51	0	5.64	0	21.66
Time 02	25.38	0	0	0	0	0	3.804	0	0.077	0	0.47	0	6	0	21.24
Time 03	25.35	0	0	0	0	0	3.772	0	0.052	0	0.26	0	6.31	0	21.11
Time 04	25.42	0	0	0	0	0	3.727	0	0.053	0	0.48	0	6.24	0	21.02
Time 05	25.34	0	0	0	0	0	3.708	0	0.096	0	0.61	0	5.88	0	21.14
Time 06	25.31	0	0	0	0	0	3.689	0	0.148	0	0.57	0	5.62	0	21.39
Time 07	24.73	0	0	0	0	0	3.648	0	0.095	0.01	0.71	0	4.46	0	21.91
Time 08	24.82	0	0	0	0	0	3.619	0	0	0	0.68	0	3.41	0	23.02
Time 09	24.46	0	0	0	0	0	3.587	0	0	0	0.54	0	1.97	0	24.21
Time 10	24.55	0	0	0	0	0	3.575	0	0.024	0.02	0.6	0	0.89	0	25.3
Time 11	24.73	0	0	0	0	0	2.921	0	0.048	0	0.42	0.17	0.12	0	25.92
Time 12	24.58	0	0	0	0	0	2.786	0	0.089	0	0.46	0.17	0.1	0	25.61
Time 13	24.75	0	0	0	0	0	2.809	0	0.151	0	0.71	0.02	0.46	0	25.05
Time 14	24.89	0	0	0	0	0	2.845	0	0.218	0	0.59	0	1.27	0	24.47
Time 15	25.83	0	0	0	0	0	2.863	0	0.224	0.01	0.68	0	2.66	0	23.9
Time 16	25.86	0	0	0	0	0	2.876	0	0.174	0	0.45	0	2.98	0	23.83
Time 17	25.74	0	0	0	0	0	2.843	0	0.05	0	0.54	0	1.97	0	24.66
Time 18	25.41	0	0	0	0	0	2.777	0	0.001	0	0.76	0.02	0.94	0	25.06
Time 19	25.25	0	0	0	0	0	2.712	0	0.024	0	0.76	0.02	0.7	0	25.17
Time 20	24.93	0	0	0	0	0	2.663	0	0.068	0	0.81	0.05	0.31	0	25.17
Time 21	25.02	0	0	0	0	0	2.624	0	0.156	0	0.44	0	1.37	0	24.54
Time 22	25.53	0	0	0	0	0	2.588	0	0.162	0.01	0.45	0	2.47	0	23.79
Time 23	25.69	0	0	0	0	0	2.544	0	0.157	0	0.29	0	3.31	0	23.26
Time 24	25.73	0	0	0	0	0	2.521	0	0.047	0	0.16	0	4.1	0	22.62
13/01 2013	24.84	0	0	0	0	0	2.526	0	0.006	0	0.15	0	3.72	0	22.21
Time 02	25.06	0	0	0	0	0	2.518	0	0	0	0.15	0	4.49	0	21.63
Time 03	25.39	0	0	0	0	0	2.476	0	0	0	0.15	0	5.16	0	21.24
Time 04	25.47	0	0	0	0	0	2.472	0	0	0	0.17	0	5.18	0	21.21
Time 05	25.49	0	0	0	0	0	2.452	0	0	0	0.18	0	4.87	0	21.54
Time 06	25.57	0	0	0	0	0	2.411	0	0	0	0.24	0	4.75	0	21.6
Time 07	25.22	0	0	0	0	0	2.399	0	0	0	0.38	0	4.03	0	21.91
Time 08	24.82	0	0	0	0	0	2.386	0	0	0	0.5	0	2.95	0	22.5
Time 09	25.46	0	0	0	0	0	2.362	0	0	0	0.35	0	2.62	0	23.46
Time 10	25.62	0	0	0	0	0	2.346	0	0	0	0.39	0	2.06	0	24.16
Time 11	25.73	0	0	0	0	0	2.303	0	0	0	0.46	0	1.3	0	24.92
Time 12	25.71	0	0	0	0	0	1.961	0	0	0	0.96	0.07	0.74	0	24.62
Time 13	25.73	0	0	0	0	0	1.993	0	0.006	0	1.14	0.05	0.94	0	24.31
Time 14	25.62	0	0	0	0	0	2.033	0	0.059	0	0.73	0	1.61	0	23.91
Time 15	25.97	0	0	0	0	0	2.029	0	0.073	0	0.74	0	2.33	0	23.56
Time 16	26	0	0	0	0	0	2.053	0	0.056	0	0.61	0	2.66	0	23.38
Time 17	25.76	0	0	0	0	0	2.029	0	0.005	0	0.69	0	1.7	0	24
Time 18	25.56	0	0	0	0	0	2.026	0	0	0	0.7	0	0.84	0	24.7
Time 19	25.73	0	0	0	0	0	2.028	0	0	0	0.66	0	1.06	0	24.63
Time 20	25.48	0	0	0	0	0	1.996	0	0.001	0	0.7	0.02	0.77	0	24.69
Time 21	25.54	0	0	0	0	0	1.994	0	0.019	0	0.53	0	1.13	0	24.53
Time 22	25.87	0	0	0	0	0	1.723	0	0.046	0	0.98	0	1.37	0	23.91
Time 23	25.98	0	0	0	0	0	1.583	0	0.067	0	0.46	0	2.59	0	23.12
Time 24	26.01	0	0	0	0	0	1.576	0	0.005	0	0.47	0	3.74	0	22.03
14/01 2013	26.01	0	0	0	0	0	1.531	0	0.004	0	0.48	0	4.44	0	21.32
Time 02	26.53	0	0	0	0	0	1.543	0	0.008	0	0.27	0	5.35	0	21
Time 03	26.52	0	0	0	0	0	1.573	0	0.001	0	0.31	0	5.74	0	20.66
Time 04	26.5	0	0	0	0	0	1.57	0	0.004	0	0.45	0	5.66	0	20.53
Time 05	26.34	0	0	0	0	0	1.589	0	0.017	0	0.45	0	5.26	0	20.86
Time 06	26.05	0	0	0	0	0	1.591	0	0.001	0	0.67	0	3.98	0	21.62
Time 07	25.63	0	0	0	0	0	1.612	0	0	0	0.91	0.05	1.63	0	23.39
Time 08	25.34	0	0	0	0	0	1.606	0	0	0.01	0.69	1.75	0	0	26.59
Time 09	25.24	0	0	0	0	0	1.598	0	0	0.02	0.54	2.76	0	0	27.65
Time 10	25.47	0	0	0	0	0	1.598	0	0.001	0.03	0.52	2.69	0	0	27.78
Time 11	25.66	0	0	0	0	0	1.585	0	0.005	0.01	0.56	2.18	0	0	27.44
Time 12	26.05	0	0	0	0	0	1.591	0	0.002	0	0.47	1.56	0	0	27.19
Time 13	26.12	0	0	0	0	0	1.609	0	0.01	0.01	1.1	1.63	0	0	26.77
Time 14	26.17	0	0	0	0	0	1.637	0	0.029	0	0.68	0.72	0.02	0	26.35
Time 15	26.1	0	0	0	0	0	1.656	0	0.06	0	0.56	0.46	0.05	0	26.11
Time 16	25.98	0	0	0	0	0	1.67	0	0.154	0	0.65	0.07	0.22	0	25.43
Time 17	25.64	0	0	0	0	0	1.65	0	0.142	0	0.74	0.34	0.07	0	25.46
Time 18	25.2	0	0	0	0	0	1.626	0	0.124	0.01	1	0.98	0	0	25.44
Time 19	25.37	0	0	0	0	0	1.594	0	0.133	0	1.2	0.79	0.05	0	25.18
Time 20	25.68	0	0	0	0	0	1.588	0	0.092	0	1.65	0.74	0.14	0	24.85
Time 21	25.69	0	0	0	0	0	1.566	0	0.114	0	1.1	0.17	0.43	0	24.52
Time 22	25.93	0	0	0	0	0	1.562	0	0.06	0	1.1	0.02	1.22	0	23.83
Time 23	26.24	0	0	0	0	0	1.56	0	0.073	0.01	0.97	0	2.52	0	22.94
Time 24	26.32	0	0	0	0	0	1.548	0	0.052	0	0.7	0	4.03	0	21.75
15/01 2013	26.5	0	0	0	0	0	1.519	0	0.002	0	0.94	0	4.85	0	20.82
Time 02	26.66	0	0	0	0	0	1.526	0	0	0	0.83	0	5.54	0	20.39
Time 03	26.61	0	0	0	0	0	1.532	0	0.001	0	0.85	0	5.62	0	20.3
Time 04	26.73	0	0	0	0	0	1.494	0	0.004	0	1.85	0	4.63	0	20.38
Time 05	26.66	0	0	0	0	0	1.463	0	0.005	0	1.29	0	4.92	0	20.49
Time 06	26.38	0	0	0	0	0	1.462	0	0.004	0.01	1.04	0	4.18	0	21.26
Time 07	25.91	0	0	0	0	0	1.436	0	0	0.01	0.68	0	2.11	0	23.25
Time 08	25.75	0	0	0	0	0	1.442	0	0.001	0	0.98	1.46	0.05	0	26.21
Time 09	24.8	0	0	0	0	0	1.423	0	0.012	0.01	0.55	3	0	0	27.31
Time 10	24.52	0	0	0	0	0	1.411	0	0.094	0.03	0.36	3.19	0	0	27.41
Time 11	24.87	0	0	0	0	0	1.406	0	0.046	0.05	0.38	2.83	0	0	27.4
Time 12	24.92	0	0	0	0	0	1.411	0	0.082	0.01	0.52	2.47	0	0	26.9
Time 13	25.16	0	0	0	0	0	1.422	0	0.082	0.01	0.93	2.23	0	0	26.5
Time 14	25.28	0	0	0	0	0	1.427	0	0.056	0.02	0.46	1.54	0	0	26.42
Time 15	25.22	0	0	0	0	0	1.404	0	0.032	0	0.56	1.44	0	0	26.15
Time 16	25.17	0	0	0	0	0	1.39	0	0.106	0	0.61	0.79	0	0	25.4
Time 17	24.84	0	0	0	0	0	1.364	0	0.059	0	0.77	1.03	0	0	25.22
Time 18	24.57	0	0	0	0	0	1.332	0	0.042	0	0.91	2.02	0	0	25.71
Time 19	24.32	0	0	0	0	0	1.309	0	0.053	0.01	1.03	1.85	0	0	25.2
Time 20	24.48	0	0	0	0	0	1.276	0	0.05	0	1.5	2.04	0	0	25.04
Time 21	24.59	0	0	0	0	0	1.236	0	0.053	0.01	0.97	0.91	0	0	24.55
Time 22	24.59	0	0	0	0	0	1.207	0	0.047	0.01	0.99	0.6	0.05	0	24.17
Time 23	24.95	0	0	0	0	0	1.19	0	0.012	0	0.84	0.14	0.74	0	23.47
Time 24	25.09	0	0	0	0	0	1.171	0	0.012	0	0.46	0	2.35	0	22.22
16/01 2013	25.17	0	0	0	0	0	1.163	0	0.001	0.02	0.53	0	3.36	0	21.26
Time 02	25.62	0	0	0	0	0	1.129	0	0.006	0	0.81	0	3.74	0	20.95
Time 03	25.34	0	0	0	0	0	1.121	0	0.008	0	0.72	0	3.55	0	20.95
Time 04	25.47	0	0	0	0	0	1.112	0	0.01	0	1.46	0	2.86	0	21.06
Time 05	25.19	0	0	0	0	0	1.109	0	0.004	0	1.77	0	1.99	0	21.36
Time 06	24.94	0	0	0	0	0	1.093	0	0.005	0	1.51	0.02	1.34	0	22.01
Time 07	25.45	0	0	0	0	0	1.085	0	0.001	0.01	0.79	0.38	0.53	0	24.33
Time 08	25.08	0	0	0	0	0	1.082	0	0.011	0.01	0.52	3.36	0	0	27.62
Time 09	24.86	0	0	0	0	0	1.08	0	0.013	0.03	0.36	4.9	0	0	29.05
Time 10	24.85	0	0	0	0	0	1.073	0	0.026	0.06	0.4	4.87	0	0	29.01
Time 11	25.18	0	0	0	0	0	1.063	0	0	0.02	0.63	4.66	0	0	28.83
Time 12	25.1	0	0	0	0	0	1.073	0	0.025	0.03	0.73	4.32	0	0	28.37
Time 13	25.21	0	0	0	0	0	1.085	0	0.036	0.01	0.95	3.6	0	0	27.53
Time 14	25.48	0	0	0	0	0	1.112	0	0.036	0.02	0.51	2.28	0	0	26.97
Time 15	25.72	0	0	0	0	0	1.1	0	0.029	0.01	0.33	1.15	0	0	26.26
Time 16	26	0	0	0	0	0	1.126	0	0.019	0.01	0.41	0.34	0.02	0	25.62
Time 17	25.8	0	0	0	0	0	1.121	0	0.016	0.01	0.49	0.6	0	0	25.66
Time 18	25.24	0	0	0	0	0	1.111	0	0.002	0	1	2.06	0	0	26.1
Time 19	25.43	0	0	0	0	0	1.093	0	0.006	0.01	1.09	1.56	0	0	25.66
Time 20	25.54	0	0	0	0	0	1.086	0	0.036	0	1.51	1.78	0	0	25.53
Time 21	25.49	0	0	0	0	0	0.587	0	0.004	0	1.14	1.18	0	0	24.82
Time 22	25.41	0	0	0	0	0	0.486	0	0	0.01	1.24	0.91	0.05	0	24.3
Time 23	25.33	0	0	0	0	0	0.479	0	0	0	0.95	0.24	0.43	0	23.4
Time 24	25.21	0	0	0	0	0	0.487	0	0	0	0.6	0	1.42	0	22.48
17/01 2013	25.24	0	0	0	0	0	0.488	0	0	0	0.65	0	2.38	0	21.5
Time 02	26.07	0	0	0	0	0	0.488	0	0	0	0.86	0	3.43	0	21.01
Time 03	25.79	0	0	0	0	0	0.486	0	0	0.01	1.04	0	3.14	0	20.87
Time 04	25.94	0	0	0	0	0	0.49	0	0	0.01	1.77	0	2.69	0	20.69
Time 05	25.99	0	0	0	0	0	0.491	0	0	0	1.6	0	2.54	0	21.07
Time 06	25.55	0	0	0	0	0	0.492	0	0	0	1.38	0	1.68	0	21.79
Time 07	25.03	0	0	0	0	0	0.493	0	0	0.01	0.81	0.74	0.29	0	23.91
Time 08	24.44	0	0	0	0	0	0.493	0	0	0.01	0.46	4.03	0	0	27.2
Time 09	24.69	0	0	0	0	0	0.492	0	0	0.01	0.26	4.75	0	0	28.32
Time 10	25.02	0	0	0	0	0	0.674	0	0.011	0.03	0.33	4.32	0	0	28.3
Time 11	25.58	0	0	0	0	0	1.004	0	0.006	0.07	0.47	3.43	0	0	28.16
Time 12	25.62	0	0	0	0	0	0.972	0	0.001	0.06	0.75	3.36	0	0	27.8
Time 13	25.88	0	0	0	0	0	0.977	0	0.001	0.04	0.68	2.42	0	0	27.18
Time 14	25.83	0	0	0	0	0	0.978	0	0.001	0.03	0.37	1.8	0	0	26.82
Time 15	25.96	0	0	0	0	0	0.984	0	0.001	0.02	0.29	1.34	0	0	26.59
Time 16	25.68	0	0	0	0	0	0.992	0	0.001	0.03	0.37	0.91	0.02	0	25.92
Time 17	25.31	0	0	0	0	0	0.99	0	0	0.02	0.42	1.63	0	0	26.2
Time 18	25.36	0	0	0	0	0	0.983	0	0.002	0.01	0.93	2.18	0	0	26.26
Time 19	24.94	0	0	0	0	0	0.97	0	0.001	0.01	1.03	2.33	0	0	25.91
Time 20	24.92	0	0	0	0	0	0.958	0	0.001	0	1.57	2.71	0	0	25.72
Time 21	24.99	0	0	0	0	0	1.142	0	0	0.01	1	1.54	0	0	25.41
Time 22	25.23	0	0	0	0	0	1.302	0	0	0.01	1.09	0.65	0.14	0	24.67
Time 23	25.59	0	0	0	0	0	1.286	0	0	0	0.88	0.1	0.82	0	23.94
Time 24	25.45	0	0	0	0	0	1.265	0	0	0	0.48	0	2.28	0	22.73
18/01 2013	25.83	0	0	0	0	0	1.274	0	0	0.02	0.56	0	3.41	0	21.82
Time 02	25.97	0	0	0	0	0	1.286	0	0	0.01	0.76	0	4.03	0	21.17
Time 03	25.42	0	0	0	0	0	1.302	0	0	0.01	0.62	0	3.91	0	20.95
Time 04	25.49	0	0	0	0	0	1.302	0	0	0.01	1.85	0	2.86	0	20.81
Time 05	25.55	0	0	0	0	0	1.316	0	0.001	0	1.55	0	3.07	0	20.97
Time 06	25.4	0	0	0	0	0	1.321	0	0.001	0	1.45	0.02	1.92	0	22.11
Time 07	25.09	0	0	0	0	0	1.351	0	0	0.01	0.78	0.17	0.65	0	23.91
Time 08	25.04	0	0	0	0	0	1.367	0	0	0.02	0.49	2.21	0	0	26.77
Time 09	24.93	0	0	0	0	0	1.378	0	0.001	0.01	0.23	3.14	0	0	27.82
Time 10	25.26	0	0	0	0	0	1.376	0	0.001	0.02	0.33	3	0	0	27.89
Time 11	25.56	0	0	0	0	0	1.381	0	0.001	0.04	0.46	2.52	0	0	27.61
Time 12	25.55	0	0	0	0	0	1.414	0	0	0.05	0.64	2.11	0	0	27.05
Time 13	25.65	0	0	0	0	0	1.411	0	0	0.02	0.75	1.63	0	0	26.52
Time 14	25.76	0	0	0	0	0	1.406	0	0	0.02	0.43	1.15	0	0	26.51
Time 15	25.91	0	0	0	0	0	1.398	0	0	0.01	0.33	0.96	0	0	26.52
Time 16	25.93	0	0	0	0	0	1.388	0	0	0.02	0.44	0.53	0.02	0	26
Time 17	25.77	0	0	0	0	0	1.363	0	0	0.01	0.53	0.41	0.05	0	25.62
Time 18	25.38	0	0	0	0	0	1.362	0	0.001	0	1.06	1.85	0	0	26.17
Time 19	24.9	0	0	0	0	0	1.354	0	0	0.01	0.94	1.87	0	0	25.9
Time 20	24.95	0	0	0	0	0	1.336	0	0	0	1.15	1.7	0	0	25.57
Time 21	25.04	0	0	0	0	0	1.337	0	0	0	1.14	0.86	0.05	0	24.75
Time 22	25.43	0	0	0	0	0	1.332	0	0	0.02	0.9	0.17	0.7	0	24.06
Time 23	25.75	0	0	0	0	0	1.318	0	0.001	0	0.46	0	2.14	0	23.15
Time 24	26.03	0	0	0	0	0	1.328	0	0	0.02	0.54	0	3.02	0	22.48
19/01 2013	26.55	0	0	0	0	0	1.313	0	0	0.06	0.24	0	4.51	0	21.77
Time 02	26.46	0	0	0	0	0	1.318	0	0	0.06	0.21	0	4.94	0	21.31
Time 03	26.68	0	0	0	0	0	1.319	0	0	0.05	0.06	0	5.59	0	20.98
Time 04	26.47	0	0	0	0	0	1.316	0	0	0.02	0.35	0	5.21	0	20.86
Time 05	26.34	0	0	0	0	0	1.314	0	0.002	0.02	0.25	0	4.99	0	21.06
Time 06	26.15	0	0	0	0	0	1.298	0	0	0.04	0.34	0	4.63	0	21.17
Time 07	25.63	0	0	0	0	0	1.283	0	0.001	0.04	0.66	0	3.29	0	21.69
Time 08	25.2	0	0	0	0	0	1.264	0	0	0.02	0.41	0	2.28	0	22.56
Time 09	25.2	0	0	0	0	0	1.244	0	0	0.02	0.3	0	0.82	0	24.14
Time 10	25.57	0	0	0	0	0	1.222	0	0	0.04	0.45	0.24	0.17	0	25.11
Time 11	25.35	0	0	0	0	0	1.199	0	0	0.01	0.2	0.65	0	0	25.73
Time 12	25.19	0	0	0	0	0	1.192	0	0	0.02	0.23	0.98	0	0	25.84
Time 13	25.36	0	0	0	0	0	1.194	0	0	0.01	0.49	0.89	0	0	25.65
Time 14	25.44	0	0	0	0	0	1.186	0	0	0.01	0.45	0.36	0.05	0	25.19
Time 15	25.64	0	0	0	0	0	1.178	0	0	0.03	0.49	0.24	0.31	0	24.95
Time 16	25.41	0	0	0	0	0	1.17	0	0	0.02	0.21	0	0.74	0	24.35
Time 17	25.19	0	0	0	0	0	1.162	0	0	0	0.3	0.24	0.1	0	24.9
Time 18	24.83	0	0	0	0	0	1.15	0	0	0.01	0.74	1.92	0	0	25.88
Time 19	24.63	0	0	0	0	0	1.148	0	0	0.02	0.58	2.28	0	0	26.23
Time 20	24.53	0	0	0	0	0	1.141	0	0	0.02	0.18	1.92	0	0	26.16
Time 21	24.65	0	0	0	0	0	1.127	0	0	0.03	0.11	1.22	0	0	25.67
Time 22	25.13	0	0	0	0	0	1.1	0	0	0.04	0.23	0.19	0.12	0	24.88
Time 23	25.49	0	0	0	0	0	1.078	0	0	0.02	0.04	0	0.79	0	24.47
Time 24	25.49	0	0	0	0	0	1.061	0	0	0.11	0	0	1.44	0	23.93
20/01 2013	25.51	0	0	0	0	0	1.039	0	0	0.12	0	0	2.02	0	23.42
Time 02	25.59	0	0	0	0	0	1.027	0	0	0.13	0	0	2.54	0	22.93
Time 03	25.79	0	0	0	0	0	1.02	0	0	0.11	0	0	2.9	0	22.7
Time 04	25.9	0	0	0	0	0	1.01	0	0	0.07	0	0	3.19	0	22.52
Time 05	25.91	0	0	0	0	0	1.012	0	0	0.06	0	0	3.02	0	22.64
Time 06	25.6	0	0	0	0	0	1.012	0	0	0.01	0.04	0	2.45	0	22.88
Time 07	25.09	0	0	0	0	0	1.01	0	0	0.01	0.1	0	1.51	0	23.3
Time 08	24.96	0	0	0	0	0	1.004	0	0	0.03	0.24	0	0.72	0	23.77
Time 09	24.72	0	0	0	0	0	1.012	0	0	0.02	0.07	0.26	0.07	0	24.65
Time 10	24.92	0	0	0	0	0	1.146	0	0	0	0.1	0.91	0	0	25.64
Time 11	25.03	0	0	0	0	0	1.441	0	0	0.01	0.11	0.91	0	0	25.98
Time 12	25.11	0	0	0	0	0	1.476	0	0	0	0.29	0.43	0	0	25.39
Time 13	25.05	0	0	0	0	0	1.51	0	0	0.01	1.02	0.86	0.02	0	25.07
Time 14	25.38	0	0	0	0	0	1.54	0	0	0.01	0.87	0.34	0.24	0	24.81
Time 15	25.76	0	0	0	0	0	1.579	0	0	0.01	0.47	0	1.06	0	24.46
Time 16	25.77	0	0	0	0	0	1.602	0	0	0.01	0.39	0	1.34	0	24.29
Time 17	25.67	0	0	0	0	0	1.634	0	0	0.01	0.51	0.02	1.08	0	24.39
Time 18	25.34	0	0	0	0	0	1.655	0	0	0.02	0.45	0.02	0.58	0	24.68
Time 19	25	0	0	0	0	0	1.7	0	0	0.02	0.48	0.07	0.31	0	24.73
Time 20	25.24	0	0	0	0	0	1.684	0	0	0	0.56	0.05	0.65	0	24.47
Time 21	25.48	0	0	0	0	0	1.668	0	0	0.01	0.43	0	0.96	0	24.44
Time 22	25.65	0	0	0	0	0	1.65	0	0	0.01	0.8	0.05	1.15	0	24.03
Time 23	25.79	0	0	0	0	0	1.625	0	0	0.01	0.18	0	2.5	0	23.41
Time 24	25.61	0	0	0	0	0	1.612	0	0.001	0.01	0.33	0	3.26	0	22.34
21/01 2013	26.33	0	0	0	0	0	1.6	0	0.001	0.01	0.46	0	4.54	0	21.55
Time 02	26.33	0	0	0	0	0	1.592	0	0.004	0	0.24	0	5.21	0	21.09
Time 03	26.32	0	0	0	0	0	1.586	0	0	0.01	0.19	0	5.26	0	21.08
Time 04	26.25	0	0	0	0	0	1.574	0	0	0	0.51	0	4.85	0	21.06
Time 05	26.21	0	0	0	0	0	1.56	0	0	0	0.37	0	4.54	0	21.51
Time 06	25.9	0	0	0	0	0	1.544	0	0	0.01	0.62	0	3.34	0	22.17
Time 07	25.84	0	0	0	0	0	1.531	0	0	0.01	0.95	0.17	1.13	0	24.15
Time 08	25.23	0	0	0	0	0	1.516	0	0	0.02	0.52	3	0	0	27.85
Time 09	25.02	0	0	0	0	0	1.499	0	0	0.01	0.27	4.68	0	0	29.49
Time 10	25.13	0	0	0	0	0	1.492	0	0	0.01	0.39	4.78	0	0	29.53
Time 11	25.44	0	0	0	0	0	1.48	0	0	0.01	0.37	4.06	0	0	29.14
Time 12	25.62	0	0	0	0	0	1.482	0	0	0	0.4	3.07	0	0	28.31
Time 13	25.53	0	0	0	0	0	1.482	0	0	0.01	0.77	3.38	0	0	28.13
Time 14	25.66	0	0	0	0	0	1.488	0	0	0.01	0.48	2.5	0	0	27.73
Time 15	25.65	0	0	0	0	0	1.493	0	0	0	0.39	2.38	0	0	27.68
Time 16	25.82	0	0	0	0	0	1.487	0	0	0	0.51	2.02	0	0	27.41
Time 17	25.74	0	0	0	0	0	1.49	0	0	0.01	0.56	1.73	0	0	26.97
Time 18	25.5	0	0	0	0	0	1.49	0	0.001	0.01	1.13	2.81	0	0	27.32
Time 19	25.29	0	0	0	0	0	1.49	0	0	0	1.27	2.95	0	0	27.1
Time 20	25.5	0	0	0	0	0	1.489	0	0	0	1.7	2.5	0	0	26.39
Time 21	25.64	0	0	0	0	0	1.486	0	0	0	1.25	1.54	0	0	26.02
Time 22	25.68	0	0	0	0	0	1.48	0	0	0	1.18	0.79	0.05	0	25.4
Time 23	25.89	0	0	0	0	0	1.466	0	0	0	1.03	0.05	0.79	0	24.24
Time 24	25.97	0	0	0	0	0	1.469	0	0	0	0.77	0	2.35	0	23.02
22/01 2013	26.27	0	0	0	0	0	1.464	0	0	0.01	0.9	0	3.43	0	22.06
Time 02	26.36	0	0	0	0	0	1.466	0	0	0.01	0.8	0	4.15	0	21.52
Time 03	26.42	0	0	0	0	0	1.464	0	0.001	0	1.07	0	3.91	0	21.54
Time 04	26.52	0	0	0	0	0	1.463	0	0	0	1.77	0	3.41	0	21.51
Time 05	26.43	0	0	0	0	0	1.451	0	0	0.01	2.08	0	2.9	0	21.55
Time 06	25.94	0	0	0	0	0	1.446	0	0	0	1.64	0.05	1.99	0	22.47
Time 07	25.62	0	0	0	0	0	1.442	0	0	0	1.13	0.53	0.48	0	24.65
Time 08	25.19	0	0	0	0	0	1.435	0	0	0.01	0.9	3.14	0	0	27.54
Time 09	24.86	0	0	0	0	0	1.422	0	0	0	0.61	4.2	0	0	28.46
Time 10	25.21	0	0	0	0	0	1.421	0	0	0.02	0.63	4.01	0	0	28.63
Time 11	25.34	0	0	0	0	0	1.426	0	0	0.02	0.78	3.72	0	0	28.27
Time 12	25.47	0	0	0	0	0	1.42	0	0	0.02	0.93	3.05	0	0	27.63
Time 13	25.34	0	0	0	0	0	1.423	0	0	0	1.11	3	0	0	27.2
Time 14	25.38	0	0	0	0	0	1.433	0	0	0.01	0.68	2.45	0	0	27.19
Time 15	25.53	0	0	0	0	0	1.435	0	0	0	0.51	1.8	0	0	26.84
Time 16	25.7	0	0	0	0	0	1.435	0	0	0	0.65	0.79	0.02	0	25.89
Time 17	25.72	0	0	0	0	0	1.44	0	0	0	0.72	0.7	0	0	25.74
Time 18	25.33	0	0	0	0	0	1.44	0	0	0.01	0.98	1.9	0	0	26.34
Time 19	25.08	0	0	0	0	0	1.438	0	0	0.01	1.32	2.21	0	0	26.09
Time 20	25.1	0	0	0	0	0	1.43	0	0	0	1.83	2.42	0	0	25.78
Time 21	25.16	0	0	0	0	0	1.422	0	0	0	1.14	1.39	0	0	25.54
Time 22	25.28	0	0	0	0	0	1.416	0	0	0.01	1.1	0.77	0.02	0	25.02
Time 23	25.51	0	0	0	0	0	1.4	0	0	0	0.95	0.1	0.65	0	24.1
Time 24	25.85	0	0	0	0	0	1.386	0	0	0	0.61	0	2.38	0	22.96
23/01 2013	25.84	0	0	0	0	0	1.375	0	0	0	0.76	0	3.05	0	22.13
Time 02	26.15	0	0	0	0	0	1.361	0	0	0	0.8	0	3.55	0	21.82
Time 03	26.02	0	0	0	0	0	1.352	0	0	0	0.87	0	3.29	0	21.93
Time 04	25.99	0	0	0	0	0	1.351	0	0	0.02	1.59	0	2.45	0	22.03
Time 05	25.64	0	0	0	0	0	1.334	0	0	0	1.24	0	2.28	0	22.2
Time 06	25.37	0	0	0	0	0	1.325	0	0	0	1.5	0.12	0.94	0	23.15
Time 07	25.37	0	0	0	0	0	1.403	0	0	0	1.38	1.3	0.05	0	25.35
Time 08	24.69	0	0	0	0	0	1.704	0	0	0	1	4.34	0	0	28.38
Time 09	24.36	0	0	0	0	0	1.694	0	0	0	0.55	5.42	0	0	29.52
Time 10	24.55	0	0	0	0	0	1.681	0	0	0	0.58	5.54	0	0	29.76
Time 11	24.53	0	0	0	0	0	1.675	0	0	0.01	0.56	5.76	0	0	29.95
Time 12	24.54	0	0	0	0	0	1.662	0	0	0.02	0.86	5.64	0	0	29.54
Time 13	25.14	0	0	0	0	0	1.674	0	0	0	0.83	4.39	0	0	28.92
Time 14	25.42	0	0	0	0	0	1.682	0	0	0	0.63	3.5	0	0	28.49
Time 15	25.46	0	0	0	0	0	1.686	0	0	0	0.62	3.41	0	0	28.44
Time 16	25.43	0	0	0	0	0	1.685	0	0	0	0.69	2.78	0	0	27.76
Time 17	25.05	0	0	0	0	0	1.688	0	0	0	0.78	2.59	0	0	27.2
Time 18	24.75	0	0	0	0	0	1.691	0	0.001	0	1.09	3.55	0	0	27.55
Time 19	24.71	0	0	0	0	0	1.688	0	0	0	1.16	3.7	0	0	27.58
Time 20	24.87	0	0	0	0	0	1.696	0	0	0	1.62	3.77	0	0	27.35
Time 21	25	0	0	0	0	0	1.699	0	0	0	1.12	2.9	0	0	27.13
Time 22	25.06	0	0	0	0	0	1.699	0	0	0.01	1.14	2.06	0	0	26.38
Time 23	25.26	0	0	0	0	0	1.681	0	0	0	0.9	1.01	0	0	25.73
Time 24	25.45	0	0	0	0	0	1.676	0	0	0	0.6	0.12	0.53	0	24.82
24/01 2013	25.83	0	0	0	0	0	1.673	0	0	0.01	0.99	0	1.34	0	23.86
Time 02	25.61	0	0	0	0	0	1.654	0	0	0.01	0.61	0	1.82	0	23.54
Time 03	25.7	0	0	0	0	0	1.649	0	0	0.01	1	0.02	1.61	0	23.46
Time 04	25.7	0	0	0	0	0	1.643	0	0	0.01	1.79	0.12	0.84	0	23.54
Time 05	25.78	0	0	0	0	0	1.649	0	0	0	1.56	0.14	0.79	0	23.91
Time 06	25.8	0	0	0	0	0	1.649	0	0	0	1.4	0.41	0.41	0	24.72
Time 07	25.12	0	0	0	0	0	1.645	0	0	0	1.01	2.23	0	0	26.67
Time 08	23.98	0	0	0	0	0	1.634	0	0	0	0.81	6.24	0	0	29.62
Time 09	23.43	0	0	0	0	0	1.636	0	0	0	0.65	7.66	0	0	30.64
Time 10	24.2	0	0	0	0	0	1.643	0	0	0.03	0.6	6.74	0	0	30.52
Time 11	24.45	0	0	0	0	0	1.645	0	0	0.11	0.5	6.36	0	0	30.53
Time 12	24.29	0	0	0	0	0	1.652	0	0	0.09	0.81	5.98	0	0	29.7
Time 13	24.33	0	0	0	0	0	1.667	0	0	0	0.97	5.45	0	0	29.03
Time 14	24.66	0	0	0	0	0	1.674	0	0	0	0.6	4.06	0	0	28.33
Time 15	24.79	0	0	0	0	0	1.67	0	0	0	0.48	3.12	0	0	27.7
Time 16	24.67	0	0	0	0	0	1.679	0	0	0	0.6	2.26	0	0	26.68
Time 17	24.7	0	0	0	0	0	1.686	0	0	0	0.74	2.3	0	0	26.61
Time 18	24.36	0	0	0	0	0	1.688	0	0.001	0.01	0.93	3.72	0	0	27.49
Time 19	24.33	0	0	0	0	0	1.702	0	0	0.01	0.99	3.58	0	0	27.3
Time 20	24.64	0	0	0	0	0	1.7	0	0	0	1.37	3.5	0	0	27.16
Time 21	25.06	0	0	0	0	0	1.703	0	0	0	1.07	2.42	0	0	26.75
Time 22	25.28	0	0	0	0	0	1.687	0	0	0.01	1.14	1.73	0	0	26.2
Time 23	25.42	0	0	0	0	0	1.676	0	0	0	0.88	0.53	0.07	0	25.32
Time 24	25.37	0	0	0	0	0	1.666	0	0	0	0.56	0.05	0.98	0	24.25
25/01 2013	25.84	0	0	0	0	0	1.649	0	0	0.02	0.95	0	1.92	0	23.27
Time 02	26.04	0	0	0	0	0	1.646	0	0	0	0.57	0	3.05	0	22.71
Time 03	26.19	0	0	0	0	0	1.638	0	0	0.01	1.04	0	2.93	0	22.52
Time 04	26.24	0	0	0	0	0	1.628	0	0	0.03	1.7	0	2.35	0	22.48
Time 05	26.19	0	0	0	0	0	1.63	0	0	0	1.6	0	2.16	0	22.68
Time 06	26.05	0	0	0	0	0	1.639	0	0	0.01	1.44	0.14	1.42	0	23.6
Time 07	25.28	0	0	0	0	0	1.636	0	0	0	1.01	0.94	0.05	0	25.43
Time 08	24.38	0	0	0	0	0	1.642	0	0	0	0.73	4.85	0	0	28.74
Time 09	24.12	0	0	0	0	0	1.655	0	0	0	0.53	5.83	0	0	29.62
Time 10	24.33	0	0	0	0	0	1.542	0	0	0	0.57	5.42	0	0	29.4
Time 11	24.55	0	0	0	0	0	1.268	0	0	0.02	0.63	5.4	0	0	29.13
Time 12	24.26	0	0	0	0	0	1.273	0	0	0.01	0.87	5.5	0	0	28.75
Time 13	24.21	0	0	0	0	0	1.278	0	0	0	0.93	5.28	0	0	28.4
Time 14	24.51	0	0	0	0	0	1.285	0	0	0	0.62	4.25	0	0	28.01
Time 15	24.6	0	0	0	0	0	1.291	0	0	0	0.49	3.84	0	0	27.86
Time 16	24.61	0	0	0	0	0	1.289	0	0	0	0.57	2.86	0	0	26.82
Time 17	24.35	0	0	0	0	0	1.298	0	0	0	0.66	2.52	0	0	26.19
Time 18	24.27	0	0	0	0	0	1.3	0	0	0	0.83	2.71	0	0	26.14
Time 19	24.06	0	0	0	0	0	1.301	0	0	0.02	0.87	2.64	0	0	25.87
Time 20	23.99	0	0	0	0	0	1.296	0	0	0	0.88	2.52	0	0	25.66
Time 21	24.12	0	0	0	0	0	1.3	0	0	0	0.32	0.89	0	0	24.78
Time 22	24.51	0	0	0	0	0	1.302	0	0	0	0.38	0.14	0.19	0	24.17
Time 23	25.05	0	0	0	0	0	1.297	0	0	0.05	0.66	0	1.3	0	23.2
Time 24	24.63	0	0	0	0	0	1.294	0	0	0.04	0.61	0	1.85	0	22.29
26/01 2013	25.33	0	0	0	0	0	1.285	0	0	0.01	0.57	0	3.6	0	21.24
Time 02	25.25	0	0	0	0	0	1.288	0	0	0.01	0.57	0	3.91	0	20.81
Time 03	25.19	0	0	0	0	0	1.285	0	0	0	0.26	0	4.49	0	20.47
Time 04	25.37	0	0	0	0	0	1.286	0	0	0	0.28	0	4.82	0	20.28
Time 05	25.31	0	0	0	0	0	1.285	0	0	0	0.37	0	4.7	0	20.26
Time 06	25.32	0	0	0	0	0	1.288	0	0	0	0.6	0	4.34	0	20.37
Time 07	25.15	0	0	0	0	0	1.303	0	0	0	0.66	0	3.84	0	20.7
Time 08	24.95	0	0	0	0	0	1.31	0	0	0	0.99	0	2.62	0	21.46
Time 09	24.8	0	0	0	0	0	1.294	0.001	0	0	1.24	0.19	0.91	0	22.89
Time 10	24.83	0	0	0	0	0	0	0.018	0	0	1.34	1.68	0	0	23.93
Time 11	24.78	0	0	0	0	0	0	0.019	0	0	0.71	1.51	0	0	24.39
Time 12	24.78	0	0	0	0	0	0	0.018	0	0	0.67	1.39	0	0	24.25
Time 13	25	0	0	0	0	0	0	0.019	0	0.01	0.79	1.06	0	0	24.05
Time 14	24.77	0	0	0	0	0	0	0.018	0	0.01	0.81	1.42	0	0	24.16
Time 15	24.73	0	0	0	0	0	0	0.019	0	0	0.63	0.98	0	0	23.9
Time 16	24.73	0	0	0	0	0	0	0.018	0	0	0.51	0.36	0.02	0	23.35
Time 17	24.77	0	0	0	0	0	0	0.019	0	0	0.68	0.77	0	0	23.66
Time 18	24.28	0	0	0	0	0	0	0.018	0	0	0.79	2.02	0	0	24.33
Time 19	23.88	0	0	0	0	0	0	0.019	0	0	0.8	2.76	0	0	24.69
Time 20	24.17	0	0	0	0	0	0	0.018	0	0	0.77	2.09	0	0	24.29
Time 21	24.35	0	0	0	0	0	0	0.019	0	0	0.51	0.5	0.02	0	23.18
Time 22	24.83	0	0	0	0	0	0	0.018	0	0.01	0.68	0.12	0.58	0	22.54
Time 23	25.13	0	0	0	0	0	0	0.019	0	0	0.52	0	1.58	0	21.83
Time 24	25.24	0	0	0	0	0	0	0.019	0	0	0.5	0	2.28	0	21.27
27/01 2013	25.5	0	0	0	0	0	0	0.018	0	0	0.5	0	3.1	0	20.69
Time 02	25.17	0	0	0	0	0	0	0.019	0	0	0.5	0	3.19	0	20.32
Time 03	25.08	0	0	0	0	0	0	0.019	0	0	0.53	0	3.48	0	19.89
Time 04	25.29	0	0	0	0	0	0	0.019	0	0	0.59	0	3.91	0	19.57
Time 05	25.4	0	0	0	0	0	0	0.018	0	0	0.62	0	3.98	0	19.6
Time 06	25.51	0	0	0	0	0	0	0.019	0	0	0.64	0	3.89	0	19.8
Time 07	25.41	0	0	0	0	0	0	0.019	0	0	0.65	0	3.5	0	20.03
Time 08	25.07	0	0	0	0	0	0	0.018	0	0	0.77	0	2.42	0	20.72
Time 09	24.82	0	0	0	0	0	0	0.019	0	0.01	0.79	0	1.25	0	21.66
Time 10	25.09	0	0	0	0	0	0	0.019	0	0	0.61	0.02	0.98	0	22.28
Time 11	25.02	0	0	0	0	0	0	0.018	0	0	0.47	0.07	0.26	0	23.16
Time 12	25.02	0	0	0	0	0	0	0.019	0	0	0.45	0.02	0.05	0	23.33
Time 13	24.51	0	0	0	0	0	0	0.018	0	0	0.73	0.7	0.02	0	23.31
Time 14	24.85	0	0	0	0	0	0	0.019	0	0.01	0.75	0.5	0.02	0	23.42
Time 15	25.33	0	0	0	0	0	0	0.018	0	0	0.66	0.02	0.31	0	23.11
Time 16	25.05	0	0	0	0	0	0	0.019	0	0.01	1.22	0.41	0.24	0	22.81
Time 17	25.13	0	0	0	0	0	0	0.018	0	0	0.83	0.05	0.48	0	22.68
Time 18	24.84	0	0	0	0	0	0	0.019	0	0.01	0.94	0.31	0.14	0	22.88
Time 19	24.75	0	0	0	0	0	0	0.018	0	0	0.53	0.02	0.43	0	22.66
Time 20	24.66	0	0	0	0	0	0	0.018	0	0.01	1.01	0.36	0.22	0	22.62
Time 21	24.78	0	0	0	0	0	0	0.019	0	0	0.78	0	0.79	0	22.02
Time 22	25.24	0	0	0	0	0	0	0.019	0	0	1.42	0.02	1.18	0	21.47
Time 23	25.56	0	0	0	0	0	0	0.018	0	0	1.23	0	2.33	0	20.82
Time 24	25.33	0	0	0	0	0	0	0.019	0	0	0.59	0	3.84	0	19.7
28/01 2013	26.38	0	0	0	0	0	0	0.019	0	0.02	0.69	0	5.62	0	18.79
Time 02	26.81	0	0	0	0	0	0	0.018	0	0.01	0.63	0	6.48	0	18.34
Time 03	26.97	0	0	0	0	0	0	0.019	0	0	0.31	0	7.15	0	18.11
Time 04	26.83	0	0	0	0	0	0	0.019	0	0	0.51	0	6.91	0	18.1
Time 05	26.94	0	0	0	0	0	0	0.018	0	0	1.12	0	6.31	0	18.11
Time 06	26.53	0	0	0	0	0	0	0.019	0	0	0.84	0	5.76	0	18.59
Time 07	26.35	0	0	0	0	0	0	0.019	0	0.01	1.39	0	3.55	0	20.14
Time 08	25.52	0	0	0	0	0	0	0.018	0	0.01	1.15	0.29	0.41	0	22.96
Time 09	26.01	0	0	0	0	0	0	0.018	0	0.01	0.54	0.05	0.34	0	23.83
Time 10	26.43	0	0	0	0	0	0.072	0.016	0	0.01	0.68	0.02	0.89	0	23.59
Time 11	26.57	0	0	0	0	0	0.48	0	0	0.01	0.67	0	1.39	0	23.58
Time 12	26.61	0	0	0	0	0	0.491	0	0	0	0.67	0	1.49	0	23.53
Time 13	26.74	0	0	0	0	0	0.707	0	0	0	1.09	0	1.34	0	23.59
Time 14	26.83	0	0	0	0	0	0.24	0	0.001	0	0.73	0	1.49	0	23.38
Time 15	26.85	0	0	0	0	0	0.241	0	0	0	0.64	0	1.61	0	23.46
Time 16	26.65	0	0	0	0	0	0.239	0	0.001	0	0.69	0	2.04	0	22.79
Time 17	26.65	0	0	0	0	0	0.238	0	0.002	0	0.79	0	2.42	0	22.36
Time 18	26.55	0	0	0	0	0	0.241	0	0.002	0	1.08	0	2.02	0	22.3
Time 19	26.47	0	0	0	0	0	0.236	0	0.001	0.01	1.1	0	2.42	0	21.88
Time 20	26.49	0	0	0	0	0	0.24	0	0.002	0	1.58	0	2.21	0	21.62
Time 21	26.21	0	0	0	0	0	0.24	0	0.002	0	1.32	0	2.57	0	21.29
Time 22	26.39	0	0	0	0	0	0.247	0	0.001	0	1.17	0	3.53	0	20.62
Time 23	26.85	0	0	0	0	0	0.274	0	0.004	0	1.09	0	5.02	0	19.65
Time 24	27.23	0	0	0	0	0	0.299	0	0.006	0	0.73	0	6.82	0	18.6
29/01 2013	27.33	0	0	0	0	0	0.336	0	0.006	0	1.27	0	7.06	0	17.93
Time 02	27.41	0	0	0	0	0	0.371	0	0.008	0	1.63	0	7.13	0	17.6
Time 03	27.39	0	0	0	0	0	0.41	0	0.008	0	1.66	0	7.27	0	17.45
Time 04	27.49	0	0	0	0	0	0.448	0	0.001	0	1.07	0	8.21	0	17.22
Time 05	27.49	0	0	0	0	0	0.494	0	0.006	0	1.96	0	6.96	0	17.62
Time 06	26.98	0	0	0	0	0	0.536	0	0.008	0	2.36	0	5.54	0	18.26
Time 07	26.52	0	0	0	0	0	0.598	0	0.005	0	1.02	0	5.09	0	19.68
Time 08	26.36	0	0	0	0	0	0.652	0	0	0.01	0.62	0	2.57	0	22.46
Time 09	6.02	0	0	0	0	0	0.473	0.012	0.008	0.03	0.17	18.53	0.05	0	23.33
Time 10	24.4	0	0	0	0	0	0.76	0	0.01	0	0.49	0.12	0.41	0	22.88
Time 11	24.64	0	0	0	0	0	0.898	0	0.048	0.01	0.43	0	0.94	0	22.61
Time 12	25.54	0	0	0	0	0	1.036	0	0.252	0.01	0.42	0	2.47	0	22.06
Time 13	25.87	0	0	0	0	0	1.144	0	0.296	0.01	0.81	0	2.81	0	21.8
Time 14	26.43	0	0	0	0	0	1.295	0	0.283	0.03	0.7	0	3.5	0	21.85
Time 15	26.44	0	0	0	0	0	1.41	0	0.324	0.01	0.49	0	3.84	0	21.82
Time 16	26.35	0	0	0	0	0	1.597	0	0.437	0.01	0.46	0	4.39	0	21.34
Time 17	26.1	0	0	0	0	0	1.778	0	0.473	0	0.58	0	4.54	0	21.05
Time 18	26.18	0	0	0	0	0	1.843	0	0.365	0	1.14	0	4.01	0	21.17
Time 19	26.06	0	0	0	0	0	1.908	0	0.398	0.01	1.18	0	4.2	0	20.91
Time 20	26.11	0	0	0	0	0	1.904	0	0.426	0	1.58	0	3.84	0	20.9
Time 21	25.9	0	0	0	0	0	1.892	0	0.577	0	1.16	0	4.63	0	20.31
Time 22	26.07	0	0	0	0	0	1.861	0	0.5	0.01	1.21	0	5.21	0	19.94
Time 23	26.18	0	0	0	0	0	1.865	0	0.454	0	1.03	0	6.5	0	18.96
Time 24	26.08	0	0	0	0	0	1.913	0	0.512	0	0.84	0	7.75	0	17.8
30/01 2013	23.95	0	0	0	0	0	2.023	0	0.493	0	0.85	0	6.79	0	17.05
Time 02	23.92	0	0	0	0	0	2.207	0	0.553	0	1.03	0	7.1	0	16.64
Time 03	24.21	0	0	0	0	0	2.52	0	0.658	0	1.33	0	7.92	0	16.07
Time 04	24.37	0	0	0	0	0	3.013	0	0.725	0.01	2.03	0	7.8	0	16.07
Time 05	24.41	0	0	0	0	0	3.524	0	0.808	0	1.56	0	8.62	0	16.21
Time 06	24.44	0	0	0	0	0	3.983	0	0.72	0	2.03	0	8.09	0	16.73
Time 07	24.15	0	0	0	0	0	4.222	0	0.634	0	0.99	0	7.32	0	18.46
Time 08	24.36	0	0	0	0	0	4.286	0	0.38	0.01	0.7	0	4.99	0	21.4
Time 09	26.62	0	0	0	0	0	4.3	0	0.23	0.01	0.46	0	6.24	0	22.37
Time 10	27.14	0	0	0	0	0	4.267	0	0.245	0.02	0.52	0	7.2	0	21.75
Time 11	26.94	0	0	0	0	0	4.223	0	0.236	0.03	0.57	0	6.82	0	21.92
Time 12	26.81	0	0	0	0	0	4.192	0	0.428	0.02	0.8	0	7.01	0	21.3
Time 13	27.03	0	0	0	0	0	4.19	0	0.338	0	0.87	0	7.1	0	21.33
Time 14	27.06	0	0	0	0	0	4.194	0	0.322	0.01	0.54	0	7.42	0	21.41
Time 15	26.84	0	0	0	0	0	4.198	0	0.341	0	0.42	0	7.66	0	21.06
Time 16	26.91	0	0	0	0	0	4.157	0	0.373	0.01	0.49	0	8.06	0	20.63
Time 17	26.71	0	0	0	0	0	4.192	0	0.427	0.01	0.59	0	8.06	0	20.39
Time 18	26.67	0	0	0	0	0	4.248	0	0.378	0	1.24	0	7.2	0	20.68
Time 19	26.39	0	0	0	0	0	4.415	0	0.45	0	1.32	0	7.01	0	20.74
Time 20	26.67	0	0	0	0	0	4.714	0	0.475	0	1.82	0	6.89	0	20.83
Time 21	26.7	0	0	0	0	0	5.256	0	0.594	0	1.27	0	8.45	0	20.34
Time 22	26.73	0	0	0	0	0	5.408	0	0.65	0	1.31	0	9.05	0	19.84
Time 23	27.2	0	0	0	0	0	5.413	0	0.683	0	1.24	0	10.39	0	18.95
Time 24	27.59	0	0	0	0	0	5.429	0	0.745	0	0.82	0	12.19	0	17.82
31/01 2013	28.16	0	0	0	0	0	5.432	0	0.839	0	0.87	0	13.68	0	16.73
Time 02	28.35	0	0	0	0	0	5.431	0	0.866	0	1.08	0	14.06	0	16.21
Time 03	28.41	0	0	0	0	0	5.431	0	0.889	0	1.39	0	14.14	0	15.95
Time 04	28.57	0	0	0	0	0	5.437	0	0.872	0	1.88	0	13.8	0	15.88
Time 05	28.54	0	0	0	0	0	5.435	0	0.823	0	1.84	0	13.46	0	16.31
Time 06	27.87	0	0	0	0	0	5.432	0	0.854	0	1.69	0	12.62	0	16.77
Time 07	27.64	0	0	0	0	0	5.431	0	0.648	0	0.92	0	11.52	0	18.49
Time 08	27.32	0	0	0	0	0	5.431	0	0.532	0.01	0.6	0	8.88	0	21.19
Time 09	27.18	0	0	0	0	0	3.79	0.006	0.318	0.01	0.4	0	6.34	0	22.35
Time 10	27.66	0	0	0	0	0	0	0.018	0	0.01	0.41	0	3.6	0	22.04
Time 11	27.65	0	0	0	0	0	0	0.018	0	0.02	0.45	0	3.65	0	21.9
Time 12	27.54	0	0	0	0	0	0	0.018	0	0.04	0.65	0	4.06	0	21.27
Time 13	26.9	0	0	0	0	0	0	0.018	0	0.01	0.7	0	3.77	0	20.87
Time 14	27.12	0	0	0	0	0	5.035	0.001	0.146	0.01	0.48	0	9.02	0	20.58
Time 15	26.85	0	0	0	0	0	5.414	0	0.271	0	0.38	0	9.02	0	20.79
Time 16	26.8	0	0	0	0	0	5.418	0	0.361	0.01	0.46	0	9.62	0	20.08
Time 17	27.37	0	0	0	0	0	5.418	0	0.282	0	0.56	0	9.94	0	20.18
Time 18	27.32	0	0	0	0	0	5.39	0	0.232	0	1.19	0	9.84	0	19.59
Time 19	25.85	0	0	0	0	0	5.384	0	0.295	0	1.31	0	8.26	0	19.87
Time 20	25.26	0	0	0	0	0	5.382	0	0.308	0	1.74	0	7.13	0	20.04
Time 21	26.65	0	0	0	0	0	5.38	0	0.214	0	1.3	0	7.46	0	21.35
Time 22	26.87	0	0	0	0	0	5.371	0	0.338	0	1.21	0	7.87	0	21.21
Time 23	27.16	0	0	0	0	0	5.3	0	0.437	0	1.02	0	8.83	0	20.54
Time 24	27.2	0	0	0	0	0	5.172	0	0.44	0	0.75	0	9.98	0	19.59
01/02 2013	27.21	0	0	0	0	0	5.021	0	0.42	0	1.06	0	10.3	0	18.86
Time 02	27.37	0	0	0	0	0	4.894	0	0.402	0	0.79	0	10.78	0	18.64
Time 03	27.35	0	0	0	0	0	4.777	0	0.508	0	1.19	0	10.49	0	18.4
Time 04	27.41	0	0	0	0	0	4.654	0	0.467	0	1.86	0	9.7	0	18.5
Time 05	27.2	0	0	0	0	0	4.519	0	0.42	0	1.74	0	9.29	0	18.73
Time 06	26.79	0	0	0	0	0	4.412	0	0.301	0	1.68	0	7.94	0	19.78
Time 07	26.68	0	0	0	0	0	4.301	0	0.115	0.01	0.91	0	6.38	0	21.89
Time 08	26.01	0	0	0	0	0	4.187	0	0.007	0.01	0.57	0	3.46	0	24.52
Time 09	25.72	0	0	0	0	0	4.09	0	0	0	0.34	0	2.14	0	25.64
Time 10	26	0	0	0	0	0	2.608	0.007	0	0.03	0.33	0.46	1.49	0	25.66
Time 11	26.16	0	0	0	0	0	0	0.018	0	0.05	0.31	1.13	0	0	25.48
Time 12	26.34	0	0	0	0	0	0	0.018	0	0.08	0.67	0.74	0.07	0	24.91
Time 13	26.81	0	0	0	0	0	0	0.018	0	0.02	0.86	0.34	0.31	0	24.42
Time 14	27.05	0	0	0	0	0	3.995	0.002	0.232	0.03	0.38	0	5.16	0	23.58
Time 15	27.13	0	0	0	0	0	4.482	0	0.299	0.03	0.3	0	6.1	0	23.28
Time 16	27.07	0	0	0	0	0	4.39	0	0.418	0.04	0.45	0	6.86	0	22.24
Time 17	26.77	0	0	0	0	0	4.075	0	0.336	0.03	0.55	0	6.55	0	21.94
Time 18	26.51	0	0	0	0	0	3.473	0	0.14	0.02	1.05	0	4.73	0	22.5
Time 19	26	0	0	0	0	0	3.396	0	0.17	0.02	0.83	0	4.1	0	22.85
Time 20	25.7	0	0	0	0	0	3.306	0	0.209	0.01	1.03	0	3.53	0	22.88
Time 21	25.83	0	0	0	0	0	3.208	0	0.258	0.01	1.04	0	3.96	0	22.44
Time 22	26.15	0	0	0	0	0	3.076	0	0.118	0.01	0.87	0	4.75	0	22.04
Time 23	26.26	0	0	0	0	0	3.041	0	0.18	0.01	0.38	0	5.76	0	21.5
Time 24	26.34	0	0	0	0	0	3.001	0	0.223	0.04	0.51	0	6.17	0	21.07
02/02 2013	26.23	0	0	0	0	0	2.94	0	0.266	0.04	0.26	0	6.94	0	20.43
Time 02	26.23	0	0	0	0	0	2.874	0	0.247	0.05	0.22	0	7.22	0	20.09
Time 03	26.44	0	0	0	0	0	2.776	0	0.402	0.02	0.11	0	7.58	0	19.92
Time 04	26.47	0	0	0	0	0	2.737	0	0.289	0	0.43	0	7.42	0	19.73
Time 05	26.43	0	0	0	0	0	2.713	0	0.246	0.01	0.28	0	7.58	0	19.69
Time 06	26.28	0	0	0	0	0	2.674	0	0.21	0.01	0.4	0	7.1	0	19.87
Time 07	26.16	0	0	0	0	0	2.623	0	0.272	0.02	0.66	0	6.17	0	20.45
Time 08	25.64	0	0	0	0	0	2.579	0	0.211	0.02	0.41	0	4.82	0	21.47
Time 09	25.71	0	0	0	0	0	2.546	0	0.006	0.02	0.35	0	3.77	0	22.66
Time 10	25.8	0	0	0	0	0	2.549	0	0	0.07	0.55	0	2.71	0	23.66
Time 11	25.9	0	0	0	0	0	2.54	0	0	0.01	0.2	0	2.54	0	24.15
Time 12	26.08	0	0	0	0	0	2.528	0	0	0.01	0.25	0	3.34	0	23.42
Time 13	26.22	0	0	0	0	0	2.52	0	0.01	0.02	0.46	0	4.15	0	22.53
Time 14	26.19	0	0	0	0	0	2.508	0	0.032	0.01	0.44	0	5.18	0	21.51
Time 15	26.38	0	0	0	0	0	2.49	0	0.023	0.02	0.59	0	5.88	0	20.83
Time 16	26.4	0	0	0	0	0	2.444	0	0.064	0.02	0.3	0	6.38	0	20.54
Time 17	26.39	0	0	0	0	0	2.392	0	0.04	0	0.33	0	5.98	0	20.91
Time 18	25.92	0	0	0	0	0	2.35	0	0.001	0.01	0.88	0	4.15	0	21.75
Time 19	25.75	0	0	0	0	0	2.294	0	0.001	0.02	0.69	0	3.6	0	22.25
Time 20	25.61	0	0	0	0	0	2.249	0	0.034	0.01	0.23	0	3.79	0	22.34
Time 21	25.75	0	0	0	0	0	2.191	0	0.044	0.01	0.16	0	4.61	0	21.7
Time 22	25.78	0	0	0	0	0	2.18	0	0.078	0.02	0.3	0	5.11	0	21.04
Time 23	26.2	0	0	0	0	0	2.136	0	0.073	0	0.11	0	6.05	0	20.66
Time 24	26.04	0	0	0	0	0	2.105	0	0.125	0	0.18	0	6.41	0	20.03
03/02 2013	26.22	0	0	0	0	0	2.076	0	0.274	0	0.21	0	7.01	0	19.5
Time 02	26.45	0	0	0	0	0	2.024	0	0.098	0	0.23	0	7.54	0	19.13
Time 03	26.59	0	0	0	0	0	1.997	0	0.056	0	0.24	0	7.68	0	19.07
Time 04	26.79	0	0	0	0	0	1.955	0	0.076	0	0.2	0	7.82	0	19.09
Time 05	26.68	0	0	0	0	0	1.914	0	0.034	0	0.23	0	7.68	0	19.05
Time 06	26.55	0	0	0	0	0	1.877	0	0.054	0	0.18	0	7.44	0	19.21
Time 07	26.27	0	0	0	0	0	1.842	0	0.091	0	0.16	0	6.94	0	19.4
Time 08	26.28	0	0	0	0	0	1.825	0	0.055	0.02	0.25	0	6.38	0	19.95
Time 09	26.21	0	0	0	0	0	1.802	0	0.005	0.01	0.13	0	5.54	0	20.75
Time 10	26.29	0	0	0	0	0	1.782	0	0	0	0.16	0	4.51	0	21.9
Time 11	26.23	0	0	0	0	0	1.745	0	0	0	0.3	0	3.43	0	22.71
Time 12	26.15	0	0	0	0	0	1.734	0	0	0	0.78	0	2.74	0	22.93
Time 13	25.89	0	0	0	0	0	1.71	0	0	0	0.84	0	2.59	0	22.69
Time 14	26.14	0	0	0	0	0	1.699	0	0.001	0.01	0.42	0	3.62	0	22.35
Time 15	26.37	0	0	0	0	0	1.685	0	0.002	0.01	0.42	0	4.13	0	22.02
Time 16	26.32	0	0	0	0	0	1.672	0	0.022	0.01	0.42	0	4.46	0	21.62
Time 17	26.47	0	0	0	0	0	1.649	0	0.002	0.01	0.45	0	4.75	0	21.41
Time 18	26.32	0	0	0	0	0	1.625	0	0	0.01	0.45	0	4.15	0	21.85
Time 19	26	0	0	0	0	0	1.624	0	0.062	0.01	0.69	0	3.31	0	22.14
Time 20	25.73	0	0	0	0	0	1.62	0	0.029	0	0.8	0	2.86	0	22.28
Time 21	25.83	0	0	0	0	0	1.577	0	0.058	0.01	0.55	0	3.53	0	21.87
Time 22	26.24	0	0	0	0	0	1.574	0	0.034	0.01	0.69	0	4.22	0	21.4
Time 23	26.48	0	0	0	0	0	1.56	0	0.078	0.01	0.15	0	5.69	0	20.69
Time 24	26.79	0	0	0	0	0	1.541	0	0.1	0.02	0.26	0	6.86	0	19.61
04/02 2013	26.89	0	0	0	0	0	1.506	0	0.119	0.01	0.3	0	7.7	0	18.79
Time 02	26.96	0	0	0	0	0	1.494	0	0.151	0.01	0.27	0	8.3	0	18.24
Time 03	27	0	0	0	0	0	1.486	0	0.155	0	0.26	0	8.33	0	18.22
Time 04	27.08	0	0	0	0	0	1.459	0	0.046	0	0.69	0	8.26	0	17.92
Time 05	27.02	0	0	0	0	0	1.446	0	0.01	0	0.35	0	8.26	0	18.24
Time 06	27.08	0	0	0	0	0	1.433	0	0.065	0	0.47	0	7.75	0	18.6
Time 07	26.47	0	0	0	0	0	1.414	0	0	0.01	0.75	0	5.16	0	20.53
Time 08	25.89	0	0	0	0	0	1.394	0	0	0.03	0.55	0.02	1.25	0	24.02
Time 09	25.68	0	0	0	0	0	1.391	0	0	0.02	0.43	0.05	0.43	0	24.79
Time 10	25.98	0	0	0	0	0	1.39	0	0	0.04	0.42	0	1.03	0	24.46
Time 11	26.3	0	0	0	0	0	1.385	0	0	0.07	0.41	0	1.66	0	24.15
Time 12	26.5	0	0	0	0	0	1.393	0	0	0.02	0.44	0	2.06	0	23.83
Time 13	26.63	0	0	0	0	0	1.396	0	0	0.02	0.79	0	1.9	0	23.84
Time 14	26.69	0	0	0	0	0	1.392	0	0	0.01	0.49	0	2.5	0	23.53
Time 15	26.34	0	0	0	0	0	1.394	0	0.019	0	0.41	0	2.42	0	23.35
Time 16	26.19	0	0	0	0	0	1.376	0	0.026	0.01	0.48	0	3.31	0	22.3
Time 17	26.26	0	0	0	0	0	1.386	0	0.016	0	0.57	0	3.58	0	22.01
Time 18	26.37	0	0	0	0	0	1.404	0	0	0.01	0.63	0	3.48	0	22.1
Time 19	26.2	0	0	0	0	0	1.394	0	0.013	0	0.66	0	3.31	0	22.11
Time 20	26.14	0	0	0	0	0	1.374	0	0.028	0	0.97	0	3.05	0	22
Time 21	25.79	0	0	0	0	0	1.362	0	0.085	0	0.71	0	3.38	0	21.63
Time 22	25.76	0	0	0	0	0	1.337	0	0.038	0	0.52	0	3.98	0	21.15
Time 23	26.24	0	0	0	0	0	1.32	0	0.02	0	0.7	0	5.33	0	20.07
Time 24	26.27	0	0	0	0	0	1.325	0	0.08	0	0.28	0	6.62	0	19.19
05/02 2013	26.84	0	0	0	0	0	1.303	0	0	0.02	0.29	0	7.85	0	18.46
Time 02	26.92	0	0	0	0	0	1.294	0	0.002	0.01	0.36	0	8.35	0	17.92
Time 03	26.46	0	0	0	0	0	1.288	0	0.086	0	0.36	0	8.11	0	17.76
Time 04	26.44	0	0	0	0	0	1.271	0	0.006	0	0.82	0	7.61	0	17.78
Time 05	26.32	0	0	0	0	0	1.254	0	0.05	0	1.05	0	6.98	0	18.07
Time 06	25.89	0	0	0	0	0	1.249	0	0.061	0	0.9	0	6.31	0	18.58
Time 07	26.09	0	0	0	0	0	1.24	0	0.004	0	1.42	0	4.03	0	20.53
Time 08	26.12	0	0	0	0	0	1.243	0	0.043	0.02	0.69	0	2.09	0	23.21
Time 09	25.97	0	0	0	0	0	1.231	0	0.052	0.01	0.54	0	1.78	0	23.51
Time 10	26.02	0	0	0	0	0	1.224	0	0.031	0.01	0.53	0	1.9	0	23.43
Time 11	25.46	0	0	0	0	0	1.212	0	0.08	0.02	0.48	0	1.39	0	23.47
Time 12	25.75	0	0	0	0	0	1.195	0	0.066	0.02	0.67	0	1.78	0	23.1
Time 13	26.22	0	0	0	0	0	1.198	0	0.035	0.01	0.74	0	2.59	0	22.69
Time 14	26.36	0	0	0	0	0	1.183	0	0.034	0.02	0.46	0	3.43	0	22.22
Time 15	26.04	0	0	0	0	0	1.172	0	0.042	0.01	0.34	0	2.52	0	22.92
Time 16	25.77	0	0	0	0	0	1.153	0	0.185	0.02	0.43	0	2.66	0	22.47
Time 17	26.28	0	0	0	0	0	1.144	0	0.168	0.01	0.52	0	3.46	0	22.04
Time 18	26.45	0	0	0	0	0	1.122	0	0.065	0.01	0.55	0	3.31	0	22.31
Time 19	25.71	0	0	0	0	0	1.104	0	0.142	0.01	0.54	0	2.42	0	22.51
Time 20	25.66	0	0	0	0	0	1.076	0	0.158	0	0.77	0	2.23	0	22.43
Time 21	25.68	0	0	0	0	0	1.05	0	0.122	0	0.32	0	2.95	0	22.15
Time 22	25.99	0	0	0	0	0	1.02	0	0.005	0.02	0.88	0	2.86	0	21.96
Time 23	25.99	0	0	0	0	0	0.99	0	0.082	0	0.66	0	4.13	0	20.9
Time 24	26	0	0	0	0	0	0.935	0	0.134	0	0.29	0	5.33	0	20
06/02 2013	26.46	0	0	0	0	0	0.899	0	0.089	0.02	0.34	0	6.43	0	19.24
Time 02	26.76	0	0	0	0	0	0.862	0	0.055	0	0.42	0	6.96	0	18.89
Time 03	26.37	0	0	0	0	0	0.832	0	0.115	0.02	0.56	0	6.62	0	18.69
Time 04	26.11	0	0	0	0	0	0.81	0	0.085	0.01	0.92	0	5.81	0	18.88
Time 05	26.01	0	0	0	0	0	0.788	0	0.011	0	0.92	0	5.4	0	19.18
Time 06	25.65	0	0	0	0	0	0.767	0	0.006	0.01	0.8	0	4.37	0	20
Time 07	25.46	0	0	0	0	0	0.754	0	0.002	0.01	0.8	0	2.28	0	21.91
Time 08	25.56	0	0	0	0	0	0.758	0	0.019	0.03	0.59	0.72	0.29	0	24.89
Time 09	25.18	0	0	0	0	0	0.772	0	0.011	0.01	0.36	1.2	0	0	25.45
Time 10	25.59	0	0	0	0	0	0.809	0	0.006	0.03	0.4	0.74	0	0	25.43
Time 11	25.83	0	0	0	0	0	0.838	0	0.01	0.07	0.48	0.72	0.05	0	25.49
Time 12	25.94	0	0	0	0	0	0.835	0	0.05	0.07	0.77	0.41	0.5	0	24.56
Time 13	26.15	0	0	0	0	0	0.85	0	0.032	0.03	0.74	0.05	1.1	0	23.81
Time 14	26.29	0	0	0	0	0	0.883	0	0.06	0.02	0.46	0	2.23	0	23.1
Time 15	26.57	0	0	0	0	0	0.914	0	0.088	0.01	0.34	0	3.36	0	22.34
Time 16	26.33	0	0	0	0	0	0.98	0	0.115	0	0.42	0	3.36	0	22.18
Time 17	26.14	0	0	0	0	0	0.97	0	0.076	0.01	0.49	0	3.43	0	21.8
Time 18	26.19	0	0	0	0	0	0.948	0	0.004	0.01	0.5	0	2.83	0	22.47
Time 19	25.53	0	0	0	0	0	0.866	0	0.049	0.02	0.42	0	2.28	0	22.41
Time 20	25.37	0	0	0	0	0	0.804	0	0.103	0	0.57	0	1.8	0	22.54
Time 21	25.8	0	0	0	0	0	0.745	0	0.076	0	0.83	0	2.02	0	22.38
Time 22	25.7	0	0	0	0	0	0.692	0	0.062	0.01	0.79	0	2.33	0	21.98
Time 23	25.79	0	0	0	0	0	0.632	0	0.037	0	0.54	0	2.88	0	21.76
Time 24	26.12	0	0	0	0	0	0.581	0	0.046	0	0.3	0	4.66	0	20.47
07/02 2013	26.47	0	0	0	0	0	0.566	0	0.028	0.02	0.65	0	5.14	0	19.91
Time 02	26.38	0	0	0	0	0	0.55	0	0.064	0.02	0.18	0	5.88	0	19.55
Time 03	26.16	0	0	0	0	0	0.557	0	0.019	0.02	0.53	0	5.52	0	19.41
Time 04	26.26	0	0	0	0	0	0.552	0	0.029	0.01	1.13	0	4.82	0	19.57
Time 05	25.98	0	0	0	0	0	0.524	0	0.025	0	0.94	0	4.27	0	20.06
Time 06	25.65	0	0	0	0	0	0.493	0	0.029	0.01	0.85	0	3.34	0	20.74
Time 07	25.16	0	0	0	0	0	0.469	0	0.007	0.01	0.83	0.17	1.08	0	22.75
Time 08	24.78	0	0	0	0	0	0.83	0	0.007	0.02	0.64	2.38	0	0	26.05
Time 09	24.75	0	0	0	0	0	1.225	0	0.006	0.01	0.46	2.78	0	0	27.01
Time 10	24.84	0	0	0	0	0	1.231	0	0.012	0.06	0.4	2.57	0	0	26.94
Time 11	25.04	0	0	0	0	0	1.266	0	0.008	0.05	0.4	2.09	0	0	26.69
Time 12	25.22	0	0	0	0	0	1.289	0	0.017	0.08	0.82	1.34	0	0	25.66
Time 13	25.34	0	0	0	0	0	1.328	0	0.032	0.02	0.75	0.58	0.1	0	25.06
Time 14	25.54	0	0	0	0	0	1.394	0	0.04	0.02	0.39	0	0.72	0	24.47
Time 15	25.6	0	0	0	0	0	1.435	0	0.056	0	0.3	0	1.49	0	23.85
Time 16	25.3	0	0	0	0	0	1.457	0	0.143	0.02	0.4	0	1.9	0	23.13
Time 17	25.27	0	0	0	0	0	1.458	0	0.085	0.01	0.52	0	2.02	0	22.87
Time 18	25.2	0	0	0	0	0	1.42	0	0.011	0	0.51	0.02	1.13	0	23.68
Time 19	24.94	0	0	0	0	0	1.337	0	0.006	0.01	0.56	0.12	0.62	0	23.92
Time 20	24.63	0	0	0	0	0	1.272	0	0.037	0	0.87	0.48	0.07	0	24.2
Time 21	24.72	0	0	0	0	0	1.222	0	0.074	0.01	0.58	0.02	0.55	0	23.61
Time 22	24.93	0	0	0	0	0	1.184	0	0.007	0.01	0.61	0	1.1	0	23.17
Time 23	24.9	0	0	0	0	0	1.135	0	0.058	0.01	0.46	0	1.8	0	22.6
Time 24	25.14	0	0	0	0	0	1.106	0	0.028	0	0.2	0	3.07	0	21.75
08/02 2013	25.72	0	0	0	0	0	1.099	0	0.006	0.02	0.33	0	4.08	0	21.15
Time 02	25.7	0	0	0	0	0	1.091	0	0.011	0.01	0.41	0	4.39	0	20.75
Time 03	25.81	0	0	0	0	0	1.105	0	0.007	0.02	0.25	0	4.66	0	20.72
Time 04	25.76	0	0	0	0	0	1.079	0	0.006	0.01	1.01	0	3.72	0	20.86
Time 05	25.55	0	0	0	0	0	1.075	0	0.038	0	1.05	0	3.26	0	21.05
Time 06	25.21	0	0	0	0	0	1.061	0	0.024	0	0.98	0	2.21	0	21.88
Time 07	24.88	0	0	0	0	0	1.058	0	0.004	0	0.82	0.46	0.46	0	23.91
Time 08	24.48	0	0	0	0	0	1.052	0	0.001	0.03	0.58	3.48	0	0	27.18
Time 09	24.25	0	0	0	0	0	1.048	0	0	0.03	0.45	4.9	0	0	28.42
Time 10	24.36	0	0	0	0	0	1.038	0	0	0.07	0.35	4.73	0	0	28.5
Time 11	24.55	0	0	0	0	0	1.046	0	0.001	0.09	0.39	3.98	0	0	27.92
Time 12	24.76	0	0	0	0	0	1.061	0	0.007	0.07	0.18	2.66	0	0	27
Time 13	24.88	0	0	0	0	0	1.102	0	0.007	0.05	0.2	1.63	0	0	26.09
Time 14	24.93	0	0	0	0	0	1.184	0	0.008	0.05	0.36	1.06	0	0	25.5
Time 15	24.85	0	0	0	0	0	1.225	0	0.026	0.02	0.26	0.31	0.05	0	24.79
Time 16	24.96	0	0	0	0	0	1.246	0	0.036	0.02	0.78	0.02	0.77	0	23.43
Time 17	25	0	0	0	0	0	1.28	0	0.006	0.01	0.77	0.02	1.27	0	22.98
Time 18	25.03	0	0	0	0	0	1.264	0	0.001	0.01	0.6	0.05	0.82	0	23.68
Time 19	24.12	0	0	0	0	0	1.204	0	0.028	0.01	0.58	0.86	0	0	24.42
Time 20	24.2	0	0	0	0	0	1.162	0	0.016	0.01	0.49	0.91	0	0	24.61
Time 21	24.29	0	0	0	0	0	1.105	0	0.014	0.01	0.54	0.6	0	0	24.24
Time 22	24.49	0	0	0	0	0	1.045	0	0.028	0.04	0.42	0.14	0.26	0	23.89
Time 23	24.69	0	0	0	0	0	1.013	0	0.035	0.03	0.13	0	1.18	0	23.21
Time 24	24.94	0	0	0	0	0	0.995	0	0.011	0.04	0.25	0	2.04	0	22.52
09/02 2013	25.09	0	0	0	0	0	0.976	0	0.031	0.04	0.3	0	2.69	0	21.92
Time 02	25.2	0	0	0	0	0	0.978	0	0.002	0.09	0.18	0	3.43	0	21.46
Time 03	25.5	0	0	0	0	0	0.964	0	0.004	0.07	0.07	0	3.74	0	21.48
Time 04	25.25	0	0	0	0	0	0.956	0	0.018	0.03	0.27	0	3.22	0	21.54
Time 05	25.19	0	0	0	0	0	0.953	0	0.007	0.02	0.15	0	3.1	0	21.73
Time 06	24.99	0	0	0	0	0	0.952	0	0.007	0.03	0.19	0	2.69	0	21.92
Time 07	24.77	0	0	0	0	0	0.946	0	0.014	0.01	0.27	0	1.87	0	22.43
Time 08	24.12	0	0	0	0	0	0.944	0	0.004	0.04	0.65	0.55	0.41	0	23.46
Time 09	23.91	0	0	0	0	0	0.946	0	0.002	0.04	0.51	1.44	0	0	24.7
Time 10	24.1	0	0	0	0	0	0.947	0	0.002	0.08	0.5	2.16	0	0	25.58
Time 11	24.08	0	0	0	0	0	0.96	0	0.002	0.03	0.17	2.42	0	0	26.12
Time 12	24.1	0	0	0	0	0	0.989	0	0.002	0.02	0.19	1.73	0	0	25.4
Time 13	24.19	0	0	0	0	0	1.037	0	0.008	0.04	0.44	1.18	0	0	24.81
Time 14	24.08	0	0	0	0	0	1.09	0	0.007	0.03	0.31	0.31	0.14	0	23.83
Time 15	24	0	0	0	0	0	1.176	0	0.024	0.01	0.28	0	0.82	0	22.91
Time 16	24.34	0	0	0	0	0	1.236	0	0.032	0.05	0.43	0.02	1.42	0	22.58
Time 17	24.41	0	0	0	0	0	1.23	0	0	0.03	0.29	0	1.2	0	23.03
Time 18	24.19	0	0	0	0	0	1.177	0	0.014	0.02	0.69	0.58	0.12	0	23.93
Time 19	23.5	0	0	0	0	0	1.103	0	0.012	0.04	0.57	1.97	0	0	24.93
Time 20	23.09	0	0	0	0	0	1.045	0	0.036	0.04	0.16	2.14	0	0	25.03
Time 21	23.51	0	0	0	0	0	1.001	0	0.012	0.03	0.09	1.18	0	0	24.48
Time 22	23.67	0	0	0	0	0	0.971	0	0.005	0.04	0.18	0.72	0	0	24.12
Time 23	24.26	0	0	0	0	0	0.932	0	0.004	0.01	0.04	0.02	0.6	0	23.41
Time 24	24.35	0	0	0	0	0	0.902	0	0.013	0.1	0	0	1.03	0	23.17
10/02 2013	24.08	0	0	0	0	0	0.877	0	0.018	0.12	0	0	1.25	0	22.7
Time 02	24.18	0	0	0	0	0	0.872	0	0.006	0.12	0	0	1.68	0	22.38
Time 03	24.39	0	0	0	0	0	0.86	0	0.005	0.12	0	0	2.21	0	22.01
Time 04	24.4	0	0	0	0	0	0.883	0	0.006	0.11	0	0	2.3	0	21.93
Time 05	24.43	0	0	0	0	0	0.902	0	0.006	0.09	0	0	2.45	0	21.84
Time 06	24.4	0	0	0	0	0	0.929	0	0.001	0.01	0.04	0	2.3	0	21.86
Time 07	24.27	0	0	0	0	0	0.942	0	0.001	0.01	0.09	0	1.87	0	22.12
Time 08	23.96	0	0	0	0	0	0.949	0	0.005	0.04	0.23	0	0.89	0	22.71
Time 09	23.93	0	0	0	0	0	0.976	0	0.001	0.02	0.08	0	0.62	0	23.14
Time 10	24.21	0	0	0	0	0	0.991	0	0.002	0.01	0.1	0.41	0.02	0	24.33
Time 11	23.98	0	0	0	0	0	1.024	0	0.002	0.01	0.11	0.91	0	0	24.62
Time 12	24.02	0	0	0	0	0	1.051	0	0.006	0.01	0.34	0.6	0	0	24.16
Time 13	24.01	0	0	0	0	0	1.074	0	0.007	0.01	1.02	0.96	0.02	0	23.87
Time 14	24.24	0	0	0	0	0	1.117	0	0.006	0.02	0.52	0.12	0.31	0	23.49
Time 15	24.26	0	0	0	0	0	1.168	0	0.05	0.01	0.43	0.02	0.77	0	23.04
Time 16	24.2	0	0	0	0	0	1.202	0	0.029	0.02	0.43	0	0.96	0	22.85
Time 17	24.19	0	0	0	0	0	1.163	0	0.008	0.01	0.34	0	0.98	0	22.88
Time 18	24.48	0	0	0	0	0	1.106	0	0.002	0.02	0.39	0.05	0.82	0	23.26
Time 19	24.22	0	0	0	0	0	1.046	0	0.007	0.01	0.54	0.43	0.12	0	23.86
Time 20	23.6	0	0	0	0	0	1.022	0	0.005	0.01	0.5	1.1	0	0	24.13
Time 21	23.87	0	0	0	0	0	1.013	0	0.031	0.01	0.46	0.72	0	0	23.97
Time 22	24.34	0	0	0	0	0	0.989	0	0.017	0.03	0.61	0.22	0.31	0	23.47
Time 23	24.63	0	0	0	0	0	1.328	0	0.043	0.03	0.1	0	1.99	0	22.72
Time 24	24.75	0	0	0	0	0	1.349	0	0.036	0.03	0.2	0	2.98	0	21.74
11/02 2013	24.83	0	0	0	0	0	1.349	0	0.04	0.01	0.26	0	3.65	0	21.07
Time 02	24.94	0	0	0	0	0	1.321	0	0.012	0.03	0.15	0	4.46	0	20.45
Time 03	24.31	0	0	0	0	0	1.328	0	0.007	0.04	0.04	0	3.98	0	20.49
Time 04	24.12	0	0	0	0	0	1.316	0	0	0.02	0.24	0	3.62	0	20.48
Time 05	24.14	0	0	0	0	0	1.312	0	0.001	0	0.35	0	3.14	0	20.85
Time 06	23.94	0	0	0	0	0	1.307	0	0.001	0.01	0.44	0	2.23	0	21.44
Time 07	23.89	0	0	0	0	0	1.302	0	0.005	0.01	0.67	0.24	0.36	0	23.25
Time 08	24.67	0	0	0	0	0	1.303	0	0.001	0.05	0.54	2.3	0	0	26.46
Time 09	24.6	0	0	0	0	0	1.292	0	0.001	0.01	0.4	3.02	0	0	27.2
Time 10	25.12	0	0	0	0	0	1.292	0	0	0.02	0.41	2.47	0	0	27.11
Time 11	25.3	0	0	0	0	0	1.296	0	0.001	0.03	0.56	2.16	0	0	26.83
Time 12	25.24	0	0	0	0	0	1.302	0	0.001	0	0.58	1.85	0	0	26.45
Time 13	25.39	0	0	0	0	0	1.321	0	0.001	0.01	1.21	2.16	0	0	26.26
Time 14	25.4	0	0	0	0	0	1.332	0	0.002	0.01	0.77	1.37	0	0	25.99
Time 15	25.32	0	0	0	0	0	1.34	0	0.004	0	0.55	1.06	0	0	25.78
Time 16	25.43	0	0	0	0	0	1.34	0	0.007	0	0.61	0.36	0.05	0	25.1
Time 17	25.12	0	0	0	0	0	1.318	0	0.012	0	0.7	0.17	0.34	0	24.31
Time 18	23.96	0	0	0	0	0	1.319	0	0.005	0	0.72	1.1	0	0	24.45
Time 19	23.7	0	0	0	0	0	1.304	0	0.002	0	0.79	1.97	0	0	25.03
Time 20	23.59	0	0	0	0	0	1.272	0	0.004	0	1.42	2.78	0	0	25.05
Time 21	23.44	0	0	0	0	0	1.246	0	0.007	0.01	1.04	2.26	0	0	24.78
Time 22	23.79	0	0	0	0	0	1.222	0	0.005	0.02	1.12	1.58	0	0	24.34
Time 23	24.16	0	0	0	0	0	1.193	0	0.004	0	0.95	0.53	0.1	0	23.64
Time 24	24.32	0	0	0	0	0	1.176	0	0.006	0	0.56	0	1.08	0	22.74
12/02 2013	24.67	0	0	0	0	0	1.168	0	0.002	0.01	0.91	0	2.04	0	21.73
Time 02	24.79	0	0	0	0	0	1.166	0	0.005	0	0.64	0	2.83	0	21.28
Time 03	24.77	0	0	0	0	0	1.17	0	0	0	0.71	0	2.9	0	21.18
Time 04	24.72	0	0	0	0	0	1.187	0	0.005	0	1.45	0	2.11	0	21.18
Time 05	24.51	0	0	0	0	0	1.184	0	0.006	0	2.07	0.07	1.25	0	21.3
Time 06	24.1	0	0	0	0	0	1.183	0	0.004	0.01	1.06	0.05	1.27	0	21.91
Time 07	23.71	0	0	0	0	0	1.168	0	0.001	0.01	0.77	1.13	0.07	0	24.06
Time 08	23.06	0	0	0	0	0	1.16	0	0	0.03	0.69	4.73	0	0	27.12
Time 09	23	0	0	0	0	0	1.136	0	0	0.03	0.41	5.88	0	0	28.36
Time 10	23.05	0	0	0	0	0	1.124	0	0	0.04	0.33	5.9	0	0	28.46
Time 11	23.41	0	0	0	0	0	1.117	0	0.001	0.04	0.31	4.61	0	0	27.57
Time 12	23.56	0	0	0	0	0	1.116	0	0	0.02	0.29	3.41	0	0	26.53
Time 13	24.05	0	0	0	0	0	1.138	0	0	0.01	0.8	3.02	0	0	26.1
Time 14	24.22	0	0	0	0	0	0.469	0	0.004	0.03	0.47	2.14	0	0	25.19
Time 15	24.21	0	0	0	0	0	0.464	0	0.002	0.03	0.55	2.11	0	0	25.01
Time 16	24.06	0	0	0	0	0	0.466	0	0.004	0.02	0.43	1.78	0	0	24.72
Time 17	23.93	0	0	0	0	0	0.456	0	0.008	0.01	0.47	1.25	0	0	24.03
Time 18	23.54	0	0	0	0	0	0.464	0	0.006	0.01	0.49	1.75	0	0	24.14
Time 19	23.4	0	0	0	0	0	0.466	0	0.004	0	0.52	2.47	0	0	24.67
Time 20	23.43	0	0	0	0	0	0.446	0	0.006	0	1.46	3.38	0	0	24.64
Time 21	23.3	0	0	0	0	0	0.457	0	0.006	0	0.96	2.45	0	0	24.17
Time 22	24.02	0	0	0	0	0	0.582	0	0.006	0.01	0.89	1.13	0.02	0	23.64
Time 23	24.19	0	0	0	0	0	0.788	0	0.002	0	0.79	0.17	0.43	0	22.78
Time 24	24.24	0	0	0	0	0	0.786	0	0.002	0	0.62	0	1.46	0	21.82
13/02 2013	24.86	0	0	0	0	0	0.779	0	0.001	0	0.81	0	2.78	0	20.83
Time 02	24.99	0	0	0	0	0	0.776	0	0.002	0	0.94	0	3.17	0	20.45
Time 03	24.82	0	0	0	0	0	0.767	0	0.002	0	0.96	0	3.07	0	20.39
Time 04	24.85	0	0	0	0	0	0.772	0	0.004	0	1.66	0	2.62	0	20.2
Time 05	24.71	0	0	0	0	0	0.766	0	0.004	0	1.4	0	2.47	0	20.42
Time 06	24.42	0	0	0	0	0	0.762	0	0.002	0.01	0.75	0	2.26	0	21.08
Time 07	23.93	0	0	0	0	0	0.755	0	0.001	0.01	0.68	0.48	0.41	0	22.92
Time 08	23.33	0	0	0	0	0	0.758	0	0	0.01	0.42	3.14	0	0	25.61
Time 09	23.2	0	0	0	0	0	0.745	0	0	0.04	0.55	5.11	0	0	27.31
Time 10	23.6	0	0	0	0	0	0.752	0	0	0.05	0.38	4.22	0	0	26.99
Time 11	23.86	0	0	0	0	0	0.76	0	0	0.08	0.39	3.65	0	0	26.67
Time 12	23.96	0	0	0	0	0	0.75	0	0	0.08	0.82	3.43	0	0	26.14
Time 13	24.34	0	0	0	0	0	0.75	0	0	0.02	0.98	2.66	0	0	25.54
Time 14	24.35	0	0	0	0	0	0.271	0.012	0.001	0.01	0.39	1.97	0	0	24.92
Time 15	24.42	0	0	0	0	0	0	0.017	0	0.01	0.31	2.09	0	0	24.99
Time 16	24.27	0	0	0	0	0	0	0.018	0	0.02	0.36	2.04	0	0	24.76
Time 17	24.24	0	0	0	0	0	0	0.017	0	0.02	0.43	1.63	0	0	24.26
Time 18	23.72	0	0	0	0	0	0	0.017	0	0.01	0.43	2.59	0	0	24.75
Time 19	23.16	0	0	0	0	0	0	0.018	0	0.02	0.54	3.12	0	0	24.65
Time 20	23.44	0	0	0	0	0	0	0.017	0	0	1.55	4.01	0	0	24.78
Time 21	23.7	0	0	0	0	0	0	0.017	0	0	1.05	2.9	0	0	24.4
Time 22	23.76	0	0	0	0	0	0	0.018	0	0.01	1.08	2.18	0	0	23.73
Time 23	24.34	0	0	0	0	0	0	0.018	0	0	0.92	0.36	0.22	0	22.44
Time 24	24.26	0	0	0	0	0	0	0.017	0	0	0.54	0	1.46	0	21.15
14/02 2013	24.61	0	0	0	0	0	0	0.018	0	0	0.69	0	2.52	0	20.3
Time 02	24.69	0	0	0	0	0	0	0.018	0	0	0.93	0	2.88	0	19.79
Time 03	24.64	0	0	0	0	0	0	0.017	0	0	0.99	0	3	0	19.51
Time 04	24.66	0	0	0	0	0	0	0.018	0	0.02	1.97	0.02	1.99	0	19.62
Time 05	24.69	0	0	0	0	0	0	0.018	0	0	1.47	0	2.18	0	19.95
Time 06	24.44	0	0	0	0	0	0	0.017	0	0.01	0.79	0	1.97	0	20.58
Time 07	24.18	0	0	0	0	0	0	0.018	0	0.01	0.71	0.67	0.46	0	22.61
Time 08	23.01	0	0	0	0	0	0	0.017	0	0.02	0.43	4.54	0	0	25.94
Time 09	23.42	0	0	0	0	0	0	0.017	0	0.02	0.22	4.78	0	0	26.8
Time 10	23.31	0	0	0	0	0	0	0.018	0	0.04	0.22	4.78	0	0	26.71
Time 11	23.26	0	0	0	0	0	0	0.017	0	0.04	0.31	4.82	0	0	26.57
Time 12	23.3	0	0	0	0	0	0	0.017	0	0.04	0.64	5.04	0	0	26.51
Time 13	23.34	0	0	0	0	0	0	0.018	0	0.02	0.73	5.18	0	0	26.6
Time 14	23.01	0	0	0	0	0	0	0.017	0	0.01	0.37	4.78	0	0	26.23
Time 15	23.21	0	0	0	0	0	0	0.017	0	0.01	0.28	4.01	0	0	25.8
Time 16	23.21	0	0	0	0	0	0	0.017	0	0.02	0.36	3.34	0	0	25.07
Time 17	23.36	0	0	0	0	0	0	0.018	0	0.01	0.43	3.19	0	0	25.01
Time 18	23.35	0	0	0	0	0	0	0.017	0	0.01	0.44	3.31	0	0	25.08
Time 19	22.64	0	0	0	0	0	0	0.017	0	0.01	0.57	3.7	0	0	24.7
Time 20	22.82	0	0	0	0	0	0	0.017	0	0	1.59	4.25	0	0	24.41
Time 21	23.2	0	0	0	0	0	0	0.018	0	0	1.23	2.76	0	0	23.66
Time 22	23.45	0	0	0	0	0	0	0.017	0	0	1.54	2.23	0	0	23.07
Time 23	23.73	0	0	0	0	0	0	0.017	0	0	0.68	0.31	0.12	0	22.18
Time 24	23.88	0	0	0	0	0	0	0.018	0	0	0.44	0.02	0.62	0	21.76
15/02 2013	24.19	0	0	0	0	0	0	0.018	0	0	0.93	0	1.75	0	20.43
Time 02	24.3	0	0	0	0	0	0	0.017	0	0	0.73	0	2.74	0	19.76
Time 03	24.36	0	0	0	0	0	0	0.017	0	0	1.01	0.02	2.78	0	19.49
Time 04	24.51	0	0	0	0	0	0	0.018	0	0.01	1.79	0	2.16	0	19.45
Time 05	24.39	0	0	0	0	0	0	0.017	0	0	1.53	0	2.18	0	19.6
Time 06	24.17	0	0	0	0	0	0	0.018	0	0.01	0.75	0.02	1.97	0	20.37
Time 07	23.51	0	0	0	0	0	0	0.018	0	0.01	0.74	0.46	0.29	0	21.92
Time 08	22.59	0	0	0	0	0	0	0.017	0	0.01	0.48	4.2	0	0	25.22
Time 09	22.88	0	0	0	0	0	0	0.017	0	0.03	0.37	4.39	0	0	25.77
Time 10	23.41	0	0	0	0	0	0	0.017	0	0.07	0.36	3.77	0	0	25.68
Time 11	23.67	0	0	0	0	0	0	0.017	0	0.05	0.38	3.34	0	0	25.49
Time 12	23.6	0	0	0	0	0	0	0.017	0	0.03	0.58	3.17	0	0	25.07
Time 13	23.63	0	0	0	0	0	0	0.018	0	0.01	0.8	3.12	0	0	24.77
Time 14	23.55	0	0	0	0	0	0	0.017	0	0.01	0.4	2.74	0	0	24.71
Time 15	23.72	0	0	0	0	0	0	0.017	0	0.02	0.26	2.02	0	0	24.36
Time 16	23.85	0	0	0	0	0	0	0.018	0	0.03	0.33	1.03	0	0	23.42
Time 17	23.74	0	0	0	0	0	0	0.017	0	0.02	0.45	0.98	0	0	23.17
Time 18	23.78	0	0	0	0	0	0	0.017	0	0.02	0.46	0.96	0	0	23.18
Time 19	23.29	0	0	0	0	0	0	0.018	0	0.02	0.39	1.92	0	0	23.75
Time 20	23.04	0	0	0	0	0	0	0.017	0	0	0.92	2.42	0	0	23.45
Time 21	23.32	0	0	0	0	0	0	0.018	0	0.01	0.98	1.51	0	0	22.75
Time 22	23.75	0	0	0	0	0	0	0.017	0	0.01	0.88	0.41	0.24	0	21.98
Time 23	24.06	0	0	0	0	0	0	0.018	0	0	0.4	0	1.58	0	20.94
Time 24	24	0	0	0	0	0	0	0.018	0	0.03	0.46	0	2.26	0	20.2
16/02 2013	24.44	0	0	0	0	0	0	0.017	0	0.08	0.27	0	3.72	0	19.44
Time 02	24.7	0	0	0	0	0	0	0.018	0	0.03	0.49	0	4.39	0	18.67
Time 03	24.78	0	0	0	0	0	0	0.017	0	0.01	0.2	0	4.75	0	18.68
Time 04	24.62	0	0	0	0	0	0	0.018	0	0	0.69	0	4.44	0	18.36
Time 05	24.5	0	0	0	0	0	0	0.017	0	0.03	0.52	0	4.56	0	18.34
Time 06	24.52	0	0	0	0	0	0	0.018	0	0.06	0.47	0	4.42	0	18.5
Time 07	24.5	0	0	0	0	0	0	0.017	0	0.04	0.29	0	4.22	0	18.9
Time 08	24.24	0	0	0	0	0	0	0.018	0	0.01	0.34	0	2.69	0	20.12
Time 09	23.96	0	0	0	0	0	0	0.017	0	0.04	0.26	0.02	1.66	0	20.96
Time 10	24.04	0	0	0	0	0	0	0.017	0	0.06	0.39	0.02	0.74	0	21.88
Time 11	23.99	0	0	0	0	0	0	0.018	0	0.03	0.11	0.07	0.19	0	22.66
Time 12	24.03	0	0	0	0	0	0	0.017	0	0.04	0.14	0.02	0.34	0	22.47
Time 13	24.17	0	0	0	0	0	0	0.017	0	0.05	0.34	0.05	0.55	0	22.18
Time 14	24.24	0	0	0	0	0	0	0.018	0	0.04	0.48	0.02	0.89	0	21.82
Time 15	24.23	0	0	0	0	0	0	0.017	0	0.02	0.4	0	1.08	0	21.61
Time 16	24.07	0	0	0	0	0	0	0.018	0	0.02	0.14	0	1.51	0	21.31
Time 17	23.97	0	0	0	0	0	0	0.017	0	0.03	0.24	0	1.49	0	21.15
Time 18	23.66	0	0	0	0	0	0	0.017	0	0.03	0.64	0.14	0.38	0	21.74
Time 19	23.34	0	0	0	0	0	0	0.018	0	0.03	0.52	0.46	0.12	0	22.11
Time 20	23.47	0	0	0	0	0	0	0.017	0	0.03	0.12	0.02	0.41	0	21.91
Time 21	23.9	0	0	0	0	0	0	0.017	0	0.05	0.08	0	1.37	0	21.38
Time 22	24.11	0	0	0	0	0	0	0.018	0	0.05	0.21	0	2.04	0	20.77
Time 23	24.45	0	0	0	0	0	0	0.017	0	0.04	0.02	0	3.17	0	20.15
Time 24	24.63	0	0	0	0	0	0	0.018	0	0	0.09	0	4.01	0	19.38
17/02 2013	24.5	0	0	0	0	0	0	0.017	0	0	0.1	0	4.49	0	18.81
Time 02	24.46	0	0	0	0	0	0	0.018	0	0	0.07	0	4.82	0	18.41
Time 03	24.58	0	0	0	0	0	0	0.017	0	0	0.06	0	5.09	0	18.28
Time 04	24.83	0	0	0	0	0	0	0.017	0	0	0.06	0	5.33	0	18.26
Time 05	24.86	0	0	0	0	0	0	0.018	0	0	0.06	0	5.35	0	18.29
Time 06	24.87	0	0	0	0	0	0	0.017	0	0.02	0.02	0	5.47	0	18.21
Time 07	24.55	0	0	0	0	0	0	0.018	0	0.04	0.05	0	4.87	0	18.5
Time 08	24.23	0	0	0	0	0	0	0.017	0	0.04	0.18	0	4.06	0	18.91
Time 09	24.45	0	0	0	0	0	0	0.017	0	0.04	0.05	0	3.98	0	19.34
Time 10	24.54	0	0	0	0	0	0	0.018	0	0.01	0.06	0	3.14	0	20.19
Time 11	24.25	0	0	0	0	0	0	0.017	0	0.01	0.1	0	2.09	0	20.93
Time 12	24.39	0	0	0	0	0	0	0.017	0	0.01	0.42	0	1.7	0	21.12
Time 13	24.29	0	0	0	0	0	0	0.018	0	0.01	0.8	0	1.15	0	21.26
Time 14	24.5	0	0	0	0	0	0	0.017	0	0.01	0.44	0	1.73	0	21.17
Time 15	24.32	0	0	0	0	0	0	0.017	0	0.01	0.38	0	1.99	0	20.83
Time 16	24.4	0	0	0	0	0	0	0.018	0	0.03	0.3	0	2.45	0	20.53
Time 17	24.41	0	0	0	0	0	0	0.017	0	0.02	0.35	0	2.45	0	20.49
Time 18	24.86	0	0	0	0	0	0	0.017	0	0.01	0.38	0	2.71	0	20.55
Time 19	24.48	0	0	0	0	0	0	0.017	0	0.01	0.37	0	1.99	0	20.98
Time 20	24.33	0	0	0	0	0	0	0.018	0	0.02	0.43	0	1.7	0	21.06
Time 21	24.45	0	0	0	0	0	0	0.017	0	0.02	0.43	0	1.94	0	20.95
Time 22	24.27	0	0	0	0	0	0	0.017	0	0.04	0.56	0	2.16	0	20.44
Time 23	24.3	0	0	0	0	0	0	0.017	0	0.03	0.11	0	3.31	0	19.77
Time 24	24.59	0	0	0	0	0	0	0.018	0	0.03	0.21	0	4.22	0	19.03
18/02 2013	24.87	0	0	0	0	0	0	0.017	0	0.03	0.25	0	5.26	0	18.2
Time 02	25.11	0	0	0	0	0	0	0.018	0	0.02	0.29	0	5.93	0	17.67
Time 03	25.06	0	0	0	0	0	0	0.017	0	0	0.53	0	5.62	0	17.7
Time 04	25.12	0	0	0	0	0	0	0.018	0	0	0.5	0	5.66	0	17.72
Time 05	25.16	0	0	0	0	0	0	0.017	0	0.01	0.17	0	5.83	0	17.92
Time 06	25.02	0	0	0	0	0	0	0.017	0	0.01	0.35	0	5.09	0	18.41
Time 07	24.36	0	0	0	0	0	0	0.018	0	0.02	0.6	0	2.42	0	20.22
Time 08	24.14	0	0	0	0	0	0	0.017	0	0.03	0.36	0.19	0.24	0	22.56
Time 09	24.33	0	0	0	0	0	0	0.017	0	0.01	0.28	0.02	5.47	0	17.45
Time 10	24.43	0	0	0	0	0	0	0.017	0	0.02	0.38	0	6.58	0	16.3
Time 11	24.68	0	0	0	0	0	0	0.018	0	0.02	0.4	0	6.98	0	16.1
Time 12	24.95	0	0	0	0	0	0	0.017	0	0.01	0.38	0	7.78	0	15.56
Time 13	25.04	0	0	0	0	0	0	0.018	0	0.01	0.74	0	7.63	0	15.4
Time 14	25.1	0	0	0	0	0	0	0.017	0	0.01	0.46	0	7.99	0	15.41
Time 15	25.04	0	0	0	0	0	0	0.018	0	0	0.36	0	8.18	0	15.21
Time 16	24.95	0	0	0	0	0	0	0.017	0	0.01	0.44	0	8.3	0	14.94
Time 17	24.75	0	0	0	0	0	0	0.018	0	0.01	0.54	0	8.64	0	14.35
Time 18	24.79	0	0	0	0	0	0	0.017	0	0.01	0.63	0	8.47	0	14.46
Time 19	24.61	0	0	0	0	0	0	0.017	0	0.01	0.73	0	8.11	0	14.54
Time 20	22.62	0.62	0	0	0	0	0	0.018	0	0	1.42	0	4.94	0	14.68
Time 21	20.47	1.3	0	0	0	0	0	0.017	0	0	1	0	3.05	0	14.47
Time 22	20.52	1.15	0	0	0	0	0	0.018	0	0.01	1.11	0	3.5	0	13.99
Time 23	21.71	0.78	0	0	0	0	0	0.018	0	0	0.94	0	5.78	0	13.33
Time 24	25.48	0	0	0	0	0	0	0.017	0	0	0.72	0	10.7	0	12.66
19/02 2013	25.15	0	0	0	0	0	0	0.018	0	0	0.75	0	11.09	0	11.97
Time 02	25.41	0	0	0	0	0	0	0.017	0	0	0.95	0	11.47	0	11.6
Time 03	25.53	0	0	0	0	0	0	0.018	0	0	0.83	0	11.78	0	11.54
Time 04	25.77	0	0	0	0	0	0	0.018	0	0	1.36	0	11.54	0	11.44
Time 05	25.69	0	0	0	0	0	0	0.017	0	0	1.94	0	10.7	0	11.67
Time 06	25.49	0	0	0	0	0	0	0.018	0	0	1.45	0	10.51	0	12.18
Time 07	25.06	0	0	0	0	0	0	0.017	0	0	1.14	0	9.36	0	13.31
Time 08	24.61	0	0	0	0	0	0	0.018	0	0	0.88	0	7.75	0	14.78
Time 09	24.94	0	0	0	0	0	0	0.017	0	0	0.58	0	7.7	0	15.46
Time 10	24.96	0	0	0	0	0	0	0.018	0	0	0.7	0	7.56	0	15.47
Time 11	25.03	0	0	0	0	0	0	0.017	0	0.01	0.79	0	7.49	0	15.54
Time 12	25.04	0	0	0	0	0	0	0.018	0	0.01	0.86	0	7.75	0	15.16
Time 13	25.22	0	0	0	0	0	0	0.017	0	0.01	1.12	0	7.97	0	14.91
Time 14	25.22	0	0	0	0	0	0	0.018	0	0	0.75	0	8.64	0	14.55
Time 15	25.25	0	0	0	0	0	0	0.017	0	0	0.65	0	9.34	0	13.98
Time 16	25.57	0	0	0	0	0	0	0.017	0	0	0.72	0	9.86	0	13.66
Time 17	25.3	0	0	0	0	0	0	0.018	0	0	0.8	0	9.77	0	13.44
Time 18	25.16	0	0	0	0	0	0	0.017	0	0	0.8	0	9.38	0	13.71
Time 19	24.71	0	0	0	0	0	0	0.018	0	0	0.91	0	7.92	0	14.67
Time 20	24.33	0	0	0	0	0	0	0.018	0	0	1.67	0	6.58	0	15
Time 21	24.51	0	0	0	0	0	0	0.017	0	0	1.21	0	7.44	0	14.7
Time 22	24.69	0	0	0	0	0	0	0.018	0	0	1.22	0	7.8	0	14.49
Time 23	24.76	0	0	0	0	0	0	0.018	0	0	1.05	0	8.4	0	14.09
Time 24	24.83	0	0	0	0	0	0	0.017	0	0	0.76	0	9.38	0	13.47
20/02 2013	25.13	0	0	0	0	0	0	0.018	0	0	0.78	0	10.1	0	12.97
Time 02	24.99	0	0	0	0	0	0	0.018	0	0	1.36	0	9.65	0	12.71
Time 03	24.95	0	0	0	0	0	0	0.018	0	0.02	1.05	0	10.06	0	12.62
Time 04	24.91	0	0	0	0	0	0	0.018	0	0.01	1.48	0	9.55	0	12.68
Time 05	24.76	0	0	0	0	0	0	0.017	0	0	1.26	0	9.43	0	12.88
Time 06	24.56	0	0	0	0	0	0	0.018	0	0	1.25	0	8.66	0	13.47
Time 07	24.41	0	0	0	0	0	0	0.018	0	0	1.15	0	7.01	0	15.14
Time 08	23.73	0	0	0	0	0	0	0.017	0	0	0.86	0	5.23	0	16.63
Time 09	24.13	0	0	0	0	0	0	0.018	0	0.01	0.57	0	5.02	0	17.46
Time 10	23.92	0	0	0	0	0	0	0.004	0	0.04	0.58	0	4.85	0	17.48
Time 11	23.29	0	0	0	0	0	0	0	0	0.04	0.62	0	4.56	0	17.13
Time 12	23.47	0	0	0	0	0	0	0	0	0.02	0.81	0	5.26	0	16.42
Time 13	23.77	0	0	0	0	0	0	0	0	0.01	1.42	0	5.4	0	15.88
Time 14	24.22	0	0	0	0	0	0	0	0	0	1.09	0	6.67	0	15.35
Time 15	24.55	0	0	0	0	0	0	0	0	0	0.71	0	7.63	0	15.02
Time 16	24.5	0	0	0	0	0	0	0.008	0	0	0.73	0	7.56	0	15.06
Time 17	24.34	0	0	0	0	0	0	0.024	0	0	0.74	0	7.87	0	14.54
Time 18	24.51	0	0	0	0	0	0	0.025	0	0	0.75	0	7.73	0	14.87
Time 19	23.33	0	0	0	0	0	0	0.023	0	0	0.76	0	5.78	0	15.75
Time 20	23.37	0	0	0	0	0	0	0.025	0	0	1.19	0	4.9	0	16.27
Time 21	23.42	0	0	0	0	0	0	0.024	0	0	1.36	0	4.9	0	16.18
Time 22	23.65	0	0	0	0	0	0	0.024	0	0	1.59	0	5.16	0	15.87
Time 23	23.86	0	0	0	0	0	0	0.024	0	0	0.6	0	6.89	0	15.29
Time 24	23.81	0	0	0	0	0	0	0.024	0	0	0.62	0	7.66	0	14.47
21/02 2013	23.96	0	0	0	0	0	0	0.024	0	0	1.8	0	7.18	0	13.91
Time 02	24.05	0	0	0	0	0	0	0.024	0	0	1.63	0	7.63	0	13.71
Time 03	24.19	0	0	0	0	0	0	0.024	0	0	1.4	0	8.06	0	13.62
Time 04	24.12	0	0	0	0	0	0	0.024	0	0	2.19	0	7.06	0	13.82
Time 05	24.1	0	0	0	0	0	0	0.024	0	0	1.5	0	7.44	0	14.07
Time 06	23.84	0	0	0	0	0	0	0.024	0	0	1.11	0	7.2	0	14.48
Time 07	23.48	0	0	0	0	0	0	0.024	0	0	1.08	0	5.66	0	15.74
Time 08	22.91	0	0	0	0	0	0	0.024	0	0	0.77	0	3.46	0	17.75
Time 09	22.82	0	0	0	0	0	0	0.024	0	0.02	0.55	0	3	0	18.32
Time 10	23.12	0	0	0	0	0	0	0.023	0	0.05	0.6	0	3.19	0	18.38
Time 11	23.42	0	0	0	0	0	0	0.024	0	0.09	0.88	0.02	3.46	0	18.16
Time 12	23.4	0	0	0	0	0	0	0.024	0	0.01	1.06	0	3.74	0	17.55
Time 13	23.65	0	0	0	0	0	0	0.024	0	0	1.54	0	4.15	0	16.9
Time 14	23.91	0	0	0	0	0	0	0.023	0	0	0.76	0	5.62	0	16.45
Time 15	24.15	0	0	0	0	0	0	0.024	0	0	0.62	0	5.9	0	16.48
Time 16	24.16	0	0	0	0	0	0	0.024	0	0	0.7	0	6.48	0	15.85
Time 17	24.08	0	0	0	0	0	0	0.024	0	0	0.8	0	6.62	0	15.51
Time 18	23.8	0	0	0	0	0	0	0.023	0	0	0.81	0	5.88	0	16.04
Time 19	23.51	0	0	0	0	0	0	0.024	0	0	0.86	0	5.28	0	16.34
Time 20	23.23	0	0	0	0	0	0	0.024	0	0	1.6	0	4.25	0	16.4
Time 21	23.32	0	0	0	0	0	0	0.024	0	0	1.2	0	4.99	0	16.13
Time 22	23.43	0	0	0	0	0	0	0.023	0	0.01	1.19	0	5.42	0	15.81
Time 23	23.77	0	0	0	0	0	0	0.024	0	0	0.98	0	6.38	0	15.38
Time 24	23.97	0	0	0	0	0	0	0.024	0	0	0.64	0	7.46	0	14.78
22/02 2013	24.19	0	0	0	0	0	0	0.024	0	0	1.12	0	7.61	0	14.39
Time 02	24.36	0	0	0	0	0	0	0.024	0	0	1.65	0	7.42	0	14.2
Time 03	24.19	0	0	0	0	0	0	0.024	0	0	1.95	0	6.89	0	14.28
Time 04	24.2	0	0	0	0	0	0	0.024	0	0	1.83	0	6.84	0	14.47
Time 05	23.96	0	0	0	0	0	0	0.024	0	0	1.27	0	7.01	0	14.65
Time 06	23.65	0	0	0	0	0	0	0.024	0	0	1.05	0	6.55	0	14.99
Time 07	23.25	0	0	0	0	0	0	0.024	0	0	1.11	0	4.73	0	16.47
Time 08	22.71	0	0	0	0	0	0	0.024	0	0	0.8	0	2.98	0	18.01
Time 09	22.97	0	0	0	0	0	0	0.024	0	0.02	0.56	0	2.74	0	18.72
Time 10	23.13	0	0	0	0	0	0	0.023	0	0.01	0.74	0	2.5	0	18.9
Time 11	23.21	0	0	0	0	0	0	0.024	0	0.05	0.81	0	2.88	0	18.55
Time 12	23.13	0	0	0	0	0	0	0.024	0	0	1.03	0	3.31	0	17.78
Time 13	23.26	0	0	0	0	0	0	0.023	0	0	1.53	0	3.6	0	17.1
Time 14	23.72	0	0	0	0	0	0	0.024	0	0	0.74	0	5.42	0	16.42
Time 15	23.88	0	0	0	0	0	0	0.024	0	0	0.62	0	6.29	0	15.86
Time 16	23.82	0	0	0	0	0	0	0.024	0	0	0.69	0	6.89	0	15.12
Time 17	23.59	0	0	0	0	0	0	0.024	0	0	0.76	0	6.98	0	14.75
Time 18	23.82	0	0	0	0	0	0	0.024	0	0	0.8	0	7.06	0	14.86
Time 19	23.38	0	0	0	0	0	0	0.024	0	0	0.75	0	5.93	0	15.63
Time 20	23.08	0	0	0	0	0	0	0.023	0	0	0.84	0	5.38	0	15.87
Time 21	23.15	0	0	0	0	0	0	0.024	0	0	0.85	0	5.66	0	15.64
Time 22	23.27	0	0	0	0	0	0	0.024	0	0	0.77	0	6.05	0	15.4
Time 23	23.68	0	0	0	0	0	0	0.024	0	0	0.48	0	7.15	0	14.96
Time 24	23.99	0	0	0	0	0	0	0.024	0	0	0.52	0	7.85	0	14.48
23/02 2013	24.45	0	0	0	0	0	0	0.024	0	0	0.6	0	8.59	0	14.07
Time 02	24.41	0	0	0	0	0	0	0.024	0	0.01	0.75	0	8.78	0	13.7
Time 03	24.59	0	0	0	0	0	0	0.023	0	0	0.59	0	9.22	0	13.53
Time 04	24.69	0	0	0	0	0	0	0.024	0	0	1.04	0	9.05	0	13.39
Time 05	24.61	0	0	0	0	0	0	0.024	0	0	0.55	0	9.5	0	13.31
Time 06	24.44	0	0	0	0	0	0	0.024	0	0	0.67	0	9.19	0	13.37
Time 07	24.11	0	0	0	0	0	0	0.024	0	0	0.65	0	8.66	0	13.62
Time 08	23.9	0	0	0	0	0	0	0.024	0	0	0.61	0	7.99	0	14.17
Time 09	23.77	0	0	0	0	0	0	0.023	0	0.01	0.59	0	7.18	0	14.92
Time 10	23.75	0	0	0	0	0	0	0.024	0	0.03	0.71	0	6.36	0	15.61
Time 11	23.23	0	0	0	0	0	0	0.024	0	0	0.47	0	5.81	0	15.92
Time 12	23.08	0	0	0	0	0	0	0.023	0	0	0.51	0	6	0	15.53
Time 13	23.2	0	0	0	0	0	0	0.024	0	0	0.9	0	5.93	0	15.32
Time 14	23.01	0	0	0	0	0	0	0.024	0	0.01	0.76	0	6.34	0	14.9
Time 15	23.46	0	0	0	0	0	0	0.023	0	0	0.52	0	7.3	0	14.53
Time 16	23.49	0	0	0	0	0	0	0.024	0	0	0.58	0	7.54	0	14.31
Time 17	23.24	0	0	0	0	0	0	0.024	0	0	0.66	0	7.27	0	14.28
Time 18	23.29	0	0	0	0	0	0	0.023	0	0	1.06	0	6.6	0	14.54
Time 19	23.04	0	0	0	0	0	0	0.024	0	0	0.79	0	5.93	0	15.28
Time 20	22.45	0	0	0	0	0	0	0.024	0	0	0.45	0	5.86	0	15.18
Time 21	22.36	0	0	0	0	0	0	0.023	0	0	0.41	0	6.36	0	14.62
Time 22	22.96	0	0	0	0	0	0	0.024	0	0	0.51	0	7.13	0	14.28
Time 23	23.17	0	0	0	0	0	0	0.024	0	0	0.35	0	7.94	0	13.82
Time 24	23.15	0	0	0	0	0	0	0.024	0	0	0.33	0	8.38	0	13.35
24/02 2013	23.71	0	0	0	0	0	0	0.023	0	0	0.34	0	9.43	0	12.79
Time 02	23.87	0	0	0	0	0	0	0.024	0	0	0.34	0	9.67	0	12.67
Time 03	23.88	0	0	0	0	0	0	0.024	0	0	0.33	0	9.62	0	12.74
Time 04	23.59	0	0	0	0	0	0	0.024	0	0	0.35	0	9.48	0	12.62
Time 05	23.56	0	0	0	0	0	0	0.024	0	0	0.36	0	9.29	0	12.78
Time 06	23.68	0	0	0	0	0	0	0.024	0	0	0.35	0	9.17	0	13.02
Time 07	23.35	0	0	0	0	0	0	0.024	0	0	0.39	0	8.47	0	13.42
Time 08	23.24	0	0	0	0	0	0	0.023	0	0	0.47	0	8.11	0	13.64
Time 09	23.17	0	0	0	0	0	0	0.024	0	0	0.4	0	7.44	0	14.28
Time 10	22.87	0	0	0	0	0	0	0.024	0	0	0.41	0	6.91	0	14.53
Time 11	22.98	0	0	0	0	0	0	0.023	0	0	0.53	0	6.89	0	14.53
Time 12	23.64	0	0	0	0	0	0	0.024	0	0	0.92	0	7.7	0	13.89
Time 13	23.76	0	0	0	0	0	0	0.024	0	0	1.08	0	8.18	0	13.37
Time 14	23.87	0	0	0	0	0	0	0.024	0	0	0.68	0	8.59	0	13.43
Time 15	24.08	0	0	0	0	0	0	0.024	0	0	0.68	0	9.19	0	13
Time 16	24.38	0	0	0	0	0	0	0.024	0	0.01	0.68	0	9.65	0	12.84
Time 17	24.01	0	0	0	0	0	0	0.024	0	0	0.72	0	9.41	0	12.69
Time 18	24.12	0	0	0	0	0	0	0.023	0	0	0.77	0	9.29	0	12.86
Time 19	23.65	0	0	0	0	0	0	0.024	0	0	0.76	0	7.82	0	13.94
Time 20	23.53	0	0	0	0	0	0	0.024	0	0	0.82	0	7.13	0	14.49
Time 21	23.57	0	0	0	0	0	0	0.024	0	0	0.86	0	7.34	0	14.25
Time 22	23.51	0	0	0	0	0	0	0.023	0	0	0.94	0	7.46	0	14.07
Time 23	23.73	0	0	0	0	0	0	0.024	0	0	0.52	0	8.66	0	13.4
Time 24	23.79	0	0	0	0	0	0	0.024	0	0	0.58	0	9.31	0	12.77
25/02 2013	23.77	0	0	0	0	0	0	0.024	0	0	0.6	0	9.7	0	12.31
Time 02	24.37	0	0	0	0	0	0	0.023	0	0	0.52	0	10.49	0	12.15
Time 03	24.31	0	0	0	0	0	0	0.024	0	0	0.6	0	10.27	0	12.19
Time 04	24.3	0	0	0	0	0	0	0.024	0	0	0.72	0	10.3	0	12.1
Time 05	24.1	0	0	0	0	0	0	0.023	0	0	0.59	0	10.1	0	12.22
Time 06	23.7	0	0	0	0	0	0	0.024	0	0	0.71	0	9.14	0	12.72
Time 07	23.82	0	0	0	0	0	0	0.023	0	0	0.99	0	7.54	0	14.2
Time 08	23.56	0	0	0	0	0	0	0.024	0	0.01	0.78	0	5.47	0	16.28
Time 09	23.47	0	0	0	0	0	0	0.023	0	0	0.57	0	5.23	0	16.63
Time 10	23.28	0	0	0	0	0	0	0.024	0	0	0.61	0	5.33	0	16.26
Time 11	23.61	0	0	0	0	0	0	0.023	0	0.03	0.55	0	6.17	0	15.84
Time 12	24.21	0	0	0	0	0	0	0.024	0	0.01	0.56	0	7.46	0	15
Time 13	24.35	0	0	0	0	0	0	0.023	0	0	1	0	7.75	0	14.42
Time 14	24.45	0	0	0	0	0	0	0.024	0	0	0.7	0	8.66	0	13.85
Time 15	24.67	0	0	0	0	0	0	0.024	0	0	0.6	0	9	0	13.84
Time 16	24.62	0	0	0	0	0	0	0.023	0	0	0.66	0	9.48	0	13.2
Time 17	24.52	0	0	0	0	0	0	0.024	0	0	0.74	0	9.82	0	12.72
Time 18	24.51	0	0	0	0	0	0	0.024	0	0	0.81	0	9.53	0	12.96
Time 19	24.12	0	0	0	0	0	0	0.023	0	0	0.87	0	8.18	0	13.89
Time 20	24.16	0	0	0	0	0	0	0.024	0	0	1.58	0	7.06	0	14.4
Time 21	24.21	0	0	0	0	0	0	0.023	0	0	1.14	0	7.54	0	14.42
Time 22	24.16	0	0	0	0	0	0	0.024	0	0	1.2	0	7.73	0	14.14
Time 23	24.14	0	0	0	0	0	0	0.023	0	0	1.04	0	8.45	0	13.52
Time 24	24.38	0	0	0	0	0	0	0.024	0	0	0.72	0	9.48	0	13
26/02 2013	24.38	0	0	0	0	0	0	0.024	0	0	1.63	0	9.12	0	12.46
Time 02	24.53	0	0	0	0	0	0	0.024	0	0	1.26	0	9.82	0	12.28
Time 03	24.6	0	0	0	0	0	0	0.024	0	0	1.64	0	9.48	0	12.26
Time 04	24.72	0	0	0	0	0	0	0.023	0	0.03	1.59	0	9.62	0	12.33
Time 05	24.43	0	0	0	0	0	0	0.024	0	0	1.52	0	9.07	0	12.69
Time 06	24.19	0	0	0	0	0	0	0.024	0	0	0.83	0	8.42	0	13.82
Time 07	23.66	0	0	0	0	0	0	0.024	0	0.01	0.83	0	6.84	0	14.95
Time 08	23.16	0	0	0	0	0	0	0.023	0	0.03	0.6	0	4.87	0	16.75
Time 09	23.16	0	0	0	0	0	0	0.024	0	0.04	0.36	0	4.51	0	17.34
Time 10	22.9	0	0	0	0	0	0	0.023	0	0.04	0.38	0	3.98	0	17.55
Time 11	23.27	0	0	0	0	0	0	0.024	0	0.03	0.4	0	4.87	0	16.94
Time 12	23.5	0	0	0	0	0	0	0.024	0	0.04	0.66	0	5.54	0	16.23
Time 13	24.09	0	0	0	0	0	0	0.024	0	0.01	0.76	0	6.74	0	15.42
Time 14	24.2	0	0	0	0	0	0	0.024	0	0.01	0.4	0	7.61	0	14.94
Time 15	24.5	0	0	0	0	0	0	0.024	0	0.01	0.32	0	8.09	0	14.83
Time 16	24.54	0	0	0	0	0	0	0.024	0	0.01	0.39	0	8.5	0	14.36
Time 17	24.37	0	0	0	0	0	0	0.023	0	0.01	0.45	0	8.78	0	13.91
Time 18	23.97	0	0	0	0	0	0	0.024	0	0.02	0.51	0	8.59	0	13.69
Time 19	23.91	0	0	0	0	0	0	0.024	0	0.01	0.56	0	7.75	0	14.49
Time 20	23.69	0	0	0	0	0	0	0.024	0	0	1.59	0	6.07	0	14.95
Time 21	23.64	0	0	0	0	0	0	0.023	0	0	1.18	0	6.41	0	14.96
Time 22	23.77	0	0	0	0	0	0	0.024	0	0.01	1.4	0	6.43	0	14.84
Time 23	24.51	0	0	0	0	0	0	0.024	0	0	0.83	0	8.23	0	14.25
Time 24	24.26	0	0	0	0	0	0	0.024	0	0	0.52	0	9.07	0	13.47
27/02 2013	24.18	0	0	0	0	0	0	0.024	0	0.01	0.68	0	9.5	0	12.79
Time 02	24.33	0	0	0	0	0	0	0.024	0	0	0.88	0	9.67	0	12.59
Time 03	24.67	0	0	0	0	0	0	0.024	0	0	1.05	0	9.84	0	12.55
Time 04	24.73	0	0	0	0	0	0	0.024	0	0	1.9	0	8.86	0	12.75
Time 05	24.54	0	0	0	0	0	0	0.024	0	0	1.33	0	9.1	0	12.9
Time 06	24.34	0	0	0	0	0	0	0.024	0	0.01	0.78	0	8.88	0	13.5
Time 07	23.46	0	0	0	0	0	0	0.024	0	0.01	0.78	0	6.7	0	14.97
Time 08	22.82	0	0	0	0	0	0	0.023	0	0.01	0.48	0	4.01	0	17.34
Time 09	23.07	0	0	0	0	0	0	0.024	0	0.02	0.26	0	3.74	0	18.06
Time 10	23.27	0	0	0	0	0	0	0.024	0	0.02	0.39	0	4.25	0	17.59
Time 11	23.42	0	0	0	0	0	0	0.023	0	0.05	0.39	0	4.99	0	16.96
Time 12	23.9	0	0	0	0	0	0	0.024	0	0.03	0.69	0	6.26	0	15.79
Time 13	24.26	0	0	0	0	0	0	0.024	0	0.01	0.8	0	7.15	0	15.09
Time 14	24.64	0	0	0	0	0	0	0.024	0	0.01	0.46	0	8.33	0	14.54
Time 15	24.82	0	0	0	0	0	0	0.024	0	0	0.33	0	9.31	0	13.82
Time 16	24.94	0	0	0	0	0	0	0.024	0	0.02	0.41	0	9.94	0	13.24
Time 17	24.94	0	0	0	0	0	0	0.024	0	0.01	0.54	0	10.51	0	12.52
Time 18	24.73	0	0	0	0	0	0	0.024	0	0.01	0.52	0	10.2	0	12.72
Time 19	24.3	0	0	0	0	0	0	0.023	0	0.01	0.61	0	8.88	0	13.58
Time 20	23.9	0	0	0	0	0	0	0.024	0	0	1.64	0	6.84	0	14.28
Time 21	23.98	0	0	0	0	0	0	0.024	0	0	1.23	0	7.34	0	14.29
Time 22	24.19	0	0	0	0	0	0	0.024	0	0.02	1.54	0	7.44	0	14.07
Time 23	24.37	0	0	0	0	0	0	0.023	0	0	0.72	0	8.95	0	13.5
Time 24	24.52	0	0	0	0	0	0	0.024	0	0	0.63	0	9.72	0	12.91
28/02 2013	24.68	0	0	0	0	0	0	0.024	0	0	0.78	0	10.39	0	12.26
Time 02	24.41	0	0	0	0	0	0	0.024	0	0	1.09	0	10.01	0	12.06
Time 03	24.55	0	0	0	0	0	0	0.024	0	0.02	1.22	0	9.96	0	12.13
Time 04	24.59	0	0	0	0	0	0	0.024	0	0	1.96	0	9.34	0	12.06
Time 05	24.56	0	0	0	0	0	0	0.024	0	0	1.41	0	9.55	0	12.35
Time 06	24.37	0	0	0	0	0	0	0.024	0	0.01	0.82	0	9.6	0	12.74
Time 07	24.06	0	0	0	0	0	0	0.024	0	0.01	0.75	0	8.02	0	14.13
Time 08	23.5	0	0	0	0	0	0	0.023	0	0.03	0.72	0	5.98	0	15.75
Time 09	23.56	0	0	0	0	0	0	0.024	0	0.02	0.28	0	6.38	0	15.82
Time 10	23.93	0	0	0	0	0	0	0.024	0	0.01	0.4	0	6.84	0	15.58
Time 11	24.12	0	0	0	0	0	0	0.023	0	0.02	0.41	0	7.3	0	15.26
Time 12	24.23	0	0	0	0	0	0	0.024	0	0.03	0.66	0	7.7	0	14.68
Time 13	24.47	0	0	0	0	0	0	0.024	0	0.02	0.81	0	8.18	0	14.29
Time 14	24.28	0	0	0	0	0	0	0.023	0	0.02	0.46	0	8.66	0	13.94
Time 15	24.46	0	0	0	0	0	0	0.024	0	0	0.36	0	8.9	0	13.96
Time 16	24.27	0	0	0	0	0	0	0.024	0	0.01	0.44	0	9.17	0	13.42
Time 17	24.31	0	0	0	0	0	0	0.024	0	0	0.55	0	9.34	0	13.22
Time 18	24.21	0	0	0	0	0	0	0.023	0	0.01	0.6	0	9.22	0	13.19
Time 19	23.91	0	0	0	0	0	0	0.024	0	0.01	0.62	0	8.35	0	13.8
Time 20	23.67	0	0	0	0	0	0	0.024	0	0	1.56	0	6.82	0	14.18
Time 21	23.96	0	0	0	0	0	0	0.024	0	0	1.18	0	7.75	0	13.91
Time 22	24.11	0	0	0	0	0	0	0.024	0	0	1.24	0	8.09	0	13.61
Time 23	24.08	0	0	0	0	0	0	0.024	0	0	1.06	0	8.74	0	13.13
Time 24	24.27	0	0	0	0	0	0	0.023	0	0	0.8	0	9.86	0	12.38
01/03 2013	24.45	0	0	0	0	0	0	0.024	0	0.02	0.88	0	10.58	0	11.79
Time 02	24.62	0	0	0	0	0	0	0.024	0	0	1.12	0	10.63	0	11.6
Time 03	24.72	0	0	0	0	0	0	0.024	0	0.01	1.18	0	10.61	0	11.66
Time 04	24.66	0	0	0	0	0	0	0.024	0	0.01	1.82	0	10.03	0	11.57
Time 05	24.46	0	0	0	0	0	0	0.024	0	0	1.65	0	9.86	0	11.74
Time 06	24.13	0	0	0	0	0	0	0.024	0	0	0.9	0	9.48	0	12.57
Time 07	23.79	0	0	0	0	0	0	0.023	0	0.01	0.85	0	8.16	0	13.66
Time 08	23.06	0	0	0	0	0	0	0.024	0	0.02	0.52	0	5.76	0	15.79
Time 09	22.9	0	0	0	0	0	0	0.023	0	0.01	0.25	0	5.35	0	16.31
Time 10	23.33	0	0	0	0	0	0	0.024	0	0.02	0.32	0	5.93	0	16.03
Time 11	23.56	0	0	0	0	0	0	0.024	0	0.05	0.4	0	6.48	0	15.64
Time 12	24.01	0	0	0	0	0	0	0.023	0	0.04	0.65	0	7.54	0	14.7
Time 13	24.21	0	0	0	0	0	0	0.024	0	0.01	0.75	0	8.18	0	14.07
Time 14	24.47	0	0	0	0	0	0	0.024	0	0.02	0.43	0	9.1	0	13.69
Time 15	24.68	0	0	0	0	0	0	0.024	0	0.01	0.29	0	9.77	0	13.33
Time 16	24.72	0	0	0	0	0	0	0.023	0	0.01	0.42	0	10.13	0	12.88
Time 17	24.33	0	0	0	0	0	0	0.023	0	0.01	0.5	0	9.86	0	12.72
Time 18	23.9	0	0	0	0	0	0	0.024	0	0.01	0.56	0	9.02	0	13.14
Time 19	23.75	0	0	0	0	0	0	0.024	0	0	0.5	0	8.45	0	13.69
Time 20	23.14	0	0	0	0	0	0	0.023	0	0	0.63	0	7.22	0	14.25
Time 21	22.93	0	0	0	0	0	0	0.024	0	0.01	0.6	0	7.44	0	13.84
Time 22	23.47	0	0	0	0	0	0	0.024	0	0.02	0.52	0	8.35	0	13.5
Time 23	23.74	0	0	0	0	0	0	0.023	0	0.02	0.17	0	9.38	0	13.04
Time 24	23.83	0	0	0	0	0	0	0.024	0	0.03	0.26	0	9.86	0	12.53
02/03 2013	23.89	0	0	0	0	0	0	0.024	0	0.02	0.29	0	10.44	0	11.99
Time 02	24.06	0	0	0	0	0	0	0.024	0	0.05	0.26	0	10.82	0	11.75
Time 03	24.09	0	0	0	0	0	0	0.024	0	0.01	0.09	0	11.26	0	11.5
Time 04	24.12	0	0	0	0	0	0	0.024	0	0.01	0.28	0	11.14	0	11.48
Time 05	24.01	0	0	0	0	0	0	0.024	0	0.01	0.48	0	10.92	0	11.36
Time 06	23.7	0	0	0	0	0	0	0.024	0	0.04	0.41	0	10.78	0	11.34
Time 07	22.92	0	0	0	0	0	0	0.024	0	0.06	0.57	0	9.72	0	11.57
Time 08	23.16	0	0	0	0	0	0	0.024	0	0.03	0.37	0	9.67	0	12.02
Time 09	23.07	0	0	0	0	0	0	0.023	0	0.01	0.33	0	8.66	0	12.98
Time 10	23.18	0	0	0	0	0	0	0.024	0	0.03	0.48	0	7.7	0	13.96
Time 11	23.04	0	0	0	0	0	0	0.024	0	0.01	0.21	0	7.37	0	14.4
Time 12	23.15	0	0	0	0	0	0	0.023	0	0.01	0.26	0	7.68	0	14.18
Time 13	23.22	0	0	0	0	0	0	0.024	0	0.01	0.51	0	7.92	0	13.69
Time 14	23.25	0	0	0	0	0	0	0.024	0	0.01	0.49	0	8.21	0	13.5
Time 15	23.81	0	0	0	0	0	0	0.023	0	0.03	0.58	0	9.07	0	13
Time 16	23.89	0	0	0	0	0	0	0.024	0	0.01	0.26	0	9.74	0	12.67
Time 17	23.55	0	0	0	0	0	0	0.023	0	0.01	0.37	0	9.77	0	12.28
Time 18	23.53	0	0	0	0	0	0	0.024	0	0	0.77	0	8.95	0	12.69
Time 19	23.26	0	0	0	0	0	0	0.023	0	0	0.71	0	8.09	0	13.37
Time 20	23.05	0	0	0	0	0	0	0.023	0	0	0.24	0	7.85	0	13.89
Time 21	23.3	0	0	0	0	0	0	0.024	0	0.01	0.19	0	8.52	0	13.52
Time 22	23.29	0	0	0	0	0	0	0.024	0	0.03	0.29	0	8.83	0	13.1
Time 23	23.42	0	0	0	0	0	0	0.024	0	0.01	0.12	0	9.62	0	12.53
Time 24	23.56	0	0	0	0	0	0	0.024	0	0	0.17	0	10.2	0	12.04
03/03 2013	23.61	0	0	0	0	0	0	0.024	0	0	0.17	0	10.51	0	11.74
Time 02	23.7	0	0	0	0	0	0	0.023	0	0	0.16	0	10.87	0	11.51
Time 03	23.84	0	0	0	0	0	0	0.024	0	0	0.13	0	11.09	0	11.42
Time 04	23.66	0	0	0	0	0	0	0.024	0	0	0.13	0	10.78	0	11.6
Time 05	23.7	0	0	0	0	0	0	0.023	0	0	0.12	0	10.78	0	11.63
Time 06	23.66	0	0	0	0	0	0	0.024	0	0.01	0.02	0	10.58	0	11.86
Time 07	23.03	0	0	0	0	0	0	0.023	0	0.01	0.06	0	9.65	0	12.28
Time 08	23.11	0	0	0	0	0	0	0.024	0	0.04	0.2	0	9.34	0	12.53
Time 09	23.24	0	0	0	0	0	0	0.024	0	0.02	0.08	0	9.02	0	13.06
Time 10	22.93	0	0	0	0	0	0	0.023	0	0.01	0.12	0	8.3	0	13.47
Time 11	22.69	0	0	0	0	0	0	0.024	0	0	0.31	0	7.97	0	13.36
Time 12	23.26	0	0	0	0	0	0	0.024	0	0	0.68	0	8.64	0	12.8
Time 13	23.12	0	0	0	0	0	0	0.024	0	0.01	0.71	0	8.83	0	12.48
Time 14	23.66	0	0	0	0	0	0	0.024	0	0.01	0.49	0	9.72	0	12.26
Time 15	23.45	0	0	0	0	0	0	0.025	0	0.01	0.51	0	9.86	0	11.92
Time 16	23.65	0	0	0	0	0	0	0.024	0	0.01	0.41	0	10.01	0	12.08
Time 17	24.04	0	0	0	0	0	0	0.024	0	0.02	0.42	0	10.22	0	12.18
Time 18	24.18	0	0	0	0	0	0	0.024	0	0.01	0.52	0	9.94	0	12.51
Time 19	23.75	0	0	0	0	0	0	0.024	0	0.02	0.47	0	8.98	0	13.16
Time 20	23.23	0	0	0	0	0	0	0.024	0	0.01	0.62	0	8.16	0	13.4
Time 21	22.93	0	0	0	0	0	0	0.024	0	0.01	0.47	0	8.02	0	13.4
Time 22	22.97	0	0	0	0	0	0	0.024	0	0.02	0.68	0	7.97	0	13.31
Time 23	23.23	0	0	0	0	0	0	0.024	0	0.01	0.15	0	9.12	0	12.86
Time 24	23.22	0	0	0	0	0	0	0.025	0	0.03	0.28	0	9.65	0	12.21
04/03 2013	23.43	0	0	0	0	0	0	0.024	0	0.01	0.33	0	10.37	0	11.55
Time 02	23.71	0	0	0	0	0	0	0.024	0	0.01	0.22	0	10.97	0	11.35
Time 03	23.94	0	0	0	0	0	0	0.024	0	0	0.59	0	10.78	0	11.36
Time 04	24.07	0	0	0	0	0	0	0.024	0	0	0.82	0	10.66	0	11.37
Time 05	23.93	0	0	0	0	0	0	0.024	0	0.01	0.24	0	10.92	0	11.54
Time 06	23.59	0	0	0	0	0	0	0.024	0	0.02	0.41	0	10.13	0	11.89
Time 07	23.16	0	0	0	0	0	0	0.023	0	0.02	0.65	0	8.4	0	13.05
Time 08	22.52	0	0	0	0	0	0	0.024	0	0.02	0.4	0	5.93	0	15.28
Time 09	22.55	0	0	0	0	0	0	0.023	0	0.01	0.24	0	5.83	0	15.5
Time 10	22.68	0	0	0	0	0	0	0.024	0	0.02	0.34	0	5.9	0	15.46
Time 11	22.66	0	0	0	0	0	0	0.024	0	0.03	0.29	0	6.07	0	15.29
Time 12	22.88	0	0	0	0	0	0	0.024	0	0	0.33	0	6.65	0	14.87
Time 13	23.32	0	0	0	0	0	0	0.024	0	0.02	0.75	0	6.74	0	14.78
Time 14	23.3	0	0	0	0	0	0	0.024	0	0.02	0.44	0	7.06	0	14.7
Time 15	23.37	0	0	0	0	0	0	0.024	0	0	0.31	0	7.15	0	14.83
Time 16	23.66	0	0	0	0	0	0	0.024	0	0.01	0.4	0	7.42	0	14.74
Time 17	23.38	0	0	0	0	0	0	0.024	0	0.01	0.48	0	7.51	0	14.31
Time 18	23.22	0	0	0	0	0	0	0.024	0	0.01	0.5	0	7.3	0	14.38
Time 19	23.64	0	0	0	0	0	0	0.024	0	0	0.55	0	7.42	0	14.54
Time 20	23.42	0	0	0	0	0	0	0.023	0	0	1.54	0	6.34	0	14.49
Time 21	23.35	0	0	0	0	0	0	0.024	0	0	1.09	0	6.91	0	14.28
Time 22	23.42	0	0	0	0	0	0	0.024	0	0.01	1.14	0	7.42	0	13.76
Time 23	23.52	0	0	0	0	0	0	0.024	0	0	1	0	8.64	0	12.75
Time 24	23.64	0	0	0	0	0	0	0.024	0	0	0.59	0	9.82	0	12.06
05/03 2013	24.12	0	0	0	0	0	0	0.024	0	0	1	0	10.49	0	11.39
Time 02	24.27	0	0	0	0	0	0	0.024	0	0	1.26	0	10.7	0	11.05
Time 03	24.21	0	0	0	0	0	0	0.024	0	0.04	0.99	0	11.04	0	10.97
Time 04	24.18	0	0	0	0	0	0	0.024	0	0.04	0.95	0	11.06	0	10.99
Time 05	24.1	0	0	0	0	0	0	0.024	0	0	1.26	0	10.34	0	11.34
Time 06	23.66	0	0	0	0	0	0	0.025	0	0	1.23	0	9.65	0	11.7
Time 07	23.21	0	0	0	0	0	0	0.024	0	0	1.45	0	7.8	0	12.93
Time 08	22.7	0	0	0	0	0	0	0.024	0	0	1.55	0	5.06	0	15.17
Time 09	22.62	0	0	0	0	0	0	0.024	0	0	0.62	0	5.76	0	15.31
Time 10	23.09	0	0	0	0	0	0	0.024	0	0	0.67	0	6.26	0	15.2
Time 11	23.6	0	0	0	0	0	0	0.024	0	0.01	0.68	0	6.89	0	14.97
Time 12	23.61	0	0	0	0	0	0	0.024	0	0.01	0.84	0	6.84	0	14.9
Time 13	23.75	0	0	0	0	0	0	0.024	0	0	1.04	0	6.94	0	14.75
Time 14	23.76	0	0	0	0	0	0	0.024	0	0	0.72	0	7.66	0	14.3
Time 15	24	0	0	0	0	0	0	0.024	0	0	0.62	0	8.3	0	13.96
Time 16	24.21	0	0	0	0	0	0	0.024	0	0	0.66	0	8.86	0	13.56
Time 17	23.88	0	0	0	0	0	0	0.024	0	0	0.72	0	9	0	13.06
Time 18	23.74	0	0	0	0	0	0	0.025	0	0.01	0.75	0	8.83	0	13.09
Time 19	23.54	0	0	0	0	0	0	0.024	0	0	0.86	0	7.7	0	13.92
Time 20	23.03	0	0	0	0	0	0	0.024	0	0	1.5	0	5.98	0	14.61
Time 21	22.88	0	0	0	0	0	0	0.024	0	0	1.06	0	6.29	0	14.6
Time 22	23.22	0	0	0	0	0	0	0.024	0	0.02	1.04	0	7.06	0	14.13
Time 23	23.4	0	0	0	0	0	0	0.025	0	0	0.72	0	8.28	0	13.39
Time 24	23.53	0	0	0	0	0	0	0.024	0	0	0.96	0	9.02	0	12.51
06/03 2013	23.99	0	0	0	0	0	0	0.024	0	0.02	1.17	0	9.84	0	11.88
Time 02	24.17	0	0	0	0	0	0	0.025	0	0	1.63	0	9.84	0	11.57
Time 03	24.19	0	0	0	0	0	0	0.024	0	0	1.58	0	9.98	0	11.52
Time 04	24.15	0	0	0	0	0	0	0.024	0	0	1.93	0	9.62	0	11.51
Time 05	23.96	0	0	0	0	0	0	0.024	0	0	1.49	0	9.7	0	11.67
Time 06	23.81	0	0	0	0	0	0	0.025	0	0	1.01	0	9.41	0	12.33
Time 07	23.34	0	0	0	0	0	0	0.024	0	0	1.01	0	7.56	0	13.75
Time 08	22.96	0	0	0	0	0	0	0.024	0	0	0.75	0	5.47	0	15.82
Time 09	23.06	0	0	0	0	0	0	0.024	0	0	0.38	0	5.4	0	16.31
Time 10	22.98	0	0	0	0	0	0	0.024	0	0	0.65	0	5.45	0	15.9
Time 11	22.86	0	0	0	0	0	0	0.024	0	0	0.66	0	6.26	0	14.94
Time 12	22.87	0	0	0	0	0	0	0.025	0	0.01	0.84	0	6.91	0	14.11
Time 13	23.16	0	0	0	0	0	0	0.024	0	0	0.95	0	8.06	0	13.1
Time 14	23.46	0	0	0	0	0	0	0.024	0	0	0.67	0	8.9	0	12.78
Time 15	23.58	0	0	0	0	0	0	0.025	0	0	0.59	0	9.6	0	12.26
Time 16	23.38	0	0	0	0	0	0	0.024	0	0	0.63	0	9.41	0	12.22
Time 17	23.55	0	0	0	0	0	0	0.024	0	0	0.76	0	9.84	0	11.83
Time 18	23.57	0	0	0	0	0	0	0.024	0	0	0.82	0	9.86	0	11.79
Time 19	23.47	0	0	0	0	0	0	0.024	0	0	0.85	0	9	0	12.53
Time 20	22.8	0	0	0	0	0	0	0.025	0	0	1.62	0	7.06	0	13.19
Time 21	22.75	0	0	0	0	0	0	0.024	0	0	1.21	0	7.61	0	12.96
Time 22	23.02	0	0	0	0	0	0	0.025	0	0.01	1.18	0	8.18	0	12.65
Time 23	22.94	0	0	0	0	0	0	0.024	0	0	1.07	0	8.95	0	11.93
Time 24	23.15	0	0	0	0	0	0	0.025	0	0	0.66	0	10.25	0	11.2
07/03 2013	23.55	0	0	0	0	0	0	0.024	0	0	1.26	0	10.49	0	10.7
Time 02	23.97	0	0	0	0	0	0	0.024	0	0	1.92	0	10.49	0	10.45
Time 03	24.19	0	0	0	0	0	0	0.024	0	0	1.58	0	10.97	0	10.48
Time 04	24.07	0	0	0	0	0	0	0.024	0	0.01	1.96	0	10.49	0	10.5
Time 05	24.08	0	0	0	0	0	0	0.024	0	0	1.54	0	10.51	0	10.82
Time 06	23.87	0	0	0	0	0	0	0.024	0	0	1.04	0	10.06	0	11.66
Time 07	23.15	0	0	0	0	0	0	0.025	0	0	1.02	0	8.47	0	12.66
Time 08	22.59	0	0	0	0	0	0	0.024	0	0	0.79	0	6.72	0	14.17
Time 09	22.57	0	0	0	0	0	0	0.024	0	0	0.66	0	6.12	0	14.86
Time 10	22.65	0	0	0	0	0	0	0.024	0	0.02	0.67	0	6.12	0	14.95
Time 11	22.86	0	0	0	0	0	0	0.024	0	0.01	0.65	0	6.72	0	14.52
Time 12	22.94	0	0	0	0	0	0	0.024	0	0	0.88	0	6.96	0	14.15
Time 13	23.14	0	0	0	0	0	0	0.024	0	0	0.94	0	7.49	0	13.69
Time 14	23.19	0	0	0	0	0	0	0.024	0	0	0.67	0	8.09	0	13.4
Time 15	23.54	0	0	0	0	0	0	0.024	0	0	0.62	0	8.57	0	13.29
Time 16	23.6	0	0	0	0	0	0	0.024	0	0	0.67	0	8.9	0	12.93
Time 17	23.48	0	0	0	0	0	0	0.024	0	0	0.79	0	8.78	0	12.88
Time 18	23.34	0	0	0	0	0	0	0.024	0	0	0.77	0	8.33	0	13.22
Time 19	22.96	0	0	0	0	0	0	0.024	0	0	0.87	0	7.32	0	13.78
Time 20	22.58	0	0	0	0	0	0	0.025	0	0	1.58	0	5.95	0	14.17
Time 21	22.66	0	0	0	0	0	0	0.024	0	0.01	1.12	0	6.41	0	14.2
Time 22	22.83	0	0	0	0	0	0	0.024	0	0.01	1.25	0	6.84	0	13.83
Time 23	23.19	0	0	0	0	0	0	0.025	0	0	1.1	0	7.8	0	13.29
Time 24	23.5	0	0	0	0	0	0	0.024	0	0	0.69	0	9.36	0	12.43
08/03 2013	23.67	0	0	0	0	0	0	0.024	0	0.01	1.16	0	9.58	0	11.88
Time 02	23.49	0	0	0	0	0	0	0.024	0	0	2.04	0	8.81	0	11.63
Time 03	23.44	0	0	0	0	0	0	0.024	0	0.01	1.81	0	9.07	0	11.57
Time 04	23.38	0	0	0	0	0	0	0.024	0	0.01	2.04	0	8.71	0	11.65
Time 05	23.27	0	0	0	0	0	0	0.025	0	0	1.47	0	8.98	0	11.81
Time 06	23.2	0	0	0	0	0	0	0.023	0	0	1.07	0	8.86	0	12.3
Time 07	22.75	0	0	0	0	0	0	0.024	0	0	1.09	0	7.06	0	13.67
Time 08	21.96	0	0	0	0	0	0	0.024	0	0	0.81	0	4.51	0	15.81
Time 09	21.95	0	0	0	0	0	0	0.023	0	0	0.65	0	3.77	0	16.69
Time 10	22.07	0	0	0	0	0	0	0.024	0	0.06	0.75	0	4.27	0	16.23
Time 11	22.62	0	0	0	0	0	0	0.023	0	0.05	1.04	0	4.63	0	16.1
Time 12	22.83	0	0	0	0	0	0	0.025	0	0.04	1.18	0	4.97	0	15.79
Time 13	23.15	0	0	0	0	0	0	0.023	0	0	1.03	0	5.76	0	15.4
Time 14	23.01	0	0	0	0	0	0	0.024	0	0	0.75	0	6.22	0	15.07
Time 15	22.86	0	0	0	0	0	0	0.024	0	0	0.61	0	6.91	0	14.37
Time 16	22.75	0	0	0	0	0	0	0.024	0	0	0.66	0	7.18	0	13.97
Time 17	22.78	0	0	0	0	0	0	0.024	0	0	0.78	0	7.37	0	13.69
Time 18	22.55	0	0	0	0	0	0	0.024	0	0	0.82	0	7.01	0	13.78
Time 19	22.38	0	0	0	0	0	0	0.024	0	0	0.77	0	6.14	0	14.58
Time 20	22.13	0	0	0	0	0	0	0.024	0	0	0.84	0	5.33	0	15.1
Time 21	22.13	0	0	0	0	0	0	0.025	0	0	0.84	0	5.59	0	14.82
Time 22	22.32	0	0	0	0	0	0	0.024	0	0	0.75	0	6.26	0	14.43
Time 23	22.46	0	0	0	0	0	0	0.024	0	0	0.47	0	7.39	0	13.67
Time 24	22.83	0	0	0	0	0	0	0.024	0	0	0.52	0	8.09	0	13.29
09/03 2013	22.57	0	0	0	0	0	0	0.025	0	0	0.86	0	8.06	0	12.74
Time 02	22.7	0	0	0	0	0	0	0.024	0	0	0.98	0	8.4	0	12.35
Time 03	22.7	0	0	0	0	0	0	0.025	0	0	0.73	0	8.69	0	12.33
Time 04	22.8	0	0	0	0	0	0	0.024	0	0	1.25	0	8.3	0	12.3
Time 05	22.77	0	0	0	0	0	0	0.024	0	0	0.52	0	8.86	0	12.44
Time 06	22.52	0	0	0	0	0	0	0.025	0	0	0.74	0	8.38	0	12.5
Time 07	22.28	0	0	0	0	0	0	0.024	0	0	0.89	0	7.58	0	12.91
Time 08	22.23	0	0	0	0	0	0	0.025	0	0	0.72	0	7.22	0	13.42
Time 09	22.01	0	0	0	0	0	0	0.024	0	0	0.62	0	6.17	0	14.35
Time 10	22.01	0	0	0	0	0	0	0.024	0	0.03	0.71	0	5.69	0	14.75
Time 11	22.14	0	0	0	0	0	0	0.024	0	0	0.47	0	5.95	0	14.86
Time 12	22.53	0	0	0	0	0	0	0.025	0	0	0.52	0	6.48	0	14.61
Time 13	22.69	0	0	0	0	0	0	0.024	0	0	0.86	0	6.67	0	14.23
Time 14	22.7	0	0	0	0	0	0	0.024	0	0.01	0.79	0	7.18	0	13.8
Time 15	22.43	0	0	0	0	0	0	0.024	0	0	0.52	0	7.56	0	13.43
Time 16	22.4	0	0	0	0	0	0	0.024	0	0	0.38	0	7.87	0	13.22
Time 17	22.24	0	0	0	0	0	0	0.024	0	0	0.52	0	7.63	0	13.21
Time 18	21.99	0	0	0	0	0	0	0.025	0	0	1.02	0	6.55	0	13.56
Time 19	21.83	0	0	0	0	0	0	0.024	0	0	0.79	0	5.74	0	14.47
Time 20	21.45	0	0	0	0	0	0	0.024	0	0	0.46	0	5.33	0	14.86
Time 21	21.43	0	0	0	0	0	0	0.024	0	0	0.44	0	5.52	0	14.66
Time 22	21.69	0	0	0	0	0	0	0.025	0	0	0.53	0	6.1	0	14.23
Time 23	22.15	0	0	0	0	0	0	0.024	0	0	0.34	0	7.06	0	13.88
Time 24	22.34	0	0	0	0	0	0	0.024	0	0	0.25	0	7.54	0	13.62
10/03 2013	22.52	0	0	0	0	0	0	0.025	0	0	0.23	0	8.09	0	13.35
Time 02	22.52	0	0	0	0	0	0	0.024	0	0	0.26	0	8.33	0	12.98
Time 03	22.48	0	0	0	0	0	0	0.024	0	0	0.27	0	8.42	0	12.83
Time 04	22.37	0	0	0	0	0	0	0.025	0	0	0.27	0	8.26	0	12.97
Time 05	22.19	0	0	0	0	0	0	0.024	0	0	0.28	0	8.02	0	13
Time 06	22.26	0	0	0	0	0	0	0.024	0	0	0.36	0	7.85	0	13.16
Time 07	21.71	0	0	0	0	0	0	0.024	0	0	0.41	0	6.98	0	13.46
Time 08	21.68	0	0	0	0	0	0	0.025	0	0	0.53	0	6.72	0	13.61
Time 09	21.49	0	0	0	0	0	0	0.024	0	0	0.41	0	6.05	0	14.2
Time 10	21.38	0	0	0	0	0	0	0.024	0	0	0.43	0	5.52	0	14.65
Time 11	21.52	0	0	0	0	0	0	0.024	0	0	0.47	0	5.45	0	14.79
Time 12	21.7	0	0	0	0	0	0	0.025	0	0	0.85	0	5.35	0	14.65
Time 13	21.87	0	0	0	0	0	0	0.024	0	0	1.06	0	5.57	0	14.4
Time 14	22.1	0	0	0	0	0	0	0.024	0	0	0.62	0	6	0	14.62
Time 15	22.2	0	0	0	0	0	0	0.025	0	0	0.65	0	6.19	0	14.48
Time 16	22.21	0	0	0	0	0	0	0.024	0	0	0.64	0	6.72	0	13.97
Time 17	22.12	0	0	0	0	0	0	0.025	0	0	0.71	0	6.77	0	13.77
Time 18	22.03	0	0	0	0	0	0	0.024	0	0	0.69	0	6.58	0	13.89
Time 19	22.06	0	0	0	0	0	0	0.024	0	0	0.74	0	5.95	0	14.53
Time 20	21.6	0	0	0	0	0	0	0.025	0	0	0.81	0	4.63	0	15.34
Time 21	21.18	0	0	0	0	0	0	0.024	0	0	0.91	0	4.2	0	15.31
Time 22	21.29	0	0	0	0	0	0	0.024	0	0	0.99	0	4.34	0	15.18
Time 23	21.52	0	0	0	0	0	0	0.025	0	0	0.44	0	5.3	0	14.99
Time 24	21.53	0	0	0	0	0	0	0.024	0	0	0.59	0	5.81	0	14.34
11/03 2013	21.74	0	0	0	0	0	0	0.025	0	0	0.68	0	6.48	0	13.8
Time 02	21.94	0	0	0	0	0	0	0.025	0	0	0.49	0	7.03	0	13.59
Time 03	22.31	0	0	0	0	0	0	0.024	0	0	0.44	0	7.39	0	13.6
Time 04	22.09	0	0	0	0	0	0	0.025	0	0	0.68	0	6.58	0	14
Time 05	21.92	0	0	0	0	0	0	0.024	0	0	0.41	0	6.48	0	14.21
Time 06	21.84	0	0	0	0	0	0	0.025	0	0	0.72	0	5.66	0	14.67
Time 07	22.02	0	0	0	0	0	0	0.025	0	0	0.99	0	3.91	0	16.28
Time 08	21.88	0	0	0	0	0	0	0.024	0	0.02	0.84	0	1.92	0	18.33
Time 09	21.53	0	0	0	0	0	0	0.024	0	0	0.62	0	1.3	0	18.76
Time 10	21.14	0	0	0	0	0	0	0.025	0	0	0.69	0	1.37	0	18.3
Time 11	21.96	0	0	0	0	0	0	0.024	0	0.01	0.71	0	2.5	0	17.9
Time 12	22.14	0	0	0	0	0	0	0.025	0	0	0.62	0	3.43	0	17.2
Time 13	22.37	0	0	0	0	0	0	0.024	0	0	0.99	0	3.82	0	16.65
Time 14	22.6	0	0	0	0	0	0	0.025	0	0	0.71	0	5.11	0	15.86
Time 15	22.65	0	0	0	0	0	0	0.025	0	0	0.64	0	5.57	0	15.5
Time 16	22.88	0	0	0	0	0	0	0.024	0	0	0.69	0	6.26	0	14.96
Time 17	22.82	0	0	0	0	0	0	0.025	0	0	0.8	0	6.55	0	14.52
Time 18	22.62	0	0	0	0	0	0	0.024	0	0	0.82	0	6.5	0	14.39
Time 19	22.8	0	0	0	0	0	0	0.025	0	0	0.9	0	6.1	0	14.89
Time 20	22.16	0	0	0	0	0	0	0.024	0	0	1.62	0	3.98	0	15.7
Time 21	22.02	0	0	0	0	0	0	0.025	0	0	1.12	0	4.37	0	15.69
Time 22	22.31	0	0	0	0	0	0	0.024	0	0.01	1.15	0	4.92	0	15.42
Time 23	22.31	0	0	0	0	0	0	0.025	0	0	0.95	0	5.62	0	14.89
Time 24	22.32	0	0	0	0	0	0	0.025	0	0	0.66	0	6.5	0	14.26
12/03 2013	22.41	0	0	0	0	0	0	0.024	0	0.01	0.65	0	7.37	0	13.53
Time 02	22.64	0	0	0	0	0	0	0.025	0	0	0.99	0	7.39	0	13.33
Time 03	22.77	0	0	0	0	0	0	0.025	0	0	1.17	0	7.3	0	13.4
Time 04	22.7	0	0	0	0	0	0	0.024	0	0	1.8	0	6.5	0	13.5
Time 05	22.61	0	0	0	0	0	0	0.025	0	0	1.54	0	6.46	0	13.74
Time 06	22.06	0	0	0	0	0	0	0.025	0	0	0.86	0	5.76	0	14.61
Time 07	21.64	0	0	0	0	0	0	0.025	0	0.01	0.91	0	4.08	0	15.86
Time 08	21.39	0	0	0	0	0	0	0.024	0	0.02	0.58	0	2.59	0	17.46
Time 09	21.12	0.04	0	0	0	0	0	0.024	0	0.02	0.39	0.05	2.02	0	17.92
Time 10	19.57	1.07	0	0	0	0	0	0.024	0	0.04	0.42	0.26	0.14	0	17.6
Time 11	19.4	0.85	0	0	0	0	0	0.025	0	0.09	0.45	0.12	0.6	0	17.06
Time 12	21	0.22	0	0	0	0	0	0.024	0	0.07	0.85	0.12	3.29	0	16.07
Time 13	22.39	0	0	0	0	0	0	0.024	0	0.02	1.21	0	5.11	0	15.14
Time 14	22.75	0	0	0	0	0	0	0.025	0	0.01	0.91	0	5.98	0	14.92
Time 15	23.21	0	0	0	0	0	0	0.024	0	0	0.77	0	6.62	0	14.81
Time 16	22.96	0	0	0	0	0	0	0.023	0	0.01	0.87	0	6.74	0	14.38
Time 17	22.84	0	0	0	0	0	0	0.024	0	0	0.97	0	7.06	0	13.88
Time 18	23.25	0	0	0	0	0	0	0.024	0	0	1.03	0	7.42	0	13.82
Time 19	22.64	0	0	0	0	0	0	0.024	0	0	1.21	0	6.14	0	14.38
Time 20	22.29	0	0	0	0	0	0	0.024	0	0	1.65	0	4.58	0	15.16
Time 21	22.2	0	0	0	0	0	0	0.025	0	0	1.17	0	5.09	0	15.1
Time 22	22.47	0	0	0	0	0	0	0.024	0	0.01	1.16	0	5.71	0	14.71
Time 23	22.48	0	0	0	0	0	0	0.024	0	0	0.96	0	6.38	0	14.25
Time 24	22.54	0	0	0	0	0	0	0.024	0	0	0.62	0	7.49	0	13.53
13/03 2013	23.01	0	0	0	0	0	0	0.024	0	0	0.81	0	8.14	0	13.09
Time 02	23.12	0	0	0	0	0	0	0.025	0	0	1.07	0	8.21	0	12.9
Time 03	23.09	0	0	0	0	0	0	0.024	0	0.01	1.23	0	8.11	0	12.78
Time 04	22.82	0	0	0	0	0	0	0.024	0	0.01	1.89	0	7.3	0	12.72
Time 05	22.75	0	0	0	0	0	0	0.024	0	0	1.53	0	7.39	0	12.88
Time 06	22.53	0	0	0	0	0	0	0.024	0	0	1.24	0	7.18	0	13.22
Time 07	22.5	0	0	0	0	0	0	0.024	0	0	1.46	0	5.33	0	14.82
Time 08	22.14	0	0	0	0	0	0	0.024	0	0.01	1.18	0	3.26	0	16.87
Time 09	21.99	0	0	0	0	0	0	0.023	0	0	0.7	0	2.78	0	17.62
Time 10	21.73	0	0	0	0	0	0	0.024	0	0.02	0.68	0	2.76	0	17.48
Time 11	21.82	0	0	0	0	0	0	0.023	0	0.01	0.73	0	3	0	17.26
Time 12	22.2	0	0	0	0	0	0	0.024	0	0.01	0.97	0	3.84	0	16.5
Time 13	22.45	0	0	0	0	0	0	0.023	0	0.01	0.77	0	4.49	0	16.33
Time 14	22.38	0	0	0	0	0	0	0.024	0	0.01	0.45	0	5.3	0	15.7
Time 15	22.83	0	0	0	0	0	0	0.025	0	0.01	0.34	0	5.78	0	15.77
Time 16	22.86	0	0	0	0	0	0	0.024	0	0.02	0.43	0	5.9	0	15.59
Time 17	22.85	0	0	0	0	0	0	0.025	0	0.02	0.42	0	6.48	0	15
Time 18	22.95	0	0	0	0	0	0	0.025	0	0.02	0.47	0	6.72	0	14.85
Time 19	22.7	0	0	0	0	0	0	0.025	0	0.01	0.62	0	5.83	0	15.33
Time 20	22.13	0	0	0	0	0	0	0.024	0	0	1.67	0.02	3.36	0	16.28
Time 21	21.9	0	0	0	0	0	0	0.025	0	0	1.15	0	3.72	0	16.2
Time 22	22.38	0	0	0	0	0	0	0.025	0	0.01	1.22	0	4.54	0	15.78
Time 23	22.22	0	0	0	0	0	0	0.025	0	0	0.96	0	5.09	0	15.34
Time 24	22.5	0	0	0	0	0	0	0.025	0	0	0.65	0	6.38	0	14.61
14/03 2013	22.88	0	0	0	0	0	0	0.025	0	0.01	0.87	0	7.06	0	14.04
Time 02	22.84	0	0	0	0	0	0	0.024	0	0.01	1.18	0	6.89	0	13.91
Time 03	22.92	0	0	0	0	0	0	0.025	0	0.01	1.59	0	6.6	0	13.84
Time 04	22.53	0	0	0	0	0	0	0.024	0	0.01	1.61	0	6.14	0	13.94
Time 05	22.77	0	0	0	0	0	0	0.025	0	0	1.48	0	6.17	0	14.25
Time 06	22.53	0	0	0	0	0	0	0.024	0	0	0.83	0	6	0	14.82
Time 07	22.17	0	0	0	0	0	0	0.025	0	0.01	0.81	0	4.01	0	16.52
Time 08	21.46	0	0	0	0	0	0	0.024	0	0.02	0.62	0	1.54	0	18.56
Time 09	20.93	0	0	0	0	0	0	0.025	0	0.02	0.39	0	0.94	0	18.84
Time 10	20.97	0	0	0	0	0	0	0.024	0	0.05	0.48	0.02	1.18	0	18.57
Time 11	21.98	0	0	0	0	0	0	0.025	0	0.04	0.41	0	2.62	0	18.09
Time 12	22.32	0	0	0	0	0	0	0.025	0	0.04	0.61	0	3.36	0	17.47
Time 13	21.97	0	0	0	0	0	0	0.025	0	0.01	0.75	0	3.94	0	16.42
Time 14	22.39	0	0	0	0	0	0	0.025	0	0.02	0.43	0	4.99	0	16.04
Time 15	22.78	0	0	0	0	0	0	0.025	0	0	0.33	0	6.02	0	15.49
Time 16	22.48	0	0	0	0	0	0	0.025	0	0.02	0.41	0	6.22	0	14.94
Time 17	22.55	0	0	0	0	0	0	0.025	0	0.02	0.51	0	6.38	0	14.75
Time 18	22.58	0	0	0	0	0	0	0.025	0	0.01	0.53	0	6.22	0	14.92
Time 19	22.58	0	0	0	0	0	0	0.025	0	0.01	0.61	0	5.76	0	15.28
Time 20	22.32	0	0	0	0	0	0	0.025	0	0	1.59	0	3.91	0	15.95
Time 21	22.28	0	0	0	0	0	0	0.025	0	0	1.12	0	4.56	0	15.72
Time 22	22.74	0	0	0	0	0	0	0.025	0	0.01	1.11	0	5.35	0	15.38
Time 23	22.84	0	0	0	0	0	0	0.024	0	0	0.96	0	6.43	0	14.51
Time 24	23.05	0	0	0	0	0	0	0.026	0	0	0.76	0	7.54	0	13.78
15/03 2013	22.55	0	0	0	0	0	0	0.024	0	0	0.88	0	7.68	0	13.09
Time 02	22.93	0	0	0	0	0	0	0.025	0	0	1.09	0	7.9	0	12.95
Time 03	23.06	0	0	0	0	0	0	0.025	0	0	1.26	0	7.9	0	12.96
Time 04	23.22	0	0	0	0	0	0	0.024	0	0	1.83	0	7.37	0	13.07
Time 05	22.99	0	0	0	0	0	0	0.025	0	0	1.5	0	7.39	0	13.14
Time 06	22.8	0	0	0	0	0	0	0.025	0	0	0.74	0	7.32	0	13.82
Time 07	22.95	0	0	0	0	0	0	0.025	0	0	0.82	0	6.48	0	14.74
Time 08	22.72	0	0	0	0	0	0	0.024	0	0.01	0.61	0	4.54	0	16.67
Time 09	22.46	0	0	0	0	0	0	0.025	0	0	0.36	0	3.72	0	17.48
Time 10	19.17	1.87	0	0	0	0	0	0.024	0	0.01	0.38	1.18	0.02	0	17.53
Time 11	19.13	1.86	0	0	0	0	0	0.024	0	0.04	0.47	1.15	0	0	17.43
Time 12	22.19	0.24	0	0	0	0	0	0.025	0	0.03	0.72	0.24	3.29	0	17.28
Time 13	22.77	0	0	0	0	0	0	0.024	0	0	0.77	0	4.01	0	17.09
Time 14	23.12	0	0	0	0	0	0	0.024	0	0.01	0.62	0	4.63	0	16.92
Time 15	23.06	0	0	0	0	0	0	0.025	0	0	0.4	0	4.82	0	16.88
Time 16	23.01	0	0	0	0	0	0	0.024	0	0.01	0.54	0	5.23	0	16.28
Time 17	22.82	0	0	0	0	0	0	0.025	0	0	0.65	0	5.52	0	15.73
Time 18	22.97	0	0	0	0	0	0	0.024	0	0	0.69	0	5.69	0	15.65
Time 19	23.35	0	0	0	0	0	0	0.025	0	0.01	0.62	0	5.88	0	15.88
Time 20	22.35	0	0	0	0	0	0	0.024	0	0	0.59	0	4.7	0	16.19
Time 21	22.5	0	0	0	0	0	0	0.025	0	0	0.71	0	5.3	0	15.6
Time 22	23.13	0	0	0	0	0	0	0.025	0	0.01	0.6	0	6.46	0	15.08
Time 23	23.31	0	0	0	0	0	0	0.025	0	0	0.35	0	7.63	0	14.34
Time 24	23.57	0	0	0	0	0	0	0.024	0	0.02	0.39	0	8.4	0	13.75
16/03 2013	23.06	0	0	0	0	0	0	0.025	0	0.02	0.35	0	8.64	0	13.09
Time 02	23.07	0	0	0	0	0	0	0.025	0	0.01	0.36	0	8.98	0	12.74
Time 03	23.45	0	0	0	0	0	0	0.025	0	0	0.17	0	9.84	0	12.35
Time 04	23.34	0	0	0	0	0	0	0.025	0	0	0.46	0	9.55	0	12.3
Time 05	23.09	0	0	0	0	0	0	0.025	0	0	0.45	0	9.26	0	12.34
Time 06	23.16	0	0	0	0	0	0	0.025	0	0	0.31	0	9.41	0	12.41
Time 07	22.98	0	0	0	0	0	0	0.024	0	0	0.24	0	9	0	12.73
Time 08	22.96	0	0	0	0	0	0	0.025	0	0.01	0.39	0	8.38	0	13.25
Time 09	22.91	0	0	0	0	0	0	0.024	0	0.02	0.37	0	7.34	0	14.25
Time 10	23.06	0	0	0	0	0	0	0.024	0	0.06	0.59	0	6.67	0	14.87
Time 11	22.95	0	0	0	0	0	0	0.025	0	0.02	0.51	0	6.34	0	15.18
Time 12	23.03	0	0	0	0	0	0	0.024	0	0.03	0.44	0	6.41	0	15.29
Time 13	23.07	0	0	0	0	0	0	0.025	0	0.01	0.57	0	6.1	0	15.42
Time 14	23.22	0	0	0	0	0	0	0.024	0	0.01	0.37	0	6.58	0	15.31
Time 15	23.14	0	0	0	0	0	0	0.024	0	0	0.29	0	6.65	0	15.25
Time 16	23.23	0	0	0	0	0	0	0.025	0	0	0.23	0	7.03	0	14.96
Time 17	23.17	0	0	0	0	0	0	0.024	0	0	0.37	0	6.96	0	14.86
Time 18	23.04	0	0	0	0	0	0	0.025	0	0	0.87	0	6.29	0	14.92
Time 19	22.95	0	0	0	0	0	0	0.024	0	0.02	0.89	0	5.9	0	15.26
Time 20	23.04	0	0	0	0	0	0	0.025	0	0.01	0.39	0	6.29	0	15.42
Time 21	23.07	0	0	0	0	0	0	0.024	0	0	0.24	0	6.96	0	14.89
Time 22	23.68	0	0	0	0	0	0	0.024	0	0.02	0.31	0	7.94	0	14.4
Time 23	24.21	0	0	0	0	0	0	0.025	0	0.01	0.09	0	9.12	0	13.88
Time 24	24.29	0	0	0	0	0	0	0.024	0	0.04	0	0	9.94	0	13.26
17/03 2013	24.43	0	0	0	0	0	0	0.025	0	0.04	0	0	10.46	0	12.83
Time 02	24.39	0	0	0	0	0	0	0.024	0	0.04	0	0	10.63	0	12.64
Time 03	24.45	0	0	0	0	0	0	0.025	0	0.05	0	0	10.82	0	12.48
Time 04	24.5	0	0	0	0	0	0	0.025	0	0.01	0	0	11.06	0	12.22
Time 05	24.34	0	0	0	0	0	0	0.024	0	0	0.09	0	10.9	0	12.19
Time 06	24.46	0	0	0	0	0	0	0.025	0	0	0.08	0	10.9	0	12.27
Time 07	24.34	0	0	0	0	0	0	0.024	0	0	0.15	0	10.63	0	12.41
Time 08	24.54	0	0	0	0	0	0	0.025	0	0.01	0.29	0	10.46	0	12.64
Time 09	24.65	0	0	0	0	0	0	0.024	0	0	0.17	0	10.15	0	13.13
Time 10	24.36	0	0	0	0	0	0	0.025	0	0	0.21	0	9.24	0	13.78
Time 11	24.19	0	0	0	0	0	0	0.024	0	0	0.31	0	8.59	0	14.2
Time 12	24.15	0	0	0	0	0	0	0.024	0	0	0.66	0	8.35	0	14.05
Time 13	23.93	0	0	0	0	0	0	0.025	0	0	0.8	0	8.28	0	13.82
Time 14	24.05	0	0	0	0	0	0	0.024	0	0.01	0.49	0	8.66	0	13.83
Time 15	24.24	0	0	0	0	0	0	0.024	0	0.01	0.43	0	9.31	0	13.39
Time 16	23.86	0	0	0	0	0	0	0.024	0	0.01	0.44	0	8.95	0	13.4
Time 17	23.71	0	0	0	0	0	0	0.025	0	0.02	0.38	0	8.95	0	13.35
Time 18	23.48	0	0	0	0	0	0	0.024	0	0.01	0.43	0	8.57	0	13.46
Time 19	23.3	0	0	0	0	0	0	0.024	0	0.01	0.63	0	8.14	0	13.58
Time 20	23.09	0	0	0	0	0	0	0.024	0	0	0.61	0	7.08	0	14.47
Time 21	22.82	0	0	0	0	0	0	0.025	0	0.01	0.62	0	6.7	0	14.56
Time 22	23.1	0	0	0	0	0	0	0.024	0	0.02	0.83	0	6.96	0	14.38
Time 23	23.28	0	0	0	0	0	0	0.024	0	0.01	0.27	0	8.06	0	13.97
Time 24	23.47	0	0	0	0	0	0	0.025	0	0.03	0.33	0	8.74	0	13.42
18/03 2013	23.54	0	0	0	0	0	0	0.024	0	0.01	0.41	0	9.19	0	12.91
Time 02	23.35	0	0	0	0	0	0	0.025	0	0.01	0.21	0	9.53	0	12.58
Time 03	23.45	0	0	0	0	0	0	0.025	0	0	0.15	0	9.65	0	12.64
Time 04	23.47	0	0	0	0	0	0	0.024	0	0	0.42	0	9.22	0	12.82
Time 05	23.1	0	0	0	0	0	0	0.025	0	0	0.42	0	8.47	0	13.25
Time 06	22.98	0	0	0	0	0	0	0.024	0	0	0.5	0	7.73	0	13.84
Time 07	23.14	0	0	0	0	0	0	0.025	0	0	0.82	0	6.31	0	15.08
Time 08	22.66	0	0	0	0	0	0	0.024	0	0.01	0.53	0	4.25	0	17
Time 09	24.15	0	0	0	0	0	0	0.024	0	0.01	0.37	0	5.14	0	17.61
Time 10	25.22	0	0	0	0	0	0	0.024	0	0.01	0.42	0	6.29	0	17.37
Time 11	25.37	0	0	0	0	0	0	0.024	0	0.01	0.37	0	6.79	0	17.06
Time 12	25.46	0	0	0	0	0	0	0.024	0	0.01	0.66	0	6.72	0	16.92
Time 13	25.54	0	0	0	0	0	0	0.025	0	0	0.9	0	7.06	0	16.41
Time 14	25.59	0	0	0	0	0	0	0.024	0	0	0.55	0	7.27	0	16.57
Time 15	24.3	0	0	0	0	0	0	0.024	0	0	0.42	0	6.34	0	16.48
Time 16	23.3	0	0	0	0	0	0	0.025	0	0.01	0.5	0	5.45	0	16.42
Time 17	23.09	0	0	0	0	0	0	0.024	0	0.01	0.5	0	5.57	0	16.08
Time 18	23.12	0	0	0	0	0	0	0.025	0	0.01	0.63	0	5.76	0	15.79
Time 19	23.2	0	0	0	0	0	0	0.024	0	0	0.74	0	5.74	0	15.77
Time 20	22.96	0	0	0	0	0	0	0.024	0	0	1.76	0	3.77	0	15.78
Time 21	22.81	0	0	0	0	0	0	0.025	0	0	1.29	0	4.46	0	16.13
Time 22	23.01	0	0	0	0	0	0	0.024	0	0	1.41	0	4.92	0	15.8
Time 23	23.14	0	0	0	0	0	0	0.025	0	0	1.2	0	5.9	0	15.11
Time 24	23.5	0	0	0	0	0	0	0.024	0	0	0.71	0	7.63	0	14.2
19/03 2013	23.99	0	0	0	0	0	0	0.025	0	0.01	0.59	0	8.66	0	13.69
Time 02	23.9	0	0	0	0	0	0	0.024	0	0	0.62	0	8.74	0	13.53
Time 03	23.57	0	0	0	0	0	0	0.025	0	0	0.96	0	8.14	0	13.5
Time 04	23.52	0	0	0	0	0	0	0.025	0	0	1.72	0	7.06	0	13.78
Time 05	23.47	0	0	0	0	0	0	0.024	0	0	2.04	0	6.6	0	13.88
Time 06	23.18	0	0	0	0	0	0	0.025	0	0	1.57	0	5.81	0	14.91
Time 07	24.31	0	0	0	0	0	0	0.025	0	0	1.15	0	5.95	0	16.21
Time 08	24.44	0	0	0	0	0	0	0.025	0	0	0.97	0	4.66	0	17.79
Time 09	24.14	0	0	0	0	0	0	0.024	0	0	0.7	0	3.96	0	18.46
Time 10	24.19	0	0	0	0	0	0	0.024	0	0	0.99	0	3.79	0	18.39
Time 11	24.48	0	0	0	0	0	0	0.024	0	0	0.68	0	5.06	0	17.66
Time 12	24.82	0	0	0	0	0	0	0.024	0	0	0.67	0	5.95	0	17.1
Time 13	25.11	0	0	0	0	0	0	0.024	0	0	1.12	0	5.98	0	16.88
Time 14	25.19	0	0	0	0	0	0	0.024	0	0	0.78	0	6.86	0	16.41
Time 15	25.3	0	0	0	0	0	0	0.024	0	0	0.79	0	7.37	0	15.97
Time 16	25.22	0	0	0	0	0	0	0.024	0	0.01	1.02	0	7.08	0	16.03
Time 17	25.24	0	0	0	0	0	0	0.025	0	0	0.89	0	7.68	0	15.52
Time 18	25.16	0	0	0	0	0	0	0.024	0	0	0.86	0	8.06	0	15.09
Time 19	25.01	0	0	0	0	0	0	0.025	0	0	0.95	0	7.68	0	15.29
Time 20	24.53	0	0	0	0	0	0	0.024	0	0	1.71	0	5.47	0	16.33
Time 21	24.44	0	0	0	0	0	0	0.024	0	0	1.23	0	5.69	0	16.48
Time 22	24.82	0	0	0	0	0	0	0.025	0	0.01	1.56	0	6.14	0	16.06
Time 23	24.71	0	0	0	0	0	0	0.025	0	0	0.99	0	7.25	0	15.42
Time 24	25.04	0	0	0	0	0	0	0.025	0	0	0.59	0	8.57	0	14.75
20/03 2013	24.53	0	0	0	0	0	0	0.024	0	0.01	0.82	0	8.54	0	14.11
Time 02	24.6	0	0	0	0	0	0	0.025	0	0	0.97	0	8.76	0	13.83
Time 03	24.62	0	0	0	0	0	0	0.024	0	0	1.01	0	8.74	0	13.74
Time 04	24.61	0	0	0	0	0	0	0.025	0	0	1.7	0	8.16	0	13.7
Time 05	24.56	0	0	0	0	0	0	0.024	0	0.01	1.96	0	7.73	0	13.86
Time 06	24.31	0	0	0	0	0	0	0.024	0	0	1.31	0	7.49	0	14.47
Time 07	24.58	0	0	0	0	0	0	0.025	0	0	1.14	0	6.82	0	15.6
Time 08	24.47	0	0	0	0	0	0	0.024	0	0	0.85	0	4.82	0	17.76
Time 09	24.23	0	0	0	0	0	0	0.024	0	0	0.61	0	4.18	0	18.4
Time 10	24.4	0	0	0	0	0	0	0.024	0	0	0.66	0	4.63	0	18.06
Time 11	24.6	0	0	0	0	0	0	0.024	0	0	0.79	0	4.61	0	18.13
Time 12	24.73	0	0	0	0	0	0	0.025	0	0	1.11	0	5.02	0	17.51
Time 13	24.92	0	0	0	0	0	0	0.024	0	0	1.2	0	5.62	0	17
Time 14	24.81	0	0	0	0	0	0	0.025	0	0	0.85	0	5.78	0	17.08
Time 15	24.76	0	0	0	0	0	0	0.024	0	0	0.64	0	5.76	0	17.29
Time 16	24.88	0	0	0	0	0	0	0.025	0	0	0.78	0	5.93	0	17.08
Time 17	24.84	0	0	0	0	0	0	0.024	0	0	0.81	0	6.58	0	16.35
Time 18	24.73	0	0	0	0	0	0	0.025	0	0	0.91	0	6.55	0	16.2
Time 19	24.92	0	0	0	0	0	0	0.025	0	0	0.97	0	6.5	0	16.35
Time 20	24.46	0	0	0	0	0	0	0.024	0	0	1.74	0	4.75	0	16.95
Time 21	23.87	0	0	0	0	0	0	0.024	0	0	1.26	0	4.68	0	16.96
Time 22	24.33	0	0	0	0	0	0	0.025	0	0.01	1.49	0	5.4	0	16.4
Time 23	24.85	0	0	0	0	0	0	0.024	0	0	0.94	0	7.34	0	15.47
Time 24	25.13	0	0	0	0	0	0	0.025	0	0	0.64	0	8.59	0	14.78
21/03 2013	25.32	0	0	0	0	0	0	0.024	0	0	1.11	0	8.86	0	14.2
Time 02	25.39	0	0	0	0	0	0	0.025	0	0	1.46	0	8.93	0	13.84
Time 03	25.42	0	0	0	0	0	0	0.025	0	0	2.58	0	7.97	0	13.75
Time 04	25.4	0	0	0	0	0	0	0.025	0	0	1.9	0	8.5	0	13.84
Time 05	25.3	0	0	0	0	0	0	0.024	0	0	1.54	0	8.64	0	14.01
Time 06	25.31	0	0	0	0	0	0	0.025	0	0	1.46	0	8.28	0	14.4
Time 07	25.68	0	0	0	0	0	0	0.025	0	0	1.2	0	7.78	0	15.53
Time 08	25.38	0	0	0	0	0	0	0.025	0	0	0.88	0	5.83	0	17.54
Time 09	25.38	0	0	0	0	0	0	0.024	0	0	0.62	0	6.19	0	17.43
Time 10	25.7	0	0	0	0	0	0	0.024	0	0	0.73	0	6.46	0	17.28
Time 11	25.74	0	0	0	0	0	0	0.024	0	0.01	0.81	0	6.79	0	16.96
Time 12	26.03	0	0	0	0	0	0	0.024	0	0	1.15	0	7.42	0	16.21
Time 13	26.34	0	0	0	0	0	0	0.024	0	0	1.18	0	7.9	0	15.98
Time 14	26.38	0	0	0	0	0	0	0.024	0	0	0.78	0	8.57	0	15.7
Time 15	26.47	0	0	0	0	0	0	0.024	0	0	0.66	0	8.57	0	15.92
Time 16	26.48	0	0	0	0	0	0	0.025	0	0	0.68	0	9.17	0	15.34
Time 17	26.7	0	0	0	0	0	0	0.024	0	0	0.75	0	9.86	0	14.71
Time 18	26.52	0	0	0	0	0	0	0.024	0	0	0.85	0	9.72	0	14.65
Time 19	26.27	0	0	0	0	0	0	0.025	0	0	0.9	0	9.22	0	14.83
Time 20	25.9	0	0	0	0	0	0	0.024	0	0	1.68	0	7.22	0	15.83
Time 21	25.76	0	0	0	0	0	0	0.025	0	0	1.23	0	7.51	0	15.82
Time 22	25.8	0	0	0	0	0	0	0.025	0	0.01	1.55	0	7.66	0	15.44
Time 23	25.85	0	0	0	0	0	0	0.025	0	0	1.02	0	8.71	0	14.92
Time 24	26.12	0	0	0	0	0	0	0.024	0	0	0.69	0	9.96	0	14.2
22/03 2013	26.25	0	0	0	0	0	0	0.025	0	0	1.47	0	9.84	0	13.66
Time 02	26.21	0	0	0	0	0	0	0.025	0	0	1.99	0	9.55	0	13.42
Time 03	26.2	0	0	0	0	0	0	0.025	0	0	1.62	0	9.82	0	13.47
Time 04	26.21	0	0	0	0	0	0	0.025	0	0	2.15	0	9.36	0	13.45
Time 05	26.12	0	0	0	0	0	0	0.024	0	0	1.92	0	9.12	0	13.87
Time 06	25.84	0	0	0	0	0	0	0.025	0	0	1.19	0	9.17	0	14.28
Time 07	25.54	0	0	0	0	0	0	0.025	0	0	1.05	0	7.99	0	15.34
Time 08	25.06	0	0	0	0	0	0	0.025	0	0	0.79	0	5.28	0	17.88
Time 09	25.02	0	0	0	0	0	0	0.024	0	0	0.57	0	5.16	0	18.19
Time 10	25.01	0	0	0	0	0	0	0.024	0	0.01	0.73	0	5.26	0	17.92
Time 11	25.17	0	0	0	0	0	0	0.024	0	0	0.72	0	5.83	0	17.48
Time 12	25.08	0	0	0	0	0	0	0.024	0	0	0.94	0	6.02	0	17
Time 13	24.72	0	0	0	0	0	0	0.024	0	0	1.2	0	5.28	0	17.14
Time 14	24.86	0	0	0	0	0	0	0.024	0	0	0.77	0	6.65	0	16.36
Time 15	24.91	0	0	0	0	0	0	0.025	0	0	0.73	0	7.06	0	15.96
Time 16	24.99	0	0	0	0	0	0	0.024	0	0	0.8	0	7.39	0	15.7
Time 17	25.16	0	0	0	0	0	0	0.024	0	0	0.87	0	8.3	0	14.83
Time 18	25.14	0	0	0	0	0	0	0.025	0	0	0.96	0	8.28	0	14.78
Time 19	24.68	0	0	0	0	0	0	0.024	0	0	0.86	0	7.39	0	15.34
Time 20	24.27	0	0	0	0	0	0	0.025	0	0	0.97	0	5.83	0	16.46
Time 21	24.04	0	0	0	0	0	0	0.025	0	0	0.9	0	5.83	0	16.29
Time 22	24.24	0	0	0	0	0	0	0.024	0	0	0.84	0	6.46	0	15.92
Time 23	24.49	0	0	0	0	0	0	0.025	0	0	0.61	0	7.37	0	15.45
Time 24	24.38	0	0	0	0	0	0	0.025	0	0	0.61	0	7.78	0	14.95
23/03 2013	24.32	0	0	0	0	0	0	0.025	0	0	0.62	0	8.23	0	14.4
Time 02	24.04	0	0	0	0	0	0	0.025	0	0	0.61	0	8.21	0	14.2
Time 03	23.97	0	0	0	0	0	0	0.025	0	0	0.44	0	8.35	0	14.13
Time 04	24	0	0	0	0	0	0	0.025	0	0	0.76	0	8.14	0	14.13
Time 05	23.84	0	0	0	0	0	0	0.025	0	0	0.81	0	7.85	0	14.17
Time 06	23.71	0	0	0	0	0	0	0.025	0	0	0.78	0	7.63	0	14.31
Time 07	23.68	0	0	0	0	0	0	0.024	0	0	0.88	0	7.3	0	14.53
Time 08	23.5	0	0	0	0	0	0	0.025	0	0	0.75	0	6.65	0	15.13
Time 09	23.23	0	0	0	0	0	0	0.025	0	0	0.67	0	5.88	0	15.71
Time 10	23.2	0	0	0	0	0	0	0.025	0	0.01	0.72	0	5.54	0	16
Time 11	23.7	0	0	0	0	0	0	0.024	0	0	0.5	0	6.05	0	16.16
Time 12	24.16	0	0	0	0	0	0	0.024	0	0	0.52	0	6.89	0	15.71
Time 13	24.38	0	0	0	0	0	0	0.025	0	0	0.93	0	7.2	0	15.16
Time 14	24.66	0	0	0	0	0	0	0.025	0	0.01	0.9	0	7.99	0	14.65
Time 15	24.89	0	0	0	0	0	0	0.024	0	0	0.63	0	8.81	0	14.29
Time 16	24.93	0	0	0	0	0	0	0.025	0	0	0.51	0	9.36	0	13.88
Time 17	24.89	0	0	0	0	0	0	0.025	0	0	0.57	0	9.29	0	13.88
Time 18	24.41	0	0	0	0	0	0	0.024	0	0	1	0	8.3	0	14
Time 19	24.18	0	0	0	0	0	0	0.025	0	0	0.87	0	7.7	0	14.55
Time 20	24.08	0	0	0	0	0	0	0.025	0	0	0.49	0	7.13	0	15.43
Time 21	23.74	0	0	0	0	0	0	0.024	0	0	0.42	0	7.15	0	15.14
Time 22	24.07	0	0	0	0	0	0	0.025	0	0.01	0.52	0	7.61	0	14.91
Time 23	24.16	0	0	0	0	0	0	0.025	0	0	0.37	0	8.26	0	14.5
Time 24	24.39	0	0	0	0	0	0	0.024	0	0	0.25	0	8.69	0	14.35
24/03 2013	24.33	0	0	0	0	0	0	0.025	0	0	0.27	0	8.74	0	14.24
Time 02	24.35	0	0	0	0	0	0	0.025	0	0	0.3	0	8.9	0	14.07
Time 03	24.37	0	0	0	0	0	0	0.025	0	0	0.3	0	8.98	0	14.04
Time 04	24.43	0	0	0	0	0	0	0.024	0	0	0.3	0	8.9	0	14.11
Time 05	24.33	0	0	0	0	0	0	0.025	0	0	0.3	0	8.86	0	14.09
Time 06	24.06	0	0	0	0	0	0	0.025	0	0	0.38	0	8.35	0	14.32
Time 07	24.09	0	0	0	0	0	0	0.024	0	0	0.45	0	8.14	0	14.47
Time 08	24.1	0	0	0	0	0	0	0.025	0	0	0.54	0	7.75	0	14.75
Time 09	23.87	0	0	0	0	0	0	0.025	0	0	0.45	0	7.49	0	14.92
Time 10	23.86	0	0	0	0	0	0	0.024	0	0	0.45	0	7.34	0	14.99
Time 11	24.02	0	0	0	0	0	0	0.026	0	0	0.5	0	7.85	0	14.56
Time 12	24.41	0	0	0	0	0	0	0.024	0	0	0.94	0	7.49	0	14.87
Time 13	24.65	0	0	0	0	0	0	0.025	0	0	1.12	0	7.97	0	14.44
Time 14	24.97	0	0	0	0	0	0	0.025	0	0	0.77	0	8.98	0	14.04
Time 15	24.95	0	0	0	0	0	0	0.025	0	0	0.74	0	9.34	0	13.7
Time 16	25.28	0	0	0	0	0	0	0.024	0	0	0.67	0	10.56	0	12.77
Time 17	25.11	0	0	0	0	0	0	0.025	0	0	0.75	0	10.49	0	12.62
Time 18	24.97	0	0	0	0	0	0	0.024	0	0	0.87	0	10.06	0	12.86
Time 19	24.68	0	0	0	0	0	0	0.025	0	0	0.8	0	9.41	0	13.31
Time 20	24.29	0	0	0	0	0	0	0.024	0	0	0.87	0	7.92	0	14.42
Time 21	24.14	0	0	0	0	0	0	0.025	0	0	0.86	0	7.56	0	14.67
Time 22	24.31	0	0	0	0	0	0	0.025	0	0	0.91	0	7.73	0	14.62
Time 23	24.34	0	0	0	0	0	0	0.024	0	0	0.54	0	8.4	0	14.31
Time 24	24.5	0	0	0	0	0	0	0.025	0	0	0.62	0	9.02	0	13.78
25/03 2013	24.63	0	0	0	0	0	0	0.025	0	0	0.73	0	9.5	0	13.24
Time 02	24.59	0	0	0	0	0	0	0.024	0	0	0.47	0	9.94	0	13.08
Time 03	24.77	0	0	0	0	0	0	0.025	0	0	0.5	0	9.91	0	13.21
Time 04	24.63	0	0	0	0	0	0	0.025	0	0	0.72	0	9.41	0	13.37
[truncated: 24,284 more rows]

## Sheet: Cost of energy not supplied
Table S2. Cost of energy not supplied (CENS) due to fault on the line between node 5 and 6.
Date	CENS	Cause
2015-08-27	0	Thunder
2015-10-07	1539308	Wind
2015-01-15	208481	Thunder
2015-01-15	486457	Thunder
2015-01-14	219595	Thunder
2014-12-10	108819	Thunder
2014-07-27	90114	Thunder
2014-07-26	83974	Thunder
2014-01-20	167813	Vegitation
2013-05-19	46599	Thunder
2013-05-19	52012	Thunder
2012-07-30	24386	Thunder
2012-05-16	145818	Technical error
2012-06-27	91821	Technical error
2012-02-14	488981	Human activity
2011-11-30	108437	Thunder
2011-12-13	125912	Thunder
2011-09-01	440344	Aging
2011-11-27	180616	Vegitation
2010-07-16	252306	Vegitation
2008-02-22	62912	Wind
